# Supplementary material for: Zebrafish fin regeneration involves generic and regeneration-specific osteoblast injury responses
Source: eLife. 2022 Jun 24;11:e77614. doi: 10.7554/eLife.77614 (PMC9259016; doi:10.7554/eLife.77614)
Supplement: Figure 1—source data 1. [file elife-77614-fig1-data1.xlsx]

## Sheet: Fig 1B
ray position	mean bglap intensity
XM mean	ray02	ray04	ray05	ray06	ray07	ray008	ray09	ray10	ray11	ray12	ray13	ray14
-30.2117		0.056599	0.182437	0.0498641	0.311148	0.311976	0.126456	0	0	0.121192	0.477558	0.081676
-75.3145	0.06205	0.043622	0.09729	0.154087	0.200335	0	0.156406	0.288703	0.26455	0.072938	0
-126.674	0.008948	0	0.031097	0	0	0.413997	0		0.233862	0		0.078255
-176.946	0.000584	0.114301	0	0.0134853	0.050796	0.628388		0.365411			0.558963	0.003207
-226.333	0.051157	0.169796	1	0.075162		0.867422	0.410982	0.527662	0.979894	0.344007	0.276833	0.060509
-275.727	0	0.25704	0.600178	0.125967	1	0.892558	0.62396	0.530916	0.852381	0.340227	0.383607	0
-323.141	0.018868	0.327996	0.46409	0.129626	0.747527	1	0.790904	0.603905	0.602116	0.36402	0.591859	0.159718
-371.334	0.750827	0.251242	0.645343	0.635166	0.672087	0.748152	1	0.545328	0.837566	0.35179	0.182604
-424.65	0.718732	0.569023	0.978084	0.958499	0.382565	0.977822	0.538547	1	0.660317	0.281299		0.985247
-467.774	0.686442	1	0.96831	0.804307	0.35658	0.672252				1	0.546418	0.85247
-519.963	0.846528	0.801215	0.812972	1	0.67544	0.718088	0.799224	0.900511	0.878307	0.7505	1	1
-564.638	1	0.705964	0.521694	0.989755	0.762783	0.686052	0.810871	0.797768	1	0.60885	0.705325

## Sheet: Fig 1H
source		distance 1st joint - gfp segment -1 (µm) 0dpa	distance 1st joint - gfp segment -1 (µm) 1dpa	D distance 1st joint	% distance 1st joint change	migration 1 dpa (%)	distance 2nd joint - gfp segment -1 (µm) 0dpa	distance 2nd joint - gfp segment -1 (µm) 1dpa	D distance 1st joint	% distance 1st joint change	migration 1 dpa (%)	notes
MC_008	control_fish01	68.375	18.461	49.914	-73.0004	73.0004	68.509	90.149	-21.64	31.5871	-31.5871	1 ray / fish
	control_fish02	89.122	27.62	61.502	-69.0088	69.0088	61.187	91.187	-30	49.03	-49.03
	control_fish03	72.86	8.1	64.76	-88.8828	88.8828	75.726	88.1	-12.374	16.3405	-16.3405
	control_fish04	72.649	38.547	34.102	-46.9408	46.9408	88.661	129.844	-41.183	46.45	-46.45
	control_fish05	94.016	35.896	58.12	-61.8193	61.8193	87.162	114.886	-27.724	31.8074	-31.8074
	control_fish06	77.396	28.667	48.729	-62.9606	62.9606	79.835	110.738	-30.903	38.7086	-38.7086
	control_fish07	94.886	29.981	64.905	-68.4031	68.4031	68.908	92.089	-23.181	33.6405	-33.6405
	control_fish08	74.633	37.983	36.65	-49.107	49.107	73.771	94.244	-20.473	27.7521	-27.7521
	control_fish09	73.15	37.396	35.754	-48.8776	48.8776	74.616	108.908	-34.292	45.958	-45.958
MC_005	control_fish01	70.669	32.877	37.792	-53.4775	53.4775	77.959	97.377	-19.418	24.908	-24.908	1 ray / fish
	control_fish02	89.595	27.397	62.198	-69.4213	69.4213	57.636	93.801	-36.165	62.7472	-62.7472
	control_fish03	73.621	29.315	44.306	-60.1812	60.1812	98.306	135.801	-37.495	38.1411	-38.1411
	control_fish04	57.959	24.929	33.03	-56.9886	56.9886	83.374	97.442	-14.068	16.8734	-16.8734
	control_fish05	77.128	39.315	37.813	-49.0263	49.0263	72.841	125.727	-52.886	72.6047	-72.6047
	control_fish06	79.01	24.658	54.352	-68.7913	68.7913	74.224	91.24	-17.016	22.9252	-22.9252
	control_fish07	73.371	33.33	40.041	-54.5733	54.5733	66.478	91.984	-25.506	38.3676	-38.3676
MC_012	control_fish01	105.221	51.381	53.84	-51.1685	51.1685	74.615	129.141	-54.526	73.0765	-73.0765	1 ray / fish
	control_fish02	104.987	38.516	66.471	-63.3136	63.3136	62.615	86.571	-23.956	38.2592	-38.2592
	control_fish03	77.055	30	47.055	-61.0668	61.0668	102.99	163.095	-60.105	58.36	-58.36
	control_fish04	105.427	39.876	65.551	-62.1767	62.1767	70.018	108.788	-38.77	55.3715	-55.3715
	control_fish05	70	13.727	56.273	-80.39	80.39	109.598	157.848	-48.25	44.0245	-44.0245
	control_fish06	82.675	5.89	76.785	-92.8757	92.8757	78.666	142.865	-64.199	81.6096	-81.6096
	control_fish07	88.648	39.644	49.004	-55.2793	55.2793	66.34	80.289	-13.949	21.0265	-21.0265
	control_fish08	54.768	9.028	45.74	-83.5159	83.5159	86.666	128.206	-41.54	47.9311	-47.9311
	control_fish09	51.281	19.549	31.732	-61.8787	61.8787	48.991	90.773	-41.782	85.2851	-85.2851
	control_fish10	96.419	33.333	63.086	-65.429	65.429	59.252	80.811	-21.559	36.3853	-36.3853
	average	79.8047	29.0545	50.7502	-63.7905	63.7905	75.7286	108.535	-32.8062	43.8143	-43.8143

## Sheet: Fig 1I
source	0dpa	1dpa	distance seg -1 - 1st joint (µm) 0 dpa	distance seg -1 - 1st joint (µm) 1 dpa	D distance seg -1 - 1st joint	% distance change seg -1 -1st joint	distance seg -2 - 2nd joint (µm) 0 dpa	distance seg -2 - 2nd joint (µm) 1 dpa	D distance seg -2 - 2nd joint	% distance change seg -2 -2nd joint	distance seg -3 - 3nd joint (µm) 0 dpa	distance seg -3 - 3nd joint (µm) 1 dpa	D distance seg -3 - 3nd joint	% distance change seg -3 - 3nd joint	analysed 2nd ray
MC_009	fish_	_6	68.375	28.461	39.914	-58.3751	62.42	61.4	1.02	-1.63409	47.42	49.48	-2.06	4.34416
	fish_1	_8	89.122	27.62	61.502	-69.0088	59.93	58.28	1.65	-2.75321	57.9	60.24	-2.34	4.04145
	fish_2	_5	72.86	18.1	54.76	-75.1578	64.51	66.74	-2.23	3.45683	63.18	62.99	0.19	-0.300728
	fish_3	_3	72.649	38.547	34.102	-46.9408	67.21	69.89	-2.68	3.9875	74.37	72.64	1.73	-2.32621
	fish_4	_4	94.016	25.896	68.12	-72.4558	69.01	74.01	-5	7.24533	75.24	69.61	5.63	-7.48272
	fish_5	_7	77.396	28.667	48.729	-62.9606	79.37	77.64	1.73	-2.17966	74.93	73.36	1.57	-2.09529
	fish_6	_	94.886	39.981	54.905	-57.8642	70.38	74.01	-3.63	5.15772	76.28	71.5	4.78	-6.26639			distance 0 dpa
	fish_7	_2	74.633	37.983	36.65	-49.107	70.65	68.21	2.44	-3.45364	52.55	53.32	-0.77	1.46527			mean	sem	p-value to seg-1	p-value to seg-2
	fish_8	_1	73.15	37.396	35.754	-48.8776	77.29	74.38	2.91	-3.76504	74.28	70.24	4.04	-5.43888		seg -1	75.4506	2.96669
	fish_9	dead	43.581				98.18				75.4					seg -2	68.5663	0.660235	0.0711447
MC_012	_	_4	105.221	51.381	53.84	-51.1685	86.27	86.38	-0.11	0.127507	100.6	103.92	-3.32	3.3002		seg -3	71.0943	0.524054	0.276981	0.48001
	_1	_1	104.987	38.516	66.471	-63.3136	59.57	57.38	2.19	-3.67635	66.06	67.25	-1.19	1.80139
	_2	_8	77.055	30	47.055	-61.0668	66.14	68.38	-2.24	3.38676	67.98	66.48	1.5	-2.20653			migration
	_3	_9	95.427	29.876	65.551	-68.6923	96.72	99.38	-2.66	2.75021	96.44	100.92	-4.48	4.64538			mean	sem	p-value to seg-1	p-value to seg-2
	_4	_2	70	33.727	36.273	-51.8186	61.62	60.38	1.24	-2.01233	73.28	74.66	-1.38	1.88319		seg -1	-66.5715	2.5288
	_5	_3	102.675	45.89	56.785	-55.3056	60.67	61.38	-0.71	1.17027	105.49	99.43	6.06	-5.74462		seg -2	0.25337	0.671921	6.43578e-31
	_6	_5	88.648	39.644	49.004	-55.2793	60.98	62.38	-1.4	2.29583	70.76	68.44	2.32	-3.27869		seg -3	0.00120082	0.681836	1.19612e-30	0.793219
	_7	_6	64.768	29.028	35.74	-55.1816	53.35	53.38	-0.03	0.0562324	81.73	82.42	-0.69	0.844243
	_8	_7	51.281	19.549	31.732	-61.8787	67.32	64.38	2.94	-4.3672	60.42	58.14	2.28	-3.77358
	_9	_	96.419	43.333	53.086	-55.0576	59.82	60.38	-0.56	0.936142	54.51	55.01	-0.5	0.917263
	_	_4	60.24	13.8	46.44	-77.0916	52.43	54.31	-1.88	3.58573	67.03	67.76	-0.73	1.08906
	_1	_1	50.14	20.86	29.28	-58.3965	68.8	64.88	3.92	-5.69767	72.65	75.71	-3.06	4.21198
	_2	_8	77.88	17.15	60.73	-77.9789	67.94	71.48	-3.54	5.21048	78.5	83.5	-5
	_3	_9	71.62	12.17	59.45	-83.0075	75.32	73.14	2.18	-2.89432	75.93	76.14	-0.21	0.276571
	_4	_2	63.86	17.89	45.97	-71.9856	49.68	47.95	1.73	-3.48229	46.75	47.57	-0.82	1.75401
	_5	_3	66.46	11.17	55.29	-83.1929	52.46	49.23	3.23	-6.15707	89.9	92.17	-2.27	2.52503
	_6	_5	63.78	7.82	55.96	-87.7391	67.94	69.9	-1.96	2.8849	65.98	69.2	-3.22	4.88027
	_7	_6	60.26	4.34	55.92	-92.7979	73.19	75	-1.81	2.47302	63.4	62.93	0.47	-0.741325
	_8	_7	69.78	7.67	62.11	-89.0083	89.94	92.64	-2.7	3.002	59.36	61.81	-2.45	4.12736
	_9	_	62.35	6.32	56.03	-89.8637	67.88	69.03	-1.15	1.69417	64.51	62.95	1.56	-2.41823
