# Supplementary material for: Zebrafish fin regeneration involves generic and regeneration-specific osteoblast injury responses
Source: eLife. 2022 Jun 24;11:e77614. doi: 10.7554/eLife.77614 (PMC9259016; doi:10.7554/eLife.77614)
Supplement: Figure 2—source data 1. [file elife-77614-fig2-data1.xlsx]

## Sheet: Fig 2B
MC_013
	width / length
	seg -1	seg -2	seg -3
ray01	0.161914	0.555749	0.397296
series020/22	0.1139	0.455923	0.360138
	0.117734	0.204699	0.486055
	0.116825	0.389755	0.429036
	0.143821	0.604412	0.359495
	0.173319	0.277836	0.327082
	0.133439	0.388045	0.328437
	0.095772	0.344801	0.271088
	0.124771	0.439872	0.447469
	0.170616	0.292911	0.347869
	0.142262	0.36347	0.452424
	0.156334	0.411749	0.482647
	0.193725	0.410578	0.360734
	0.120958	0.187903	0.465494
	0.121304	0.416951	0.18573
	0.164749	0.311316	0.309947
	0.106774	0.357922	0.458998
	0.133707	0.388536	0.343424
	0.192607	0.385911	0.32776
	0.217571	0.572653	0.442482
	0.16195	0.406381
ray02	0.171452	0.260504	0.418092
series024/26/8	0.192034	0.246893	0.376733
	0.101689	0.271088	0.269049
	0.175625	0.350018	0.365734
	0.224123	0.59479	0.36323
	0.186991	0.370529	0.235521
	0.207316	0.322982	0.404656
	0.230554	0.528466	0.387728
	0.20581	0.419039	0.500206
	0.139124	0.364325	0.304044
	0.309068	0.306567	0.471113
	0.282417	0.423091	0.406764
	0.242224	0.364325	0.191636
	0.119139		0.389773
	0.124953		0.267245
	0.195754		0.39677
	0.173176		0.521896
	0.186261		0.244716
	0.184387		0.282825
	0.192787		0.27404
			0.383027
			0.288564
ray03	0.176103	0.306567	0.399214
series030/32	0.145688	0.423091	0.588537
	0.168305	0.205219	0.458414
	0.187398	0.284819	0.392572
	0.145938	0.276122	0.498178
	0.163969	0.466383	0.419329
	0.194915	0.240779	0.31395
	0.24944	0.308191	0.40117
	0.19326	0.309757	0.34241
	0.192857	0.282705	0.180693
	0.0985971	0.395882	0.196697
	0.175133	0.293927	0.309281
	0.127915	0.285524	0.153565
		0.282732	0.220506
ray04	0.0865706	0.320717	0.2696
series034/36	0.137093	0.363742	0.418684
	0.177302	0.254475	0.488397
	0.126834	0.307619	0.376579
	0.120352	0.277179	0.328003
	0.216975	0.309625	0.38828
	0.101479	0.405808
	0.163283	0.326574
		0.254218
		0.232756
		0.282675
		0.347469
ray05	0.173571	0.287156	0.340588
series040/042	0.153523	0.264332	0.404184
	0.157006	0.215985	0.345256
	0.321627	0.295972	0.285489
	0.15773	0.217414	0.413525
	0.261364	0.229817	0.360084
	0.103645	0.252241	0.301255
	0.203097	0.237925	0.362575
	0.103351	0.2955	0.394668
	0.188167	0.204466	0.356838
		0.209364
		0.283013
	0.167798	0.333719

## Sheet: Fig 2C
MC_013
	angular deviation
	seg -1	seg -2	seg -3
ray01	2.057	38.32	14.672
series020/22	1.641	13.054	22.03
	3.044	21.857	20.859
	6.098	12.241	32.788
	5.365	28.65	20.869
	4.719	22.082	55.577
	8.468	28.688	17.878
	8.618	30.998
	5.856	48.838
	5.299	17.668
	5.728	17.668
	4.763	30.153
		22.6
ray02
series024/26/8	9.954	15.002	38.541
	7.488	24.579	15.706
	4.575	9.502	10.424
	5.647	15.069	43.21
	6.996	20.118	11.989
	5.425	15.007	13.709
	5.79	55.941	10.092
	7.693	7.799	17.737
	22.731		16.47
	6.946
	4.638
	6.343
	6.643
	4.076
	6.12
	7.722
	9.068
ray03	4.252	15.964	19.203
series030/32	5.085	64.514	14.685
	6.775	11.299	56.843
	6.325	10.44	13.675
	6.471	48.607	15.635
	9.023	11.554	23.419
	15.165	17.006	18.467
	11.17	8.898
	6.579	13.1
ray04	5.221	7.083	19.909
series034/36	7.587	57.374	32.387
	4.238	6.418	20.086
	13.304	11.49	16.267
	4.671	11.154	22.814
	10.442	10.239	58.959
	5.269	10.356	17.164
			20.895
			13.38
ray05	5.233	19.432	18.724
series040/042	8.109	7.801	13.764
	8.251	65.19	18.621
	7.659	8.333	20.752
	8.211	6.908	69.751
	8.122	10.503	28.979
	7.332	11.287	13.96
	9.182		10.511
			11.919
			48.441
			17.081
			18.761

## Sheet: Fig 2E
width / length
segM2 0.6-1	segM1 0.-0.4	segM1 0.6-1
0.297986	0.0947474	0.187579
0.580328	0.143141	0.240373
0.457743	0.121139	0.197285
0.542465	0.122928	0.14486
0.475442	0.0868975	0.204249
	0.277641	0.141214
	0.202071	0.168075
0.337657	0.187454	0.192039
0.507028	0.129022	0.139066
0.465598	0.191096	0.108169
0.451297	0.167774	0.146782
0.465582	0.144484	0.123136
0.362699	0.167974	0.190177
0.39902	0.189937	0.131524
0.284318	0.295073	0.175312
0.415192	0.172301	0.157809
	0.265468	0.273896
	0.204747	0.101915
	0.138826	0.224662
	0.225225	0.13174
0.434215	0.194667	0.201824
0.46532	0.162825	0.198146
0.422117	0.145876	0.229073
0.492305	0.256272	0.224529
0.433245	0.3177	0.235086
0.575551	0.192951	0.212198
0.512064	0.282076	0.220127
0.406218	0.246762	0.150014
	0.289951	0.215763
0.374507	0.222048	0.18092
0.377921	0.211262	0.196939
0.361902	0.147664	0.245814
0.290213	0.241512	0.219358
0.415231	0.169166	0.18672
	0.188356	0.271239
	0.166406	0.260207
	0.134222	0.195931
0.333141	0.209786	0.25516
0.453331	0.180082	0.273609
0.464736	0.187762	0.162947
0.388809	0.15692	0.291854
0.30447	0.129899	0.270388
0.386589	0.251971	0.283368
0.375232	0.250575	0.288202
	0.2539	0.237293
	0.203098	0.259908
	0.181496	0.134777
	0.119119	0.400212
	0.225229	0.173094
	0.18156	0.174443
	0.186145	0.309955
	0.153052	0.186535
	0.186821	0.154285
	0.252713	0.126063
	0.321298	0.241715
		0.225191
		0.190169
		0.180147
		0.17339
		0.168748
		0.207266
		0.249071
		0.27875
		0.152466
		0.146236
		0.125037
		0.172862
		0.213016
		0.174478
		0.145564
		0.168514
		0.199891
		0.261671
		0.2
		0.233706
		0.196668
		0.176662
		0.117452

## Sheet: Fig 2F
width / length
proximal	distal
0.592724	0.289644
0.310298	0.517489
0.275766	0.345833
0.336595	0.312129
0.392352	0.303941
0.318473	0.227272
0.28406	0.230096
0.312288	0.218354
0.228864	0.329654
0.344943	0.285331
0.249995	0.191977
0.409933	0.299611
0.236982	0.149234
0.209233	0.423151
0.341174	0.326685
0.302785	0.24502
0.358407	0.238343
0.249401	0.196462
0.22168	0.250008
0.397979	0.21737
0.258916	0.353095
0.314961	0.327172
0.296757	0.195976
0.151101	0.346141
0.363481	0.291542
0.289493	0.153476
0.253618	0.207859
0.260344	0.290664
0.230222	0.304286
0.305232	0.559484
0.533591	0.197981
0.419561	0.533779
0.235654	0.49169
0.30904	0.480913
0.273253	0.338445
0.258851	0.344107
0.226771	0.360244
0.463511	0.271112
0.348821	0.222822
0.25547	0.367927
0.499686	0.320372
0.323075	0.332091
0.180958	0.370114
0.532186	0.325978
0.341463	0.202873
0.386292	0.407657
0.393912	0.324618
0.290654	0.485811
0.191221	0.499486
0.418641
0.180758
0.206386
0.213936
0.40011
0.302046
0.442915
0.25607
0.328345
0.328752
0.221488
0.386089
0.494376
0.386593
0.265549
0.461897
0.303845
0.392832
0.328538
0.249422
0.253413
0.316127
0.236343
0.279121
0.277337
0.259979
0.137351
0.488189
0.251386
0.198626
0.368593
0.512491
0.298232

## Sheet: Fig 2 supp 1B
width / length
uncut width_length	seg-3 width_length
0.259916	0.540584
0.311616	0.372183
0.377327	0.288695
0.389198	0.451273
0.505435	0.226903
0.243426	0.347028
0.543044	0.489263
0.579947	0.250945
0.359944	0.338452
0.342452	0.439029
0.289325	0.374253
0.433338	0.535545
0.353545	0.237285
0.421671	0.159171
0.39648	0.404603
0.399353	0.491376
0.334395	0.515658
0.177479	0.275563
0.31965	0.428644
0.310129	0.360402
0.5527	0.370374
0.433392	0.502175
0.248202	0.424342
0.37242	0.393114
0.398937	0.292694
0.25256	0.247286
0.401499	0.332322
0.18578	0.40967
0.475049	0.306437
0.449863	0.450939
0.171252	0.215269
0.359697	0.193911
0.405351	0.179084
0.415618	0.374638
0.389206	0.263538
0.317641	0.295144
0.307303	0.23913
0.30793	0.205219
0.408742	0.284819
0.371992	0.276122
0.241963	0.466383
0.264889	0.240779
0.50761	0.308191
0.151702	0.309757
0.359291	0.282705
0.221163	0.395882
0.366715	0.493927
0.304301	0.582732
0.386775	0.320717
0.365659	0.363742
0.470661	0.254475
0.308652	0.307619
0.376483	0.277179
0.234053	0.309625

## Sheet: Fig 2 S1C
angle from AP-axis
non-inj	segM1 8hpa	segM1 12hpa	segM1 15hpa	segM1 24hpa
6.263	28.18	13.285	2.337	2.057
2.862	48.99	5.315	17.447	1.641
12.031	37.41	0	0.988	3.044
26.131	65.43	4.899	6.147	6.098
0.818	6.71	3.013	0.83	5.365
0	45	3.366	3.721	4.719
2.49	36.47	5.194	6.089	8.468
2.454	27.41	12.011	14.697	8.618
0	33.27	3.691	13.134	5.856
35.789	34.44	0	3.252	5.299
1.042	10.78	18.122	1.975	5.728
79.114	40.16	12.653	3.576	4.763
23.782		10.081	8.842	9.954
28.301	12.09	3.013	10.008	7.488
24.444	1.33	4.764	9.462	4.575
12.426	4.67	3.652	4.456	5.647
10.784	33.69	20	14.826	6.996
15.517	21.25	4.653	16.26	5.425
26.587	18	2.862	2.045	5.79
22.305	18.08			7.693
33.877	15.35	12.265	3.122	22.731
17.543	0.95	0	6.582	6.946
26.599	6.88	1.245	2.083	4.638
17.972	9.69	3.24	9.628	6.343
14.023	9.69	9.211	8.94	6.643
	1.97	2.454	5.301	4.076
13.345		1.302	4.708	6.12
13.322	12.43	1.005	10.886	7.722
10.724	11.07	4.635	0.546	9.068
11.174	12.72	17.65	1.685	4.252
16.359	14.04	5.194	2.827	5.085
12.816	11	6.419	2.987	6.775
10.973		1.818		6.325
20.457	24.62		1.014	6.471
13.487	7.59	6.254	0.585	9.023
	8.33	13.536	15.47	15.165
9.582	5.19	0	0.774	11.17
11.265	13.24	14.265	1.868	6.579
10.077	18.43	6.203	0.63	5.221
12.284	10.54	3.9		7.587
16.389	9.73	5.793	16.009	4.238
13.475	6.71	14.5	9.707	13.304
	0		9.782	4.671
38.454	0	7.765	7.374	10.442
84.611	10.3	2.726	5.274	5.269
8.366	4.4	2.045	6.089	5.233
13.496	0.87	8.344	2.651	8.109
32.574	14.28	0.881	9.673	8.251
45	1.88	8.13	2.974	7.659
12.155	3.37	4.686	14.311	8.211
20.695	4.43	5.906		8.122
1.023	9.69	5.389	8.403	7.332
22.249	8.33	2.01	19.699	9.182
34.592	11.59	1.469	8.366
	15.95	0	14.783
4.927		2.49	8.561
72.614	7.28	15.35	12.458
0	11.73	0.988	15.48
6.654	1.79	6.766	8.616
4.236	0	1.909	17.447
58.039	2.12		5.618
15.945	20.17	7.001
14.797	8.75	0	1.975
10.62	0	13.671	6.52
9.324	48.24	3.434	13.57
21.644	41.31	3.576	32.829
0.616	18.43	29.055	8.596
7.237	11.98	13.173	6.654
6.483	11.31	12.938	6.71
10.366	26.57	15.709	1.169
8.973		22.036	5.274
1.614	6.88	38.047	13.627
17.176	10.18	39.094	1.302
19.654	9.29	34.875	9.972
8.393	7.28	35.362	3.752
17.819	8.47	66.251	6.633
11.113	3.99	2.49
25.71	17.59	0	12.529
	43.73	1.332	18.034
	41.5		18.06
	25.41	17.7	4.343
	13.71	7.125	4.038
	30.26	3.576	3.252
	25.91	10.081	10.62
	59.04	2.806	13.241
	27.18	7.368	0.83
	13.13	10.008
		2.49	5.44
	15.95	7.853	7.4
	18.92	0	10.491
	10.01	3.066	2.437
	0	9.689	10.685
	19.44	12.529	5.974
	22.38		4.853
	67.25	14.281	0.996
	31	2.411	3.013
	31.61	9.462	25.989
	60	10.739	11.434
	25.11	20.45	3.752
	7.31	2.816	33.69
	11.94	3.814	11.834
	8.37	1.364	4.814
	6.34	0.868
	18.43	5.528	2.045
	40	37.057	11.957
	3.01	3.814	2.291
	20.73	0	1.953
		8.297	21.413
	31.43	15.945	8.797
	22.31	49.899	5.417
	31.22		7.407
	34.78	8.584	6.74
	30.96	7.125	6.203
	9.31	11.997	6.953
	24.1	0.00083	4.497
	24.44	13.134	2.663
		15.945	14.931
	86.42	11.659
	1.4	0.774	3.045
	11.82	8.297	13.191
	8.97	5.332	15.255
	42.95	37.349	3.066
	2.66	7.595	29.511
	3.01	0.843	17.554
	60.07	8.584	2.291
	37.48	13.496	1.828
	6.46	5.711	3.27
	25.02	3.743	5.356
	8.88	1.548	1.507
	1.43	8.366	1.134
		11.976	18.104
	23.96		4.086
	22.07		4.145
	32.91
	12.53		1.909
	81.03		3.327
	54.71		5.29
	51.34		17.846
	0		8.82
	46.97		1.637
	27.7		1.79
	55.89		1.273
	49.24		3.865
			2.643
			15.945
			17.176
			36.469
			19.872
			10.376
			4.014
			9.689
			16.314
			8.471
			6.483
			13.851
			13.69
			19.983
			12.609
			7.595
			1.909
			13.523
			4.447
			13.241
			10.305
			9.488
			4.467
			15.446
			14.281
			12.875
			1.45
			4.514
			2.121

## Sheet: Fig 2 S1D
width / length
uncut	segM1 8hpa	segM1 12hpa	segM1 15hpa	segM1 24hpa
0.259916	0.456076	0.445468	0.592724	0.0947474
0.311616	0.4678	0.287662	0.310298	0.143141
0.377327	0.336134	0.262262	0.275766	0.181227
0.389198	0.355581	0.46396	0.336595	0.122761
0.505435	0.574946	0.36044	0.392352	0.212094
0.243426	0.565421	0.324344	0.318473	0.13285
0.543044	0.339861	0.280065	0.28406	0.141894
0.579947	0.301209	0.251783	0.312288	0.194713
0.359944	0.335959	0.569449	0.228864	0.120257
0.342452	0.345104	0.402547	0.270965	0.132022
0.289325	0.323826	0.35374	0.307688	0.187579
0.433338	0.164791	0.18678	0.3456	0.240373
0.353545		0.249632	0.259269	0.197285
0.421671	0.35779	0.296606	0.314406	0.14486
0.39648	0.479261		0.232622	0.204249
0.399353	0.252203	0.420061	0.289644	0.141214
0.334395	0.47272	0.593801	0.517489	0.168075
0.177479	0.427632	0.307303	0.345833	0.192039
0.31965	0.599145	0.195195	0.312129
0.310129	0.314404	0.229991		0.121139
0.5527	0.401235	0.221372	0.209233	0.122928
0.433392	0.385911	0.233098	0.221989	0.0868975
0.248202	0.326729	0.178621	0.226805	0.22291
0.37242	0.405322	0.300486	0.227272	0.13337
0.398937	0.309177	0.155226	0.236982	0.192868
0.25256	0.402051	0.24714	0.249995	0.13074
0.401499		0.425983	0.275974	0.174263
0.18578	0.258719	0.292443	0.295226	0.110018
0.475049	0.221028	0.385112	0.303941	0.139066
0.449863	0.551351	0.425193	0.344943	0.108169
0.171252	0.280281	0.220743	0.358429	0.146782
0.359697	0.39774		0.409933	0.123136
0.405351		0.421827		0.190177
0.415618	0.343071	0.252072	0.191977	0.131524
0.389206	0.381374	0.313869	0.204319	0.175312
0.317641	0.423132	0.401452	0.214025
0.307303	0.519936	0.316431	0.22168	0.277641
0.30793	0.443326	0.320133	0.249401	0.202071
0.408742	0.512937	0.304556	0.285331	0.187454
0.371992	0.378203	0.275499	0.302785	0.129022
0.241963	0.286768	0.262713	0.341174	0.191096
0.264889	0.212212	0.53706	0.358407	0.148991
0.50761	0.539414	0.383487	0.397979	0.232223
0.151702	0.445813	0.488246		0.149529
0.359291	0.418502	0.295218	0.149234	0.175113
0.221163	0.488987	0.488172	0.151101	0.184284
0.366715	0.327721	0.381975	0.247611	0.215037
0.304301	0.316998	0.393064	0.258916	0.157809
0.386775	0.376088		0.296757	0.273896
0.365659	0.369238	0.219003	0.299611	0.101915
0.470661	0.4168	0.245298	0.314961	0.224662
0.308652	0.452793	0.187831	0.326685	0.13174
0.376483	0.353055	0.333015	0.423151	0.201824
0.234053	0.546289	0.426894	0.43104	0.198146
	0.474753	0.326629
		0.395472	0.196462	0.167774
	0.409683	0.310692	0.205745	0.144484
	0.2527	0.330732	0.230222	0.167974
	0.391568	0.383726	0.238343	0.189937
	0.330569	0.434846	0.24502	0.201823
	0.42087	0.317157	0.253618	0.339674
	0.333949	0.321107	0.260344	0.180424
	0.488186		0.289493	0.229073
	0.230663	0.29988	0.292104	0.224529
	0.425532	0.313135	0.305232	0.235086
	0.270396	0.349985	0.337034	0.212198
	0.301819	0.365338	0.363481	0.220127
	0.327829	0.253237	0.408566	0.150014
	0.334683	0.310328	0.439284	0.215763
	0.414691	0.3429		0.18092
		0.269538	0.203536	0.196939
	0.326803		0.21737	0.245814
	0.343364	0.297096	0.235654
	0.485003	0.469968	0.237347	0.295073
	0.402754	0.158453	0.238255	0.172301
	0.507463	0.183351	0.250008	0.195889
	0.377939	0.377596	0.32579	0.0963798
	0.404664	0.231489	0.419561	0.219358
	0.278523	0.340111	0.533591	0.18672
	0.59308	0.356162		0.271239
	0.400948	0.354016	0.195976	0.260207
	0.261414	0.304102	0.226771	0.195931
	0.347242	0.422113	0.227546	0.25516
	0.346176	0.461934	0.25547	0.273609
	0.447234	0.518629	0.258851	0.162947
	0.334405	0.436856	0.273253	0.291854
	0.387185	0.573048	0.281567
		0.33627	0.30904	0.265468
	0.369542	0.281491	0.315351	0.204747
	0.405059		0.327172	0.138826
	0.461252	0.343892	0.346141	0.225225
	0.303516	0.421835	0.348821	0.194667
	0.377682	0.424004	0.353095	0.166213
	0.395377	0.405925	0.463511	0.213051
	0.361131	0.391823	0.546429	0.258831
	0.240159	0.633792		0.270388
	0.241953	0.348663	0.153476	0.283368
	0.466471	0.29242	0.178498	0.288202
	0.419514	0.310596	0.180958	0.237293
	0.315889	0.435978	0.197391	0.259908
	0.362734	0.418745	0.207859	0.134777
	0.333537	0.561549	0.211765	0.400212
	0.243663	0.612518	0.290664	0.173094
	0.266096	0.389563	0.291542	0.174443
	0.296467	0.338346	0.304286
	0.42407	0.488153	0.323075	0.162825
	0.464582	0.418958	0.341463	0.145876
		0.535067	0.499686	0.297822
	0.289967		0.532186	0.242915
	0.27474	0.285721	0.559484	0.309955
	0.524543	0.294012		0.186535
	0.490236	0.354986	0.180758	0.154285
	0.259467	0.287723	0.191221	0.126063
	0.381492	0.214945	0.197981	0.241715
	0.322884	0.26682	0.206386
	0.402089	0.338849	0.213936	0.256272
		0.502406	0.226522	0.3177
	0.338303	0.301595	0.249913	0.192951
	0.295101	0.301618	0.250594	0.282076
	0.393889	0.420386	0.290654	0.246762
	0.405513	0.393385	0.386292	0.289951
	0.386154	0.370738	0.393912	0.222048
	0.450763		0.418641	0.211262
	0.543124	0.244819	0.480913	0.147664
	0.261464	0.331125	0.49169	0.241512
	0.400107	0.349813	0.533779	0.169166
	0.281803	0.321133		0.164346
	0.328878	0.384607	0.221488	0.252271
	0.193866	0.279233	0.255493	0.227831
	0.307718	0.315779	0.25607	0.164002
		0.523939	0.286016	0.225191
	0.488217	0.319206	0.302046	0.190169
	0.437561	0.406614	0.328345	0.180147
	0.268401	0.355922	0.328752	0.17339
	0.270515	0.379312	0.338445	0.168748
	0.334938	0.391137	0.40011
	0.387828	0.306417	0.442915	0.188356
	0.488889	0.376781		0.166406
	0.57241	0.401233	0.185687	0.134222
	0.39641		0.190079	0.209786
	0.300551	0.272955	0.205843	0.180082
	0.408918	0.360123	0.206295	0.298026
	0.384009	0.328258	0.222822	0.123518
		0.389649	0.236343	0.222722
		0.317221	0.249422	0.113746
		0.337082	0.253413	0.207266
		0.429925	0.265549	0.249071
		0.58082	0.271112	0.27875
		0.350757	0.273741	0.152466
		0.270262	0.291975
		0.226465	0.303845	0.187762
		0.637258	0.316127	0.15692
		0.289354	0.320372	0.129899
		0.498648	0.328538	0.251971
		0.436566	0.332091	0.250575
		0.215371	0.344107	0.2539
		0.398669	0.348974	0.203098
		0.357557	0.360244	0.181496
		0.278129	0.367927	0.119119
		0.499705	0.370062	0.225229
			0.370114	0.18156
			0.386089	0.186145
			0.386593	0.153052
			0.392832	0.3
			0.461897	0.318952
			0.494376	0.183398
				0.146236
			0.137351	0.125037
			0.198626	0.172862
			0.202873	0.213016
			0.20615	0.174478
			0.251386	0.145564
			0.259979	0.168514
			0.270204
			0.277337	0.186821
			0.279121	0.252713
			0.298232	0.321298
			0.3	0.207147
			0.324618	0.179127
			0.325978	0.199891
			0.368593	0.261671
			0.396828	0.2
			0.407657	0.233706
			0.485811	0.196668
			0.488189	0.176662
			0.499486	0.117452
			0.512491
