# Supplementary material for: Zebrafish fin regeneration involves generic and regeneration-specific osteoblast injury responses
Source: eLife. 2022 Jun 24;11:e77614. doi: 10.7554/eLife.77614 (PMC9259016; doi:10.7554/eLife.77614)
Supplement: Figure 3—source data 1. [file elife-77614-fig3-data1.xlsx]

## Sheet: Fig 3A
width / length
control seg-3	cytD seg-3	control seg-2	cytD seg-2	control seg-1	cytD seg-1
0.329146	0.384153	0.294397	0.38834	0.168098	0.196785
0.205834	0.345852	0.124472	0.386433	0.233528	0.137792
0.415897	0.257587	0.261501	0.760894	0.141037	0.260187
0.317663	0.290576	0.244001	0.342026	0.175677	0.196345
0.303071	0.734508	0.237066	0.577437	0.198878	0.13375
0.235881	0.511709	0.12	0.730076	0.206796	0.344919
0.386443	0.756443	0.175619	0.520417	0.132969	0.239843
0.539156	0.702873	0.157266	0.800667	0.125858	0.332211
0.297951	0.43754	0.215334	0.726718	0.215316	0.140201
0.257247	0.402919	0.198231	0.640697	0.219616	0.086954
0.393873	0.455496	0.176673	0.819261	0.159627	0.100192
0.303443	0.700395	0.226767	0.591825	0.186506	0.236558
0.577334	0.677921	0.229916	0.572709	0.303506	0.0955061
0.397296	0.364875	0.555749	0.296445	0.310851	0.299045
0.360138	0.179755	0.455923	0.308875	0.415668	0.187772
0.486055	0.346855	0.204699	0.350039	0.3042	0.338019
0.429036	0.295718	0.389755	0.269219	0.160321	0.230787
0.359495	0.591774	0.604412	0.309067	0.194219	0.150667
0.327082	0.422602	0.277836	0.284759	0.204449	0.271099
0.328437	0.344435	0.388045	0.193444	0.188742	0.196807
0.447469	0.495229	0.344801	0.325618	0.186584	0.368381
0.347869	0.204713	0.439872	0.176687	0.0585012	0.410278
0.452424	0.301612	0.292911	0.208553	0.145361	0.165101
0.482647	0.390721	0.36347	0.333027	0.146722	0.200145
0.360734	0.311966	0.411749	0.306745	0.169387	0.202034
0.465494	0.293377	0.410578	0.294005	0.0996343	0.573164
0.18573	0.425014	0.187903	0.393614	0.187129	0.166447
0.309947	0.401113	0.416951	0.290977	0.176426	0.335412
0.458998	0.460463	0.311316	0.344319	0.105139	0.311449
0.343424	0.287669	0.357922	0.435214	0.161755	0.41675
0.32776	0.474251	0.388536	0.318651	0.153693	0.262558
0.442482	0.282656	0.385911	0.352555	0.217842	0.243144
0.418092	0.262788	0.572653	0.473512	0.186429	0.218676
0.376733	0.36801	0.406381	0.529926	0.2578	0.250165
0.269049	0.335285	0.260504	0.461896	0.152897	0.377124
0.365734	0.468834	0.246893	0.235437	0.172448	0.183904
0.36323	0.402937	0.271088	0.38685	0.310675	0.220412
0.235521	0.424464	0.350018	0.477863	0.279736	0.287309
0.404656	0.224414	0.781599	0.270333	0.223584	0.246656
0.387728	0.280858	0.59479	0.320984	0.249377	0.233267
0.500206	0.307673	0.370529	0.468947	0.411472	0.314637
0.304044	0.3333	0.322982	0.28574	0.296257	0.290157
0.471113	0.340469	0.528466	0.320078	0.237361	0.269287
0.406764	0.228005	0.419039	0.19909	0.223471	0.302073
0.191636	0.352963	0.364325	0.412859	0.245044	0.382354
0.389773	0.349054	0.306567	0.508613	0.269187	0.296202
0.267245	0.324048	0.423091	0.405385	0.281441	0.508014
0.553375	0.352555	0.385178	0.486981	0.238984	0.53543
0.535563	0.311241	0.336547	0.318059	0.255422	0.331206
0.540626	0.262242	0.360821	0.400088	0.168229	0.195445
0.549409	0.317766	0.331957	0.329886	0.111224	0.163804
0.376186	0.332023	0.293207	0.335753	0.231293	0.471914
0.401984	0.687243	0.278755	0.295565	0.165261	0.371795
0.41601	0.514203	0.385006	0.278316	0.112071	0.348457
0.370823	0.252592	0.379099	0.263333	0.151062	0.51114
0.471655	0.327164	0.390032	0.252406	0.186675	0.373444
0.41378	0.255299	0.255135	0.282602	0.237182	0.372703
0.329118	0.227415	0.310423	0.314348	0.205716	0.4782
0.534577	0.359139	0.38464	0.263708	0.23267	0.294275
0.328516	0.34307	0.315247	0.402756	0.096068	0.263233
0.286794	0.340164	0.230284	0.289456	0.193555	0.337438
0.3336	0.37962	0.350132	0.245807	0.188406	0.318392
0.332521	0.513432	0.39169	0.364615	0.304006	0.648785
0.398124	0.343415	0.445096	0.292409	0.236644	0.565696
0.478154	0.310145	0.457718	0.204572	0.127027	0.482274
0.246214	0.472153	0.434228	0.359494	0.198575	0.270931
0.27439	0.540686	0.506849	0.295183	0.241732	0.446423
0.221693	0.442033	0.376773	0.291843	0.230832	0.505956
0.368809	0.349624	0.370591	0.43565	0.229548	0.417717
0.233214	0.221273	0.296464	0.543346	0.136644	0.508263
0.353665	0.301779	0.356236	0.24288	0.176286	0.321389
0.384115	0.271513	0.289509	0.428172	0.343159	0.162554
0.232057	0.17767	0.496617	0.562922	0.331878	0.268145
0.436804	0.375157	0.279531	0.248118	0.280566	0.249878
0.202388	0.395391	0.484974	0.265885	0.148058	0.40459
0.210614	0.306318	0.358333	0.329751	0.269801	0.385728
0.345314	0.29015	0.288923	0.345196	0.294762	0.446515
0.348775	0.346485	0.328411	0.253835	0.315257	0.277498
0.435792	0.333254	0.360412	0.33226	0.383902	0.363453
0.322713	0.4959	0.346843	0.354097	0.221587	0.411246
0.35226	0.362992	0.221665	0.327148	0.172233	0.271078
0.23467	0.275851	0.355879	0.269488	0.170333	0.518917
0.246197	0.291963	0.295035	0.433277	0.233081	0.30719
0.377703	0.372186	0.181673	0.312851	0.298134	0.225777
0.46441	0.351845	0.437473	0.333892	0.17529	0.422299
0.493646	0.410915	0.343405	0.342531	0.185513	0.267865
0.55502	0.411408	0.413484	0.352859	0.298311	0.288555

## Sheet: Fig 3B
angular deviation
control seg-3	cytD seg-3	control seg-2	cytD seg-2	control seg-1	cytD seg-1
20.309	22.514	24.481	17.509	8.695	5.729
28.377	31.295	34.063	50.291	17.008	11.299
58.536	54.583	27.643	36.843	14.21	12.695
5.372	39.013	24.764	44.091	18.004	9.124
21.739	33.097	15.52	29.031	20.911	7.607
24.851	21.464	26.466	23.492	8.942	9.031
14.771	27.608	27.183	31.518	8.724	10.587
61.519	49.632	17.288	12.914	17.145	7.012
48.98	25.483	18.053	30.387	7.411	8.941
32.006	31.488	18.225	21.522	8.372	15.805
30.494	23.516	17.983	35.432	10.151	11.299
38.826	33.815	16.391	28.525	10.406	8.593
14.672	10.729	9.62	8.923	7.011	10.275
22.03	22.595	14.139	15.175	4.638	11.299
20.859	14.558	8.338	19.133	4.753	8.319
22.788	20.671	12.789	8.31	4.213	8.562
20.869	14.843	14.153	15.305	4.427	11.13
15.577	10.208	10.444	12.091	10.174	8.486
17.878	9.103	15.551	11.434	10.914	4.478
8.541	24.165	11.566	8.652	5.97	6.003
15.706	30.628	12.674	15.947	12.945	5.435
10.424	17.3	14.303	16.165	7.543	11.74
13.21	22.929	12.411	18.01	5.198	6.572
11.989	14.521	8.534	10.313	6.811	17.024
13.709	50.699	10.497	14.917	8.744	8.119
10.092	14.522	11.901	10.331	4.704	8.502
17.737	23.24	11.025	18.418	8.332	13.678
16.47	20.152	13.457	13.866	7.811	15.931
19.203	18.013	28.79	15.117	10.321	19.965
14.685	13.108	37.988	15.923	13.638	15.381
16.843	19.801	14.064	22.294	6.002	4.587
13.675	14.458	9.874	15.369	6.475	13.527
15.635	12.112	16.15	13.889	7.027	8.557
23.419	17.037	16.445	18.445	6.37	5.261
18.467	17.269	10.61	27.951	6.345	11.029
19.909	13.05	40.142	10.333	3.983	21.876
22.387	15.829	12.367	17.589	1.486	11.509
11.59	22.64	12.08	12.84	8.82	12.94
28.06	19.99	9.94	14.57	8.44	18.32
20.38	18.05	7.81	18.7	11.4	21.34
21.03	19.51	14.57	26.96	10.15	11.25
12.52	15.61	8.01	23.44	6.64	34.29
12.15	21.75	12.85	20.72	10.67	24.54
27.33	20.33	16.92	16.22	6.42	16.46
18.06	22.83	10.74	21.86	10.44	18.34
32.16	21.64	15.02	32.91	10.01	15.91
22.91	18	24.98	15.38	9.39	32.77
36.46	18.43	15.07	13.97	3.06	22.58
17.45	30.71	10.53	18.38	1.65	19.43
20.75	18.55	19.22	24.15	5.79	26.33
16.39	18.04	24.4	9.23	1.54	14.26
24.32	15.38	21.73	27.86	3.49	12.61
16.72	26.32	10.43	27.33	18.06	19.86
15.78	17.21	12.81	18.14	10.56	29.07
29.56	17.36	11.49	17.37	7.99	24.73
21.62	17.75	13.1	26.75	7.16	18.15
10.06	22.97	17.39	12.1	12.09	14.36
23.46	18.48	24.86	18.8	11.74	15.77
21.96	17.65	18.71	16.24	9.1	21.05
17.76	16.79	18.05	22.43	9.86	11.31
10.2	21.2	20.76	11.03	14.04	37.32
7.23	18.85	15.17	13.74	14.28	8.09
18.99	14.01	16.75	24.56	10.43	21.5
8.07	20.27	21.84	26.04	13.37	16.61
9.99	13.5	22	20.22	11.98	16.95
9.71	19.59	16.04	26.46	11.48	12.99
18.39	14.6	10.64	13.48	8.58	5.73
12.01	22.92	14.21	24.22	7.24	17.42
11.85	23.8	10.84	21.47	10.34	18.44
12.12	26.46	14.44	27.26	7.84	18.94
29.74	15.8	9.67	16.39	8.01	28.61
35.27	19.32	18.49	12.1	12.51	8.76
12.77	27.99	17.37	7.13	5.46	19.86
15.33	23.32	28.03	9.09	5.88	13.03
19.82	15.81	33.52	11.2	12.06	20.38
17.56	22.56	13.67	9.75	10.5	8.44
13.22	20.34	19.91	16.65	0.78	22.17
15.43	25.44	13.84	20.79	11.27	25.21
17.06	17.43	18.43	21.09	13.83	19.02
14.74	22.22	29.84	17.16	3.73	29.07
13.53	14.27	13.55	23.96	4.79	18
15.09	15.4	19.45	17.61	4.03	10.54
21.04	17.92	14.04	18.43	4.92	24.57
27.92	14.54	23.2	16.35	3.28	19.41
15.48	14.87	15.68	36.3	5.37	27.41
24.3	19.65	13.58	25.35	11.16	19.09
26.02	15.38	17.43	10.89	8.57	13.13
30.96	16.34	13.24	16.83	1.9	22.25
16.14	15.44	14.17	9.07	7.32	27.19
23.66	15.55	25.19	2.39	5.88	25.56
30.38	18.03	16.31	13.67	6.77	17.1
24.59	10.62	11.4	27.11	7.15	24.1
20.96	14.38	10.92	32.44	6.25	29.93

## Sheet: Fig 3C
MC_016										MC_019									MC_021									MC_017
	0dpa	1dpa	distance 1st joint - gfp 2nd segment (µm) 0dpa	distance 1st joint - gfp 2nd segment (µm) 1dpa	D distance 1st joint 1 dpa	% distance 1st joint change	regenerate length 1dpa (µm) (nor ordered)	migration (%)			0dpa	1dpa	distance 1st joint - gfp 2nd segment (µm) 0dpa	distance 1st joint - gfp 2nd segment (µm) 1dpa	D distance 1st joint 1 dpa	% distance 1st joint change	migration (%)			0dpa	1dpa	distance 1st joint - gfp 2nd segment (µm) 0dpa	distance 1st joint - gfp 2nd segment (µm) 1dpa	D distance 1st joint	% distance 1st joint change	migration (%)			0dpa	1dpa	distance 1st joint - gfp 2nd segment (µm) 0dpa	distance 1st joint - gfp 2nd segment (µm) 1dpa	D distance 1st joint 1 dpa	% distance 1st joint change	migration (%)
blebbistatin_fish01	_	_	34.126	35.657	-1.531	4.48632	144.968	-4.48632		blebbistatin_fish01	_	_1	70.529	44.992	25.537	-36.2078	36.2078		cytD_fish01	_	_	61.99	51.08	10.91	-17.5996	17.5996		blebbistatin_fish01	_	_6	53.446	43.217	10.229	-19.1389	19.1389
blebbistatin_fish02	_1	_3	37.14	30.177	6.963	-18.748	118.75	18.748		blebbistatin_fish02	_1	_5	59.125	48.528	10.597	-17.923	17.923		cytD_fish02	_1	_3	61.53	53.11	8.42	-13.6844	13.6844		blebbistatin_fish02	_1	_5	51.562	42.187	9.375	-18.182	18.182
blebbistatin_fish03	_2	_2	75.195	53.968	21.227	-28.2293	112.673	28.2293		blebbistatin_fish03	_2	_7	51.526	37.172	14.354	-27.8578	27.8578		cytD_fish03	_2	_4	47.93	37.56	10.37	-21.6357	21.6357		blebbistatin_fish03	_2	_4	45.554	30.338	15.216	-33.4021	33.4021
blebbistatin_fish04	_3	_5	42.75	37.792	4.958	-11.5977	141.006	11.5977		blebbistatin_fish04	_3	_6	61.187	44.596	16.591	-27.1152	27.1152		cytD_fish04	_3								blebbistatin_fish04	_3	_1	31.638	27.288	4.35	-13.7493	13.7493
blebbistatin_fish05	_4	_4	25.049	15.389	9.66	-38.5644	78.312	38.5644		blebbistatin_fish05	_4	_	25.019	13.131	11.888	-47.5159	47.5159		cytD_fish05	_4								blebbistatin_fish05	_4	_2	39.094	28.513	10.581	-27.0655	27.0655
blebbistatin_fish06	_5	_1	33.657	34.517	-0.86	2.55519	131.844	-2.55519		blebbistatin_fish06	_5	_2	60.273	39.9	20.373	-33.8012	33.8012		cytD_fish06	_5	_1	54.69	50.17	4.52	-8.26477	8.26477		blebbistatin_fish06	_5	_7	43.75	31.289	12.461	-28.4823	28.4823
blebbistatin_fish01	_	_	46.456	47.109	-0.653	1.40563	112.673	-1.40563		blebbistatin_fish07	_6	_4	60.644	36.906	23.738	-39.1432	39.1432		cytD_fish07	_6	_2	58.47	57.26	1.21	-2.06944	2.06944		blebbistatin_fish07	_6	_3	43.75	42.905	0.845	-1.93143	1.93143
blebbistatin_fish02	_1	_3	86.631	20.025	66.606	-76.8847	87.723	76.8847		blebbistatin_fish08	_7	_10	62.58	43.437	19.143	-30.5896	30.5896		cytD_fish08	_7								blebbistatin_fish08	_7	_	53.125	33.437	19.688	-37.0598	37.0598
blebbistatin_fish03	_2	_2	47.931	26.723	21.208	-44.2469	71.261	44.2469		blebbistatin_fish09	_8	_3	43.714	29.241	14.473	-33.1084	33.1084		cytD_fish09	_8								blebbistatin_fish01	_	_6	44.47	34.457	10.013	-22.5163	22.5163
blebbistatin_fish04	_3	_5	42.072	40.932	1.14	-2.70964	106.434	2.70964		blebbistatin_fish10	_9	dead	66.585						cytD_fish10	_9								blebbistatin_fish02	_1	_5	40.625	33.402	7.223	-17.7797	17.7797
blebbistatin_fish05	_4	_4	33.437	28.125	5.312	-15.8866	50	15.8866		blebbistatin_fish11	_10	_9	48.137	44.596	3.541	-7.35609	7.35609		cytD_fish01	_	_	58.02	39.92	18.1	-31.1961	31.1961		blebbistatin_fish03	_2	_4	42.187	35.252	6.935	-16.4387	16.4387
blebbistatin_fish06	_5	_1	48.811	47.399	1.412	-2.89279	87.5	2.89279		blebbistatin_fish12	_11	_8	41.751	21.571	20.18	-48.3342	48.3342		cytD_fish02	_1	_3	56.86	33.34	23.52	-41.3648	41.3648		blebbistatin_fish04	_3	_1	41.014	40.565	0.449	-1.09475	1.09475
										blebbistatin_fish01	_	_1	43.47	39.9	3.57	-8.21256	8.21256		cytD_fish03	_2	_4	56.95	43.73	13.22	-23.2133	23.2133		blebbistatin_fish05	_4	_2	34.375	35.501	-1.126	3.27564	-3.27564
cytochalasinD_fish01	_	_3	93.502	60.677	32.825	-35.1062	134.919	35.1062		blebbistatin_fish02	_1	_5	18.697	20.215	-1.518	8.11895	-8.11895		cytD_fish04	_3								blebbistatin_fish06	_5	_7	53.331	29.357	23.974	-44.9532	44.9532
cytochalasinD_fish02	_1	_5	46.875	25	21.875	-46.6667	112.673	46.6667		blebbistatin_fish03	_2	_7	46.667	27.707	18.96	-40.6283	40.6283		cytD_fish05	_4								blebbistatin_fish07	_6	_3	39.094	36.777	2.317	-5.92674	5.92674
cytochalasinD_fish03	_2	_	47.931	37.792	10.139	-21.1533	120.708	21.1533		blebbistatin_fish04	_3	_6	43.47	34.611	8.859	-20.3796	20.3796		cytD_fish06	_5	_1	59.51	46.53	12.98	-21.8115	21.8115		blebbistatin_fish08	_7	_	49.559	47.29	2.269	-4.57838	4.57838
cytochalasinD_fish04	_3	_4	53.148	34.517	18.631	-35.0549	77.308	35.0549		blebbistatin_fish05	_4	_	38.698	24.86	13.838	-35.759	35.759		cytD_fish07	_6	_2	57.26	55.14	2.12	-3.70241	3.70241
cytochalasinD_fish05	_4	_1	38.432	41.103	-2.671	6.94994	122.793	-6.94994		blebbistatin_fish06	_5	_2	51.846	41.009	10.837	-20.9023	20.9023		cytD_fish08	_7								control_fish01	_	_4	40.338	18.75	21.588	-53.5178	53.5178
cytochalasinD_fish06	_5	_2	40.745	37.469	3.276	-8.04025	68.75	8.04025		blebbistatin_fish07	_6	_4	43.279	35.114	8.165	-18.866	18.866		cytD_fish09	_8								control_fish02	_1	_6	59.313	30.655	28.658	-48.3166	48.3166
cytochalasinD_fish01	_	_3	52.408	44.988	7.42	-14.1581	106.434	14.1581		blebbistatin_fish08	_7	_10	53.681	29.782	23.899	-44.5204	44.5204		cytD_fish10	_9								control_fish03	_2	_1	53.75	27.288	26.462	-49.2316	49.2316
cytochalasinD_fish02	_1	_5	69.351	74.736	-5.385	7.76485	62.5	-7.76485		blebbistatin_fish09	_8	_3	51.088	27.707	23.381	-45.7661	45.7661											control_fish04	_3	_	49.336	10.338	38.998	-79.0457	79.0457
cytochalasinD_fish03	_2	_	84.563	41.926	42.637	-50.4204	106.25	50.4204		blebbistatin_fish10	_9	dead	55.943						control_fish01	_	_3	56.67	29.87	26.8	-47.2913	47.2913		control_fish05	_4	_2	52.872	22.85	30.022	-56.7824	56.7824
cytochalasinD_fish04	_3	_4	39.836	28.168	11.668	-29.2901	25.769	29.2901		blebbistatin_fish11	_10	_9	46.743	19.98	26.763	-57.2556	57.2556		control_fish02	_1	_1	52.54	22.61	29.93	-56.9661	56.9661		control_fish06	_5	_5	62.52	23.861	38.659	-61.8346	61.8346
cytochalasinD_fish05	_4	_1	65.289	61.257	4.032	-6.17562	81.25	6.17562		blebbistatin_fish12	_11	_8	63.683	43.033	20.65	-32.4262	32.4262		control_fish03	_2	_5	66.7	36.71	29.99	-44.9625	44.9625		control_fish07	_6	_3	45.313	25.195	20.118	-44.3979	44.3979
cytochalasinD_fish06	_5	_2	38.145	31.018	7.127	-18.684	69.034	18.684											control_fish04	_3	_4	63.36	26.4	36.96	-58.3333	58.3333		control_fish01	_	_4	52.303	12.812	39.491	-75.5043	75.5043
										cytochalasinD_fish01	_	_	64.567	36.917	27.65	-42.8237	42.8237		control_fish05	_4	_2	50.17	15.27	34.9	-69.5635	69.5635		control_fish02	_1	_6	45.049	20.373	24.676	-54.7759	54.7759
control_fish01	_	_2	61.277	27.452	33.825	-55.2002	130.504	55.2002		cytochalasinD_fish02	_1	_5	23.51	19.221	4.289	-18.2433	18.2433		control_fish06	_5	_	59.28	34.37	24.91	-42.0209	42.0209		control_fish03	_2	_1	31.25	17.258	13.992	-44.7744	44.7744
control_fish02	_1	_5	58.002	12.885	45.117	-77.7852	88.388	77.7852		cytochalasinD_fish03	_2	_2	44.755	44.357	0.398	-0.889286	0.889286		control_fish07	_6								control_fish04	_3	_	54.955	28.513	26.442	-48.1157	48.1157
control_fish03	_2	_4	56.445	28.168	28.277	-50.0966	125.156	50.0966		cytochalasinD_fish04	_3	_8	45.384	42.508	2.876	-6.33704	6.33704		control_fish08	_7								control_fish05	_4	_2	43.75	18.017	25.733	-58.8183	58.8183
control_fish04	_3	_1	65.971	34.587	31.384	-47.5724	89.486	47.5724		cytochalasinD_fish05	_4	_4	59.384	32.295	27.089	-45.6167	45.6167		control_fish09	_8								control_fish06	_5	_5	40.625	22.961	17.664	-43.4806	43.4806
control_fish05	_4	_3	53.331	26.746	26.585	-49.8491	87.723	49.8491		cytochalasinD_fish06	_5	_3	66.673	60.017	6.656	-9.98305	9.98305		control_fish10	_9								control_fish07	_6	_3	46.979	18.815	28.164	-59.9502	59.9502
control_fish06	_5	_	88.843	50.486	38.357	-43.1739	93.75	43.1739		cytochalasinD_fish07	_6	_1	46.337	50.813	-4.476	9.65967	-9.65967		control_fish01	_	_3	44.19	14.06	30.13	-68.1828	68.1828
control_fish01	_	_2	61.103	30.698	30.405	-49.7602	100	49.7602		cytochalasinD_fish08	_7	dead	54.576						control_fish02	_1	_1	55.75	13.27	42.48	-76.1973	76.1973
control_fish02	_1	_5	60.565	25.436	35.129	-58.0021	65.252	58.0021		cytochalasinD_fish09	_8	_6	75.37	42.201	33.169	-44.0082	44.0082		control_fish03	_2	_5	52.73	7.92	44.81	-84.9801	84.9801
control_fish03	_2	_4	87.848	21.281	66.567	-75.7752	111.803	75.7752		cytochalasinD_fish10	_9	_10	70.227	73.855	-3.628	5.1661	-5.1661		control_fish04	_3	_4	48.63	7.92	40.71	-83.7138	83.7138
control_fish04	_3	_1	66.218	41.005	25.213	-38.0757	93.75	38.0757		cytochalasinD_fish11	_10	_7	47.643	24.86	22.783	-47.8202	47.8202		control_fish05	_4	_2	43.91	27.99	15.92	-36.256	36.256
control_fish05	_4	_3	37.565	18.815	18.75	-49.9135	62.5	49.9135		cytochalasinD_fish12	_11	_9	39.124	42.285	-3.161	8.07944	-8.07944		control_fish06	_5	_	41.81	14.73	27.08	-64.7692	64.7692
control_fish06	_5	_	59.498	33.146	26.352	-44.2906	62.812	44.2906		cytochalasinD_fish01	_	_	64.549	38.537	26.012	-40.2981	40.2981		control_fish07	_6
										cytochalasinD_fish02	_1	_5	55.178	36.172	19.006	-34.4449	34.4449		control_fish08	_7
										cytochalasinD_fish03	_2	_2	47.172	37.742	9.43	-19.9907	19.9907		control_fish09	_8
										cytochalasinD_fish04	_3	_8	43.497	46.204	-2.707	6.22342	-6.22342		control_fish10	_9
										cytochalasinD_fish05	_4	_4	30.891	21.537	9.354	-30.2807	30.2807
										cytochalasinD_fish06	_5	_3	50.566	33.249	17.317	-34.2463	34.2463
										cytochalasinD_fish07	_6	_1	67.902	58.422	9.48	-13.9613	13.9613
										cytochalasinD_fish08	_7	dead	72.641
										cytochalasinD_fish09	_8	_6	62.41	38.443	23.967	-38.4025	38.4025
										cytochalasinD_fish10	_9	_10	73.93	55.541	18.389	-24.8735	24.8735
										cytochalasinD_fish11	_10	_7	43.033	22.295	20.738	-48.1909	48.1909
										cytochalasinD_fish12	_11	_9	64.714	27.493	37.221	-57.5161	57.5161
										control_fish01	_	_10	61.878	36.174	25.704	-41.5398	41.5398
										control_fish02	_1	_4	31.12	3.074	28.046	-90.1221	90.1221
										control_fish03	_2	_1	61.725	34.596	27.129	-43.9514	43.9514
										control_fish04	_3	_7	53.988	2.173	51.815	-95.975	95.975
										control_fish05	_4	_9	41.808	19.01	22.798	-54.5302	54.5302
										control_fish06	_5	_6	39.393	1.537	37.856	-96.0983	96.0983
										control_fish07	_6	_5	63.012	1.537	61.475	-97.5608	97.5608
										control_fish08	_7	_2	35.482	15.446	20.036	-56.4681	56.4681
										control_fish09	_8	_3	41.949	6.148	35.801	-85.3441	85.3441
										control_fish10	_9	_	69.433	22.005	47.428	-68.3076	68.3076
										control_fish11	_10	_8	64.219	25.85	38.369	-59.7471	59.7471
										control_fish01	_	_10	58.179	29.201	28.978	-49.8084	49.8084
										control_fish02	_1	_4	58.825	33.879	24.946	-42.4071	42.4071
										control_fish03	_2	_1	31.684	3.074	28.61	-90.2979	90.2979
										control_fish04	_3	_7	66.234	34.366	31.868	-48.1143	48.1143
										control_fish05	_4	_9	69.347	29.201	40.146	-57.8915	57.8915
										control_fish06	_5	_6	52.457	20.904	31.553	-60.1502	60.1502
										control_fish07	_6	_5	55.413	32.348	23.065	-41.6238	41.6238
										control_fish08	_7	_2	65.85	38.545	27.305	-41.4655	41.4655
										control_fish09	_8	_3	38.422	18.443	19.979	-51.9989	51.9989
										control_fish10	_9	_	52.457	2.173	50.284	-95.8576	95.8576
										control_fish11	_10	_8	57.423	3.074	54.349	-94.6467	94.6467

## Sheet: Fig 3D
width / length
control seg-3	blebb seg-3	control seg-2	blebb seg-2	control seg-1	blebb seg-1
0.329146	0.527447	0.294397	0.329104	0.168098	0.208429
0.205834	0.772744	0.124472	0.518966	0.233528	0.207014
0.415897	0.528636	0.261501	0.321127	0.141037	0.341132
0.317663	0.558847	0.244001	0.280075	0.175677	0.17091
0.303071	0.641576	0.237066	0.200099	0.198878	0.100432
0.235881	0.79863	0.12	0.153002	0.206796	0.357717
0.386443	0.585531	0.175619	0.232152	0.132969	0.417757
0.539156	0.537089	0.157266	0.237273	0.125858	0.299071
0.297951	0.311548	0.215334	0.177615	0.215316	0.27077
0.257247	0.450286	0.198231	0.227311	0.219616	0.298384
0.393873	0.465446	0.176673	0.149251	0.159627	0.3031
0.303443	0.341387	0.226767	0.193427	0.186506	0.202567
0.577334	0.461647	0.229916	1.00483	0.303506	0.315643
0.397296	0.458414	0.555749	0.333759	0.310851	0.308051
0.360138	0.392572	0.455923	0.492269	0.415668	0.303155
0.486055	0.498178	0.204699	0.276145	0.3042	0.340167
0.429036	0.419329	0.389755	0.701565	0.160321	0.248906
0.359495	0.31395	0.604412	0.441389	0.194219	0.415507
0.327082	0.40117	0.277836	0.267712	0.204449	0.307962
0.328437	0.34241	0.388045	0.377368	0.188742	0.157994
0.447469	0.180693	0.344801	0.308797	0.186584	0.293822
0.347869	0.196697	0.439872	0.294957	0.0585012	0.250985
0.452424	0.309281	0.292911	0.457003	0.145361	0.302978
0.482647	0.153565	0.36347	0.416677	0.146722	0.271871
0.360734	0.220506	0.411749	0.376821	0.169387	0.227684
0.465494	0.2696	0.410578	0.395912	0.0996343	0.296067
0.18573	0.418684	0.187903	0.234151	0.187129	0.336085
0.309947	0.488397	0.416951	0.374636	0.176426	0.307906
0.458998	0.376579	0.311316	0.283143	0.105139	0.410061
0.343424	0.328003	0.357922	0.363632	0.161755	0.312218
0.32776	0.388279	0.388536	0.323393	0.153693	0.28653
0.442482	0.340588	0.385911	0.39544	0.217842	0.351888
0.418092	0.404184	0.572653	0.463378	0.186429	0.309199
0.376733	0.345256	0.406381	0.224948	0.2578	0.34473
0.269049	0.285489	0.260504	0.393164	0.152897	0.299983
0.365734	0.413525	0.246893	0.397655	0.172448	0.197178
0.36323	0.360084	0.271088	0.50422	0.310675	0.14987
0.235521	0.301255	0.350018	0.389947	0.279736	0.260618
0.404656	0.362575	0.781599	0.34092	0.223584	0.349848
0.387728	0.394668	0.59479	0.472073	0.249377	0.347903
0.500206	0.356838	0.370529	0.336242	0.411472	0.393714
0.304044	0.5046	0.322982	0.29604	0.296257	0.413401
0.471113	0.341742	0.528466	0.557507	0.237361	0.375145
0.406764	0.568359	0.419039	0.375713	0.223471	0.300898
0.191636	0.606528	0.364325	0.340325	0.245044	0.226533
0.389773	0.545201	0.306567	0.522064	0.269187	0.374551
0.267245	0.202872	0.423091	0.235171	0.281441	0.26991
0.266937	0.541548	0.604994	0.32559	0.157906	0.333497
0.383072	0.463993	0.608581	0.323798	0.158647	0.299335
0.399913	0.356364	0.578905	0.28751	0.140999	0.310741
0.345432	0.600373	0.419991	0.250856	0.164762	0.5847
0.350948	0.465696	0.365909	0.456245	0.198433	0.253521
0.337134	0.412008	0.262864	0.338203	0.318242	0.273982
0.337074	0.275101	0.239014	0.42868	0.172956	0.232381
0.286507	0.316374	0.349933	0.371099	0.212337	0.404688
0.313904	0.425982	0.378412	0.367883	0.331122	0.30924
0.342013	0.429187	0.409843	0.244303	0.173481	0.293876
0.575923	0.455293	0.322344	0.355939	0.171543	0.167283
0.331815	0.240124	0.357042	0.354617	0.223845	0.278221
0.366964	0.358659	0.357339	0.430179	0.190025	0.22188
0.416751	0.525876	0.234616	0.363976	0.266975	0.225719
0.344349	0.512791	0.27198	0.49916	0.174415	0.275039
0.308561	0.465603	0.252598	0.346544	0.193512	0.283696
0.432836	0.395955	0.211655	0.273025	0.249665	0.318675
0.328716	0.363711	0.238767	0.291522	0.235132	0.290115
0.294722	0.386499	0.390172	0.458984	0.10733	0.538317
0.595803	0.326027	0.277195	0.409047	0.100585	0.523239
0.297243	0.38708	0.380293	0.413526	0.154173	0.360642
0.351933	0.354545	0.555556	0.408745	0.263952	0.3933
0.469355	0.47108	0.442446	0.412308	0.239822	0.360831
0.53582	0.376798	0.495009	0.370199	0.133538	0.541655
0.365725	0.529206	0.500566	0.398786	0.23994	0.322202
0.459701	0.412776	0.476134	0.448593	0.183493	0.447646
0.379165	0.414462	0.413373	0.352936	0.157746	0.345651
0.383627	0.31082	0.525818	0.400411	0.210235	0.33562
0.508993	0.449114	0.375986	0.361159	0.15268	0.33739
0.367464	0.324012	0.287076	0.263438	0.182741	0.254618
0.397777	0.428664	0.312716	0.244315	0.203114	0.378646
0.512591	0.413136	0.376379	0.565617	0.186813	0.378869
0.480119	0.540541	0.492465	0.259734	0.280747	0.353346
0.513564	0.394418	0.406309	0.346659	0.322001	0.393206
0.443688	0.430798	0.382846	0.369666	0.345588	0.361582
0.322647	0.571787	0.343086	0.466819	0.23002	0.570681
0.583236	0.470928	0.309481	0.291491	0.276123	0.576281
0.381175	0.440794	0.320906	0.317261	0.25161	0.612159
0.316704	0.510638	0.39104	0.545576	0.328675	0.568807
0.340387	0.448052	0.360915	0.336712	0.216744	0.340804
0.597072	0.415158	0.495013	0.476899	0.165966	0.50497
0.39685	0.481233	0.461686	0.598439	0.229386	0.566851

## Sheet: Fig 3E
angular deviation
control seg-3	blebb seg-3	control seg-2	blebb seg-2	control seg-1	blebb seg-1
20.309	27.708	24.481	15.443	8.695	14.813
28.377	31.247	34.063	13.346	17.008	8.406
58.536	40.007	27.643	62.331	14.21	25.206
5.372	49.744	24.764	44.073	18.004	22.09
21.739	40.371	15.52	45.485	20.911	7.846
24.851	23.219	26.466	22.148	8.942	9.423
14.771	36.601	27.183	20.934	8.724	14.771
61.519	82.398	17.288	25.553	17.145	13.717
48.98	23.031	18.053	40.99	7.411	9.984
32.006	21.613	18.225	12.95	8.372	12.575
30.494	17.747	17.983	40.073	10.151	11.87
38.826	14.467	16.391	15.509	10.406	10.846
14.672	18.724	9.62	19.656	7.011	20.054
22.03	13.764	14.139	13.264	4.638	14.92
20.859	18.621	8.338	12.895	4.753	10.244
22.788	20.752	12.789	15.287	4.213	15.046
20.869	9.751	14.153	12.313	4.427	15.869
15.577	28.979	10.444	24.081	10.174	7.037
17.878	13.96	15.551	16.542	10.914	5.189
8.541	10.511	11.566	10.376	5.97	12.701
15.706	11.919	12.674	9.549	12.945	10.827
10.424	8.441	14.303	15.24	7.543	10.498
13.21	17.081	12.411	13.929	5.198	6.108
11.989	18.761	8.534	13.018	6.811	11.453
13.709	23.964	10.497	25.256	8.744	7.44
10.092	19.849	11.901	16.905	4.704	9.631
17.737	14.604	11.025	14.575	8.332	10.21
16.47	19.108	13.457	9.173	7.811	10.95
19.203	18.509	28.79	18.238	10.321	7.52
14.685	17.433	37.988	12.472	13.638	8.002
16.843	23.318	14.064	17.847	6.002	7.618
13.675	13.162	9.874	16.326	6.475	6.037
15.635	16.948	16.15	12.639	7.027	16.849
23.419	21.257	16.445	11.248	6.37	17.951
18.467	19.451	10.61	16.388	6.345	16.295
19.909	14.663	40.142	11.939	3.983	15.831
22.387	16.406	12.367	44.186	1.486	11.122
	16.33
21.01	17.18	22.31	16	3.03	20.14
21.16	17.05	22.92	18.43	14.52	21.67
17.1	15.35	15.12	19.33	9.54	16.31
23.97	17.77	18.07	14.47	5.92	16.39
25.31	15.26	19.61	28.14	11.37	12.86
15.58	27.58	26.06	28.44	13.94	22.93
19.67	27.21	18.89	32.47	16.05	26.66
12.38	20.07	22.33	31.72	13.67	24.3
20.73	23.75	16.01	20.65	7.59	25.79
17.59	30.42	15.32	26.57	1.68	24.23
22.61	34.05	21.85	28.14	7.28	18.05
18.1	34.37	17.05	18.67	12.89	18.27
22.9	15.93	22.46	19.52	10.62	22.77
23.62	25.87	31.21	27.07	8.17	28.67
30.87	28.19	17.16	16.5	6.2	29.48
14.94	29.58	20.08	19.34	2.8	18.43
9.19	27.01	17.53	29.93	1.8	19.29
18.04	15.98	19.86	11.32	11.77	20.68
38.66	25	19.45	13.87	3.09	17.11
23.07	27.29	15.83	18.75	0.51	22.13
26.71	28.64	16.91	19.96	7.87	12.97
20.45	30.23	28.23	11.08	7.45	23.75
20.75	28.86	12.84	28.68	6.68	21.06
31.55	35.22	25.63	25.03	7.82	24.67
16.99	26.84	15.5	13.37	8.88	31.48
18.56	22.84	20.6	34.69	11.55	23.36
21.45	27.44	19.15	24.44	7.85	23.26
22.96	33.96	17.19	31.21	12.43	28.58
20.56	21.05	15.97	23.35	10.86	29.44
35.84	19.25	15.33	20.78	13.16	29.51
17.77	36.87	30.38	23.31	5.29	20.91
16.43	9.64	17	24.26	4.77	23.96
20.78	27.08	15.52	19.46	7.26	31.97
32.78	12.69	18.04	30.42	5.44	21.63
20.8	23.84	17.47	30.72	10.76	20.9
16.31	15.35	26.65	10.48	0.39	21.3
29.87	21.88	25.47	21.8	12.01	21.71
18.97	19.72	29.48	34.1	11.69	21.63
25.94	22.2	15.95	21.17	5.1	24.07
22.11		22.04	20.85	10.85	18.34

## Sheet: Fig 3F
mean bglap intensity
control	fin01	mean	fin02	mean	fin03	mean	fin04	mean	fin05	mean	fin06	mean	fin07	mean	fin08	mean	fin09	mean	fin10	mean	fin11	mean	fin12	mean
	seg -1	128.183	seg -1		seg -1	181.186	seg -1	120.826	seg -1	66.892	seg -1	184.72	seg -1	187.032	seg -1	86.21	seg -1	24.1337	seg -1	57.7128	seg -1	64.4928	seg -1	74.828
	seg -2	297.666	seg -2		seg -2	287.325	seg -2	199.443	seg -2	305.16	seg -2	368.766	seg -2	332.523	seg -2	122.428	seg -2	79.6297	seg -2	99.8426	seg -2	116.343	seg -2	129.375
blebbistatin	fin01	mean	fin02	mean	fin03	mean	fin04	mean	fin05	mean	fin06	mean	fin07	mean	fin08	mean	fin09	mean	fin10	mean	fin11	mean	fin12	mean
	seg -1	153.394	seg -1		seg -1	89.2192	seg -1	81.9767	seg -1	110.204	seg -1	74.6084	seg -1	52.4934	seg -1	51.391	seg -1	30.1234	seg -1	41.2144	seg -1	37.5546	seg -1	30.7966
	seg -2	237.263	seg -2		seg -2	126.967	seg -2	201.593	seg -2	168.219	seg -2	112.175	seg -2	73.7316	seg -2	99.4127	seg -2	76.3908	seg -2	70.7068	seg -2	87.4265	seg -2	55.4682
cytochalasin D	fin01	mean	fin02	mean	fin03	mean	fin04	mean	fin05	mean	fin06	mean	fin07	mean	fin08	mean	fin09	mean	fin10	mean	fin11	mean	fin12	mean
	seg -1	78.8363	seg -1	28.7047	seg -1	54.7908	seg -1	101.691	seg -1	101.691	seg -1	79.2828	seg -1	54.452	seg -1	44.025	seg -1	64.9336	seg -1	54.4485	seg -1	33.7946	seg -1	160.178
	seg -2	255.825	seg -2	85.2972	seg -2	165.559	seg -2	228.94	seg -2	228.94	seg -2	149.561	seg -2	76.804	seg -2	114.032	seg -2	152.952	seg -2	108.663	seg -2	59.47	seg -2	241.426
% segM1 of segM2
control	fin01	mean	fin02	mean	fin03	mean	fin04	mean	fin05	mean	fin06	mean	fin07	mean	fin08	mean	fin09	mean	fin10	mean	fin11	mean	fin12	mean
	seg -1	43.0626	seg -1		seg -1	63.0595	seg -1	60.5815	seg -1	21.9203	seg -1	50.0915	seg -1	56.2462	seg -1	70.4168	seg -1	30.3074	seg -1	57.8038	seg -1	55.4334	seg -1	57.838
	seg -2	100	seg -2		seg -2	100	seg -2	100	seg -2	100	seg -2	100	seg -2	100	seg -2	100	seg -2	100	seg -2	100	seg -2	100	seg -2	100
blebbistatin	fin01	mean	fin02	mean	fin03	mean	fin04	mean	fin05	mean	fin06	mean	fin07	mean	fin08	mean	fin09	mean	fin10	mean	fin11	mean	fin12	mean
	seg -1	64.6513	seg -1		seg -1	70.2695	seg -1	40.6645	seg -1	65.5125	seg -1	66.511	seg -1	71.1953	seg -1	51.6946	seg -1	39.4333	seg -1	58.2892	seg -1	42.9556	seg -1	55.5211
	seg -2	100	seg -2		seg -2	100	seg -2	100	seg -2	100	seg -2	100	seg -2	100	seg -2	100	seg -2	100	seg -2	100	seg -2	100	seg -2	100
cytochalasin D	fin01	mean	fin02	mean	fin03	mean	fin04	mean	fin05	mean	fin06	mean	fin07	mean	fin08	mean	fin09	mean	fin10	mean	fin11	mean	fin12	mean
	seg -1	30.8165	seg -1	33.6526	seg -1	33.0945	seg -1	44.4182	seg -1	44.4182	seg -1	53.0103	seg -1	70.8973	seg -1	38.6075	seg -1	42.4535	seg -1	50.1075	seg -1	56.8263	seg -1	66.3468
	seg -2	100	seg -2	100	seg -2	100	seg -2	100	seg -2	100	seg -2	100	seg -2	100	seg -2	100	seg -2	100	seg -2	100	seg -2	100	seg -2	100

## Sheet: Fig 3G
Ocn_GFP+nocodazol_09112016				ROI: 2nd & third ray from up
	0dpa	1dpa	distance 1st joint - gfp segment -1 (µm) 0dpa	distance 1st joint - gfp segment -1 (µm) 1dpa	D distance 1st joint	% distance 1st joint change	migration (%)
nocodazol_fish01	_	_9	65.29	19.087	46.203	-70.7658	70.7658
nocodazol_fish02	_1	_7	55.9	27.505	28.395	-50.7961	50.7961
nocodazol_fish03	_2	_3	51.686	12.804	38.882	-75.2273	75.2273
nocodazol_fish04	_3	_4	40.372	9.317	31.055	-76.9221	76.9221
nocodazol_fish05	_4	_6	47.302	25.853	21.449	-45.3448	45.3448
nocodazol_fish06	_5	_	56.583	25.24	31.343	-55.393	55.393
nocodazol_fish07	_6	_5	58.016	6.944	51.072	-88.0309	88.0309
nocodazol_fish08	_7	_1	59.103	11.583	47.52	-80.402	80.402
nocodazol_fish09	_8	_2	49.785	20.847	28.938	-58.1259	58.1259
nocodazol_fish10	_9	_8	55.986	16.686	39.3	-70.1961	70.1961
nocodazol_fish01	_	_9	34.091	13.21	20.881	-61.2508	61.2508
nocodazol_fish02	_1	_7	56.911	13.803	43.108	-75.7463	75.7463
nocodazol_fish03	_2	_3	64.939	29.767	35.172	-54.1616	54.1616
nocodazol_fish04	_3	_4	37.675	7.037	30.638	-81.3218	81.3218
nocodazol_fish05	_4	_6	45.883	17.606	28.277	-61.6285	61.6285
nocodazol_fish06	_5	_	61.018	25.556	35.462	-58.1173	58.1173
nocodazol_fish07	_6	_5	41.178	20.903	20.275	-49.2375	49.2375
nocodazol_fish08	_7	_1	46.399	15.556	30.843	-66.4734	66.4734
nocodazol_fish09	_8	_2	58.642	28.081	30.561	-52.1145	52.1145
nocodazol_fish10	_9	_8	51.605	12.897	38.708	-75.0082	75.0082
control_fish01	_	_6	57.777	15.835	41.942	-72.5929	72.5929
control_fish02	_1	_2	57.263	18.633	38.63	-67.4607	67.4607
control_fish03	_2	_7	58.923	22.609	36.314	-61.6296	61.6296
control_fish04	_3	_	54.024	24.464	29.56	-54.7164	54.7164
control_fish05	_4	_5	68.392	26.583	41.809	-61.1314	61.1314
control_fish06	_5	_1	65.216	30.302	34.914	-53.5359	53.5359
control_fish07	_6	_3	38.413	9.317	29.096	-75.7452	75.7452
control_fish08	_7	_9	57.263	20.721	36.542	-63.8143	63.8143
control_fish09	_8	_4	52.794	25.948	26.846	-50.8505	50.8505
control_fish10	_9	_8	65.878	6.211	59.667	-90.572	90.572
control_fish01	_	_6	69.014	23.649	45.365	-65.733	65.733
control_fish02	_1	_2	46.296	13.803	32.493	-70.1853	70.1853
control_fish03	_2	_7	38.673	14.939	23.734	-61.371	61.371
control_fish04	_3	_	41.178	12.346	28.832	-70.018	70.018
control_fish05	_4	_5	30.398	8.561	21.837	-71.837	71.837
control_fish06	_5	_1	68.53	31.475	37.055	-54.0712	54.0712
control_fish07	_6	_3	32.223	12.346	19.877	-61.6858	61.6858
control_fish08	_7	_9	61.806	18.519	43.287	-70.0369	70.0369
control_fish09	_8	_4	31.018	11.475	19.543	-63.0054	63.0054
control_fish10	_9	_8	72.251	34.513	37.738	-52.2318	52.2318

## Sheet: Fig 3 suppl 1A
mean blgap intensity
bglap	fin01	mean	fin02	mean	fin03	mean	fin04	mean	fin05	mean	fin06	mean	fin07	mean	fin08	mean	fin09	mean	fin10	mean	fin11	mean	fin12	mean	fin13	mean	fin14	mean	fin15	mean
	seg 0	26.994	seg 0	5.74467	seg 0	20.128	seg 0	5.3085	seg 0	4.2725	seg 0	8.2505	seg 0	5.16533	seg 0	10.7445	seg 0	6.676	seg 0		seg 0	9.0885	seg 0	8.152	seg 0	4.6075	seg 0	5.095	seg 0	7.8655
	seg -1	29.406	seg -1	9.38533	seg -1	32.399	seg -1	9.5136	seg -1	16.3953	seg -1	20.2133	seg -1	9.8535	seg -1	14.8948	seg -1	8.8635	seg -1		seg -1	10.1275	seg -1	13.5435	seg -1	15.8308	seg -1	8.8346	seg -1	11.857
	seg -2	57.7088	seg -2	16.3403	seg -2	47.0603	seg -2	38.903	seg -2	31.617	seg -2	23.9757	seg -2	18.0435	seg -2	35.473	seg -2	17.1725	seg -2		seg -2	21.0798	seg -2	17.877	seg -2	28.0853	seg -2	21.8985	seg -2	19.0917
% segM1 of segM2
bglap	fin01	mean	fin02	mean	fin03	mean	fin04	mean	fin05	mean	fin06	mean	fin07	mean	fin08	mean	fin09	mean	fin10	mean	fin11	mean	fin12	mean	fin13	mean	fin14	mean	fin15	mean
	seg -1	46.7763	seg -1	35.1564	seg -1	42.7706	seg -1	13.6455	seg -1	13.5133	seg -1	34.412	seg -1	28.6271	seg -1	30.2892	seg -1	38.8761	seg -1	#DIV/0!	seg -1	43.1148	seg -1	45.6005	seg -1	16.4054	seg -1	23.2664	seg -1	41.1986
	seg -2	50.9559	seg -2	57.4366	seg -2	68.8457	seg -2	24.4547	seg -2	51.8558	seg -2	84.3074	seg -2	54.6097	seg -2	41.989	seg -2	51.6145	seg -2	#DIV/0!	seg -2	48.0437	seg -2	75.7594	seg -2	56.3666	seg -2	40.3434	seg -2	62.1056
	seg0	100	seg0	100	seg0	100	seg0	100	seg0	100	seg0	100	seg0	100	seg0	100	seg0	100	seg0	#DIV/0!	seg0	100	seg0	100	seg0	100	seg0	100	seg0	100

## Sheet: Fig 3 suppl 1B
count Runx2+ cells
series	Runx2+
control_001	50
control_002	33
control_003	50
control_004	42
control_005	49
control_006	44
control_007	46
control_008	55
control_009	47
control_010	47
cytD_001	53
cytD_002	47
cytD_003	44
cytD_004	32
cytD_005	50
cytD_006	50
cytD_007	35
cytD_008	31
cytD_009	62
cytD_010	59

## Sheet: Fig 3 suppl 1C
regenerative length
absolute length (µm)				box cox transformation
control cytD	cytD	control bleb	blebbistatin	control cyt bx	cytD bx	control bleb bx	blebb bx
349	257.08	349	87.205	4345.91	2747.3	4345.91	542.235
256.32	39.445	256.32	62.8	2735.12	164.49	2735.12	331.112
249.185	313.265	249.185	185.915	2621.69	3695.71	2621.69	1689.31
264.645	86.54	264.645	160.43	2869.48	536.036	2869.48	1354.01
266.855	167.545	266.855	149.355	2905.51	1445.13	2905.51	1216.19
288.585	150.81	288.585	157.435	3267.61	1234.01	3267.61	1316.26
285.9	170.305	285.9	199.025	3222.11	1481	3222.11	1871.18
194.775	248.77	194.775	162.435	1811.54	2615.14	1811.54	1379.49
263.6	35.345	263.6	125.13	2852.5	139.421	2852.5	932.482
165.26	214.52	165.26	187.485	1415.65	2093.98	1415.65	1710.76
277.365	228.51	269.195	161.838	3078.88	2302.19	2943.82	1371.89
317.695	185.75		255.798	3774.4	1687.06	-0.666667	2726.77
241.855	188.16	450.674	124.834	2506.84	1720.01	6377.6	929.173
273.025	220.885	417.93	372.153	3006.88	2187.89	5695.26	4785.54
246.995	175.02	303.683	190.722	2587.19	1542.95	3527.42	1755.27
290.58	128.895	351.743	369.321	3301.56	974.913	4397.25	4731.01
319.665	169.89	334.818	144.348	3809.56	1475.59	4083.67	1155.51
270.38	291.805	332.85	363.402	2963.28	3322.47	4047.72	4617.71
323.235	72.735	384.726	341.23	3873.57	412.879	5030.12	4201.56
241.16	238.31	390.225	284.996	2496.04	2451.91	5138.37	3206.83

[truncated: 1 more sheets: effect size]
