# Supplementary material for: Zebrafish fin regeneration involves generic and regeneration-specific osteoblast injury responses
Source: eLife. 2022 Jun 24;11:e77614. doi: 10.7554/eLife.77614 (PMC9259016; doi:10.7554/eLife.77614)
Supplement: Figure 4—source data 1. [file elife-77614-fig4-data1.xlsx]

## Sheet: Fig 4A
width / length
2102 M2 nonrecomb	2102 M1 nonrecomb	2102 M2 recomb	2102 M1 recomb	2257 M2 nonrecomb	2257 M1 nonrecomb	2257 M2 recomb	2257 M1 recomb	2198 M2 nonrecomb	2198 M1 nonrecomb	2198 M2 recomb	2198 M1 recomb
0.344	0.264338	0.436	0.305185	0.377024	0.262006	0.377092	0.259386	0.463091	0.363889	0.404021	0.446252		2102 osx:CreERT2; hs:nlsG
0.293	0.377778	0.444	0.306783	0.292694	0.20692	0.320855	0.234414	0.357816	0.421917	0.378271	0.363097		2257 osx:CreERT2; hs:CAIKK BFP
0.467	0.327403	0.347	0.214072	0.393682	0.348212	0.426182	0.290258	0.338473	0.266048	0.301201	0.361622		2198 osx:CreERT2; hs:nYPet IkBSR
0.356	0.205484	0.28	0.409411	0.296887	0.277665	0.533291	0.300796	0.368483	0.28852	0.342135	0.385221
0.403	0.235316	0.354	0.289736	0.485084	0.2839	0.554879	0.312774	0.34958	0.281325	0.395465	0.312143
0.331	0.355733	0.323	0.224865	0.454124	0.192193	0.425414	0.181445	0.288074	0.333333	0.359462	0.267646
0.371	0.25565	0.317	0.283791	0.363365	0.263764	0.234541	0.243054	0.307464	0.185733		0.270479
0.371	0.203488	0.388	0.150106	0.286394	0.236006	0.243334	0.182486		0.236861	0.38145	0.253708
	0.208912	0.375	0.407533	0.4	0.13409	0.289455	0.227872	0.278649	0.21778	0.490146	0.236089
	0.386416	0.366	0.332182	0.247333	0.201493	0.370052	0.273593	0.307638	0.334356	0.386708
	0.216888	0.56	0.4	0.453908	0.409177	0.60668	0.288368	0.429471		0.535927	0.1818
			0.210178		0.213409	0.356221	0.315988	0.420465	0.4193	0.389942	0.25198
0.381		0.406	0.214767	0.478923			0.273753	0.261168	0.40617	0.478566	0.48179
0.234		0.41	0.31694	0.246794	0.16687	0.391211	0.250326	0.376584	0.38519	0.387081	0.34954
0.533		0.349	0.285737	0.230652	0.35494	0.265944	0.313725	0.45933	0.30003		0.38475
0.295		0.317	0.219623	0.369231	0.29274	0.350539	0.237462		0.37202	0.316818	0.52617
0.415		0.335	0.254283	0.425324	0.34222	0.447233	0.195211	0.500725	0.2506	0.348531	0.36058
0.432		0.256		0.364206	0.28243	0.349023	0.226882	0.355495	0.25021
0.392	0.212999	0.195	0.411487	0.270937	0.22539	0.433154	0.167428		0.25225	0.40514	0.48649
	0.363389	0.392	0.240851	0.262288	0.26893	0.421382	0.210684	0.49387	0.32212	0.338209	0.40455
	0.196265	0.397	0.192837		0.33769		0.162911	0.354172			0.34355
	0.234663	0.456	0.380876	0.322131	0.27705	0.363766	0.204307		0.250216	0.36969
	0.304057	0.254	0.251529	0.37952	0.21278	0.43391	0.245858	0.382321	0.272833	0.314328	0.366703
	0.312101	0.469	0.230294	0.442653	0.23831	0.504623	0.334939	0.227974	0.26945	0.427987	0.305833
	0.339359	0.396	0.38535	0.428577	0.27474	0.558346	0.344226	0.32016	0.257633	0.581237	0.320383
	0.258092		0.368793	0.382509		0.405376	0.207458	0.36357	0.298478
0.267	0.342259	0.375	0.159405	0.429505	0.195682	0.2669			0.204978	0.406611	0.181877
0.428	0.372668	0.393	0.498902	0.348605	0.394462		0.24395	0.237044	0.223515	0.289715	0.272858
0.385	0.228058	0.306	0.269835		0.138925	0.27256	0.17042	0.495378	0.256323
0.45	0.286495	0.37	0.378396	0.310381	0.36835	0.428688	0.24464		0.352801	0.535736	0.333
0.493	0.33662	0.451	0.346643	0.435506	0.188388	0.430618	0.33664	0.369511		0.37887	0.464
0.456		0.396		0.415693	0.340126	0.344136	0.31416	0.512518	0.275663		0.478
0.392	0.347966	0.342	0.302163	0.496995	0.284436	0.4031	0.37537		0.247876	0.430769
0.385	0.191032	0.373	0.339894	0.370142	0.326881	0.424516	0.25731	0.415199	0.272673	0.489247	0.179
0.45	0.265227	0.265	0.256126	0.249088	0.412663		0.31343	0.381752	0.342706	0.385557	0.238
0.49	0.258535	0.412	0.255006		0.241885	0.511628	0.25885	0.506412	0.25651
	0.311681	0.339	0.300242	0.365929		0.443726	0.35933		0.311321	0.386885	0.282
	0.22989	0.49	0.321485	0.358621	0.420815	0.399852	0.36049	0.477687		0.568867
	0.355598	0.591	0.362664	0.218639	0.278387	0.347103		0.402209	0.228896	0.552148	0.313
	0.204074		0.238662	0.341567	0.39039	0.317058	0.33358	0.345563	0.292694		0.421
0.416	0.19453	0.5	0.244629	0.384738	0.239784	0.233265	0.2537		0.288455	0.249473	0.159
0.511	0.321171	0.403	0.382206	0.390276	0.39093	0.267085	0.33841	0.318128	0.294923	0.225205	0.24
0.334	0.155061	0.333	0.228035	0.325679	0.281625	0.434899	0.27018	0.334804
0.271	0.1666	0.381	0.258712	0.332577	0.234785	0.315672	0.22576		0.278	0.268674	0.279
0.376	0.266852	0.344	0.256184	0.259941	0.23981	0.422334	0.14227	0.436833	0.398		0.386
0.424	0.274843	0.254	0.337446	0.437018	0.155844		0.40891		0.388	0.601794	0.226
0.33	0.37395	0.394944	0.339612			0.259078	0.32688	0.391685		0.402947
				0.311579	0.389705	0.312248	0.41266	0.424044	0.349	0.312048	0.188
0.324	0.274943	0.385	0.267143	0.343583	0.355947	0.412083	0.24188	0.372881	0.268		0.195
0.268	0.262471	0.283	0.24015	0.530329	0.31376	0.326868			0.319	0.409009	0.417
0.368	0.226186	0.345	0.240484	0.445005	0.31143	0.373441	0.318648	0.393916	0.332	0.489534	0.364
0.332	0.355665	0.362	0.249943	0.461718	0.325165	0.384045	0.309679	0.569207
0.352	0.164997	0.305	0.314499	0.327606	0.371144	0.372468	0.254993		0.229	0.25284	0.191
0.54	0.199184	0.387	0.321556	0.413319	0.321906	0.384375	0.221053	0.349796	0.182	0.517184	0.241
	0.222896	0.391	0.312813		0.457583	0.497178	0.180804	0.411568		0.50086
	0.350184	0.239	0.421809	0.485068	0.398718		0.248978	0.301246	0.279282	0.370653	0.246
	0.319756	0.328	0.361182	0.295233		0.341715	0.351134	0.363472	0.231472	0.386472	0.311
	0.374902		0.274655	0.299853	0.295	0.322189	0.236131		0.358208		0.246
0.404	0.384567	0.335	0.261522	0.350181	0.326	0.346105	0.194637	0.351911	0.290348	0.328799
0.473	0.328322	0.415		0.324588	0.339	0.384233	0.209877	0.37022	0.275402	0.518941	0.296
0.366		0.499		0.369917	0.348	0.313029	0.258038	0.530581		0.566597	0.13
0.365	0.376286	0.289	0.324404	0.325649	0.303	0.410022	0.296386		0.358
0.492	0.259733	0.323	0.242162		0.287			0.438727	0.311	0.345765	0.251
0.472	0.360493	0.32	0.20381				0.3839	0.338772	0.223	0.315086	0.327
	0.398708	0.37	0.366343		0.335		0.231456	0.395995		0.385641
	0.321234	0.32	0.216064		0.28		0.377294		0.263		0.275
	0.362123	0.371	0.410459				0.093527	0.35022	0.136	0.468826	0.314
	0.330442	0.326	0.342868				0.384745	0.422227	0.377	0.34828	0.314
			0.185654				0.396228	0.370959	0.208	0.48657
0.252		0.359	0.238458				0.506722				0.234
0.378		0.381	0.203189				0.203068	0.385546	0.187	0.437909	0.297
0.369		0.275	0.290479					0.43096	0.25	0.406053	0.228
0.277		0.197					0.295
0.511	0.246532	0.449011	0.316938				0.411		0.319		0.271
0.317	0.301358	0.299	0.265247				0.257		0.249		0.236
0.321	0.240701	0.448	0.315181				0.288		0.287
0.422	0.313265	0.503	0.214068				0.329
0.396	0.34568	0.348	0.199629						0.166
	0.207582		0.322675				0.396		0.31
0.484	0.306702	0.527	0.355699				0.265
0.377	0.284695	0.436	0.277486						0.246
0.401	0.346863	0.418	0.235288						0.214
0.48	0.325522	0.418	0.231459
0.553		0.243	0.30681						0.337
0.476		0.403	0.233694						0.339
0.383		0.373	0.393355						0.216
			0.362812
0.295		0.384							0.273
0.314	0.184966	0.377	0.293092						0.236
0.34	0.198139	0.384	0.190286						0.332
0.329	0.242636	0.216	0.245844
0.372	0.214501	0.497	0.282972						0.248
0.224	0.347608	0.356	0.263355						0.332
0.419	0.275681	0.463	0.306581
	0.321087	0.383	0.160953
	0.318102	0.302	0.191558
	0.31815	0.329	0.298059
	0.321429	0.589	0.308309
	0.23206		0.202547
0.476		0.458	0.386918
0.401		0.469	0.156574
0.473		0.26	0.220365
0.286		0.535	0.253594
0.36		0.391
0.42	0.30045	0.289	0.22
0.454	0.275482	0.303	0.35508
0.384	0.247178	0.453	0.22085
0.328	0.287649		0.274788
0.334	0.185049		0.225148
0.322	0.291271		0.18541
0.429	0.241822		0.200071
0.547	0.307593
	0.212625
	0.299817
	0.225373		0.149677
	0.270722		0.215802
	0.269494		0.310278
	0.129951		0.374823
	0.327013		0.207582
	0.326752		0.275469
	0.2482		0.243582
			0.321823
			0.317061
			0.379943
	0.262879		0.246257
	0.25708		0.255632
	0.343387		0.318706
	0.403497		0.352845
	0.338806		0.224524
	0.272441		0.272041
	0.329426		0.265105
	0.242653		0.203891
	0.365677		0.471025
			0.248936

## Sheet: Fig 4B
mean bglap intensity
control	fin01	mean	fin02	mean	fin03	mean	fin04	mean	fin05	mean	fin06	mean	fin07	mean	fin08	mean	fin09	mean	fin10	mean	fin11	mean	fin12	mean
	seg -1	36.8555	seg -1	70.1927	seg -1	41.4392	seg -1	52.0208	seg -1	37.664	seg -1	30.8316	seg -1	78.1392	seg -1	50.9364	seg -1	38.6252	seg -1	53.5457	seg -1	35.6457	seg -1	52.2618
	seg -2	70.7996	seg -2	98.7436	seg -2	65.0006	seg -2	75.7568	seg -2	63.968	seg -2	42.104	seg -2	113.127	seg -2	92.4189	seg -2	70.8183	seg -2	83.7098	seg -2	44.8243	seg -2	67.2706
RA	fin01	mean	fin02	mean	fin03	mean	fin04	mean	fin05	mean	fin06	mean	fin07	mean	fin08	mean	fin09	mean	fin10	mean	fin11	mean	fin12	mean
	seg -1	34.1925	seg -1	16.7336	seg -1	17.3637	seg -1	118.446	seg -1	69.3243	seg -1	87.6958	seg -1	51.1908	seg -1	62.8535	seg -1	62.8535	seg -1	45.82	seg -1	74.696	seg -1	36.8482
	seg -2	37.6648	seg -2	18.0606	seg -2	23.3358	seg -2	124.461	seg -2	70.739	seg -2	99.079	seg -2	68.9017	seg -2	73.7428	seg -2	73.7428	seg -2	60.767	seg -2	84.9926	seg -2	46.7802
% segM1 of segM2
control	fin01	mean	fin02	mean	fin03	mean	fin04	mean	fin05	mean	fin06	mean	fin07	mean	fin08	mean	fin09	mean	fin10	mean	fin11	mean	fin12	mean
	seg -1	52.0561	seg -1	71.0858	seg -1	63.752	seg -1	68.6682	seg -1	58.8794	seg -1	73.2272	seg -1	69.072	seg -1	55.1148	seg -1	54.5412	seg -1	63.9658	seg -1	79.523	seg -1	77.689
	seg -2	100	seg -2	100	seg -2	100	seg -2	100	seg -2	100	seg -2	100	seg -2	100	seg -2	100	seg -2	100	seg -2	100	seg -2	100	seg -2	100
RA	fin01	mean	fin02	mean	fin03	mean	fin04	mean	fin05	mean	fin06	mean	fin07	mean	fin08	mean	fin09	mean	fin10	mean	fin11	mean	fin12	mean
	seg -1	90.781	seg -1	92.6525	seg -1	74.4077	seg -1	95.1673	seg -1	98.0001	seg -1	88.511	seg -1	74.2955	seg -1	85.2335	seg -1	85.2335	seg -1	75.4028	seg -1	87.8853	seg -1	78.7688
	seg -2	100	seg -2	100	seg -2	100	seg -2	100	seg -2	100	seg -2	100	seg -2	100	seg -2	100	seg -2	100	seg -2	100	seg -2	100	seg -2	100

## Sheet: Fig 4C
width / length
control seg-3	RA seg-3	control seg-2	RA seg-2	control seg-1	RA seg-1
0.35624	0.384458	0.311405	0.201251	0.167604	0.260076
0.237667	0.253112	0.10984	0.452291	0.228986	0.325985
0.300484	0.354584	0.413039	0.295767	0.186031	0.199046
0.343505	0.357838	0.411047	0.288512	0.170514	0.353646
0.398961	0.177926	0.376242	0.198609	0.20838	0.179799
0.308929	0.200909	0.375739	0.259249	0.123497	0.150693
0.303841	0.391776	0.310226	0.153037	0.235403	0.376832
0.171225	0.202942	0.266054	0.226904	0.214671	0.18374
0.26532	0.242828	0.447395	0.255831	0.141966	0.152097
0.33719	0.408954	0.326465	0.147995	0.205468	0.232442
0.297635	0.302029	0.344767	0.478721	0.206781	0.127567
0.329678	0.210719	0.445494	0.305056	0.191669	0.183545
0.445656	0.303095	0.327928	0.317962	0.105404	0.184121
0.570139	0.276791	0.225306	0.279417	0.316151	0.107879
0.311467	0.289855	0.414502	0.486527	0.17238	0.109756
0.361783	0.356391	0.381705	0.326941	0.183537	0.12206
0.311589	0.54764	0.299868	0.196379	0.238761	0.121095
0.394984	0.444133	0.353782	0.334897	0.235866	0.134359
0.385177	0.230097	0.350166	0.382515	0.180741	0.174042
0.358094	0.551195	0.322584	0.57819	0.203955	0.172735
0.389147	0.447177	0.331635	0.3911	0.259329	0.164044
0.298235	0.39148	0.276071	0.267402	0.200999	0.167784
0.393884	0.216947	0.161487	0.273078	0.195739	0.180061
0.381303	0.270108	0.376291	0.284861	0.167649	0.244459
0.33876	0.31724	0.502394	0.403252	0.169752	0.17524
0.38447	0.47587	0.442729	0.264187	0.228784	0.117325
0.346294	0.454905	0.355987	0.297431	0.153393	0.189767
0.35721	0.259726	0.272556	0.34703	0.154329	0.251468
0.320629	0.37257	0.487755	0.323291	0.13901	0.249947
0.214818	0.259367	0.40677	0.31686	0.17738	0.201968
0.248957	0.205338	0.229723	0.490465	0.230129	0.181879
0.242726	0.280327	0.156081	0.437335	0.175504	0.195761
0.25331	0.44884	0.222351	0.323061	0.255448	0.198617
0.451081	0.412052	0.486316	0.294822	0.227604	0.137192
0.393902	0.278583	0.334548	0.344711	0.216531	0.258068
0.240427	0.540683	0.442729	0.379017	0.23207	0.240973
0.254109	0.410703	0.292819	0.34788	0.212713	0.22596
0.255303	0.388839	0.447895	0.490959	0.16358	0.303751
0.411357	0.167906	0.347534	0.369565	0.213451	0.221057
0.301587	0.319381	0.313586	0.33363	0.283414	0.112321
0.358375	0.245138	0.390193	0.324879	0.228848	0.22549
0.302426	0.451819	0.33974	0.423297	0.225571	0.25485
0.44568	0.264474	0.431897	0.345685	0.181464	0.219594
0.253481	0.467477	0.303564	0.276088	0.218933	0.118166
0.421682	0.370871	0.260837	0.324005	0.191495	0.22235
0.507857	0.260743	0.381098	0.429073	0.213848	0.136337
0.360133	0.179961	0.321264	0.364952	0.170219	0.161445
0.422363	0.37098	0.386653	0.344921	0.268123	0.214021
0.391402	0.387685	0.349757	0.289181	0.133522	0.268553
0.348885	0.493249	0.362826	0.326571	0.191483	0.148186
0.1875	0.311456	0.281293	0.275218	0.28003	0.233799
0.227055	0.447168	0.391109	0.304805	0.247215	0.117354
0.351785	0.243809	0.495983	0.316277	0.220477	0.250937
0.328405	0.263047	0.359669	0.244396	0.269778	0.26448
0.367324	0.470808	0.330393	0.346638	0.196834	0.178442
0.300405	0.445908	0.439689	0.281681	0.197603	0.171123
0.577209	0.410652	0.279087	0.270572	0.232695	0.148168
0.363269	0.408651	0.310999	0.275515	0.229987	0.227499
0.357551	0.214491	0.412491	0.321363	0.212743	0.113771
0.335672	0.472485	0.337391	0.422334	0.222182	0.182624
0.274648	0.393621	0.280813	0.277233	0.2	0.21494
0.30846	0.458975	0.347398	0.394335	0.161964	0.208558
0.350806	0.384041	0.30543	0.352174	0.174514	0.13296
0.472081	0.347187	0.313	0.363815	0.232612	0.15005
0.386803	0.428163	0.453268	0.420313	0.205603	0.265476
0.317406	0.355216	0.221032	0.28016	0.166097	0.129368
0.407062	0.358958	0.237916	0.299517	0.186019	0.284289
0.47559	0.313888	0.239613	0.267884	0.158074	0.256749
0.272166	0.234823	0.310907	0.331091	0.273032	0.167472
0.394854	0.350513	0.280606	0.307273	0.214891	0.151087
0.454686	0.226901	0.384857	0.428048	0.264059	0.273284
0.411923	0.285219	0.551534	0.337744	0.180399	0.284037
0.301307	0.431867	0.262738	0.289081	0.171193	0.270246
0.313439	0.409418	0.488767	0.398316	0.196294	0.19541
0.279211	0.414707	0.480916	0.394293	0.17596	0.207735
0.334005	0.271761	0.420441	0.324196	0.126423	0.205638
0.312319	0.3793	0.497105	0.399355	0.190607	0.156341
0.426825	0.36078	0.543442	0.256364	0.114519	0.157451
0.408249	0.296547	0.312077	0.352729	0.167005	0.182587
0.329868	0.456217	0.316557	0.31534	0.13054	0.174958
0.334705	0.437101	0.333333	0.312558	0.125291	0.164145
0.360871	0.30807	0.314859	0.285053	0.195821	0.159879

## Sheet: Fig 4D
angular deviation
control seg-3	RA seg-3	control seg-2	RA seg-2	control seg-1	RA seg-1
16	16.09	20.01	12.66	7.09	15.31
23.11	11.75	27.88	19.91	4.67	11.53
20.34	13.17	23.1	15.13	11.16	20.31
25.02	15.09	29.54	20.08	17.48	9.6
14	25.64	13.47	22.29	19.68	17.47
17.91	29.82	19.45	13.39	11.52	3.39
16.7	19.45	18.25	19.94	3.37	19.74
33.02	17.47	18.32	33.55	5.27	5.08
13.51	23.26	14.65	17.84	13.2	14.3
23.32	24.53	21.08	24.3	3.33	13.19
20.51	20.26	11.16	21.22	2.61	15.37
14.58	22.11	26.57	23.13	3.52	11.68
12.53	17.51	22.47	12.48	11.34	12.82
19.97	19.84	13.76	11.88	13.17	14.39
11.94	18.75	14.69	32.13	14.32	11.72
17.43	25.15	9.3	17.43	17.61	16.7
13.45	12.92	19.57	13.32	17.15	10.3
17.12	16.57	18.43	22.32	7.13	17.14
26.27	21.24	15.82	12.53	10.12	14.32
39.12	29.57	21.04	10.27	7.15	9.93
30.41	21.16	8.51	20.4	18.8	11.4
12.39	16.56	25.55	21.99	18.07	11.61
30.9	12.96	17.45	18.03	10.08	13.04
14.68	20.83	31.65	37.01	17.73	7.46
24.24	29.5	16.13	23.82	13.22	14.44
22.75	27.84	24.56	15.98	12.7	8.86
35.91	28.06	22.08	17.1	10.91	16.24
22.69	28.44	24.56	19.85	13.12	11.84
11.77	16.64	20.4	14.42	15.95	11.03
8.14	25.23	20.96	35.02	9.64	11.39
10.2	22.83	25.77	29.61	8.13	16.19
20.37	28.44	28.26	9.47	14.84	11.18
9.77	16.43	28.95	19.63	16.17	4.29
18.79	24.35	15.49	11.39	18.03	5.08
29.15	25.85	17.6	13.87	12.31	7.39
23.35	16.95	13.56	11.48	12.83	6.67
17.21	24.49	28.46	13.67	16.24	9.45
21.69	14.04	12.7	25.08	9.54	16.11
15.28	9.64	16.37	21.87	10.67	20.09
17.11	22.28	17.43	13.24	12.22	13.83
16.1	15.95	20.62	17.13	11.53	11.31
19.17	23.81	22.99	18.64	3.37	10.2
17.67	17.97	23.71	14.58	5.78	10.95
12.56	16.01	17.85	20.38	7.26	7.46
14.58	10.89	9.46	36.97	7.28	5.26
16.93	16.29	15.95	11.55	8.26	10.13
11.85	8.62	19.74	11.41	7.13	15.69
13.84	17.11	23.5	25.02	3.81	17.09
11.08	12.46	14.23	8.43	4.07	7.61
17.75	11.34	16.57	8.88	9.86	3.63
12.95	10.14	26.99	14.74	8.98	6.14
13.78	14.04	15.8	8.29	6.26	5.19
11.87	18.33	18.43	13.29	8.6	4.98
12.13	21.02	14.23	9.49	3.27	10.39
11	18	15.32	29	17	7
29.23	20.33	21.98	15.95	11.82	6.01
16.93	19.4	16.62	19.09	11.95	4.93
7.64	12.67	8.51	19.83	4.46	5.96
10.65	16.09	10.2	12.12	12.19	7.13
16.25	17.15	10.49	27.76	5.71	6.48
11.16	20.33	14.67	21.46	9	4.74
14.51	22.56	9.23	18.14	9.85	7.94
11.12	5.34	24.1	13.23	13.11	9.22
12.71	9.51	15.43	23.99	9.16	5.32
18.08	14.18	20.86	30.25	4.76	14.49
11.4	12.98	29.66	16.6	12.4	14.57
12.45	32.62	10.92	13.49	9.58	9.27
16.96	10.25	23.67	24.61	2.76	6.95
10.92	17.99	12.72	15.59	8.03	7.13
15.95	12.26	23.19	14.35	13.22	7.59
23.37	18.76	16.7	17.4	12.13	18.87
19.4	14.78	13.96	10.15	5.53	7.73
16.34	25.4	20.39	13.42	5.26	5.69
14.16	13.93	20.75	23.98	10.51	2.85
9.46	8.75	15.49	34.05	11.92	4.3
12.65	17.24	20.84	16.38	14.78	6.38
15.52	20.56	8.74	11.52	11.6	7.26
15.33	12.91	18.87	22.1	16.5	12.87
17.94	7.49	17.53	21.1	5.64	12.99
17.28	15.45	17.72	12.56	5.54	6.79
20.49	26.61	16.99	11.38	10.54	14.11
11.69	16.6	20.25	11.09	1.5	6.7
10.43	10.82	12.41	5.71	7.79	3.47
16.39	19.77	17.31	19.21	13.32	8.59
11.81	17.49	16.41	18.24	7.56	3.51
27.44	18.24	21.32	22.85	8.77	6.8
23.39	9.27	13.69	16.23	4.92	8.75
18.43	13.97	17.13	21.06	5.04	9.9
14.54	17.69	10.97	17.09	10.49	8.07

## Sheet: Fig 4E
MC_027									MC_028										MC_030
	0dpa	1dpa	distance 1st joint - gfp 2nd segment (µm) 0dpa	distance 1st joint - gfp 2nd segment (µm) 1dpa	D distance 1st joint	% distance 1st joint change	migration (%)			0dpa	1dpa	3 dpa	distance 1st joint - gfp 2nd segment (µm) 0dpa	distance 1st joint - gfp 2nd segment (µm) 1dpa	D distance 1st joint	% distance 1st joint change	migration (%)			0dpa	1dpa	distance 1st joint - gfp segment -1 (µm) 0dpa	distance 1st joint - gfp segment -1 (µm) 1dpa	D distance 1st joint	% distance 1st joint change	migration (%)
retinoic acidD_fish01	_	_3	48.28	18.31	29.97	-62.0754	62.0754		RA_fish01	_	_6	2_2	67.02	33.65	33.37	-49.7911	49.7911		RA_fish01	_	_5	40.7	17.59	23.11	-56.7813	56.7813
retinoic acidD_fish02	_1	_9	16.52	3.69	12.83	-77.6634	77.6634		RA_fish02	_1	_3	4_4	70.14	32.21	37.93	-54.0776	54.0776		RA_fish02	_1	n.i.	38.89
retinoic acidD_fish03	_2	_7	51.22	23.01	28.21	-55.0761	55.0761		RA_fish03	_2	_8	4_5	74.76	28.84	45.92	-61.4232	61.4232		RA_fish03	_2	_7	42.14	16.14	26	-61.6991	61.6991
retinoic acidD_fish04	_3	_1	33.88	1.23	32.65	-96.3695	96.3695		RA_fish04	_3	_5	4_1	57.93	15.12	42.81	-73.8995	73.8995		RA_fish04	_3	_8	44.53	27.23	17.3	-38.8502	38.8502
retinoic acidD_fish05	_4	_6	40.38	19.86	20.52	-50.8172	50.8172		RA_fish05	_4	_9	4_2	84.72	7.44	77.28	-91.2181	91.2181		RA_fish05	_4	_1	55.63	26.22	29.41	-52.8672	52.8672
retinoic acidD_fish06	_5	_8	29.27	2.46	26.81	-91.5955	91.5955		RA_fish06	_5	_	4_3	52.56	22.23	30.33	-57.7055	57.7055		RA_fish06	_5	_3	51.29	5.1	46.19	-90.0565	90.0565
retinoic acidD_fish07	_6	_5	35.46	8.97	26.49	-74.7039	74.7039		RA_fish07	_6	_4	2_	62.72	1.52	61.2	-97.5765	97.5765		RA_fish07	_6	_2	53.25	19.84	33.41	-62.7418	62.7418
retinoic acidD_fish08	_7	_4	43.26	22.61	20.65	-47.7346	47.7346		RA_fish08	_7	_1	2_1	50.33	11.85	38.48	-76.4554	76.4554		RA_fish08	_7	_	49	17.37	31.63	-64.551	64.551
retinoic acidD_fish09	_8	_2	44.41	16.01	28.4	-63.9496	63.9496		RA_fish09	_8	_2	4_6	65.18	30.31	34.87	-53.498	53.498		RA_fish09	_8	_6	43.14	20.75	22.39	-51.9008	51.9008
retinoic acidD_fish10	_9	_	36.43	2.46	33.97	-93.2473	93.2473		RA_fish10	_9	_7	4_	64.67	14.73	49.94	-77.2228	77.2228		RA_fish10	_9	_4	49.87	17.24	32.63	-65.4301	65.4301
retinoic acidD_fish01	_	_3	45.29	5.08	40.21	-88.7834	88.7834		RA_fish01	_	_6	2_2	72.87	19.32	53.55	-73.487	73.487		RA_fish01	_	_5	39.74	25.03	14.71	-37.0156	37.0156
retinoic acidD_fish02	_1	_9	19.9	4.93	14.97	-75.2261	75.2261		RA_fish02	_1	_3	4_4	64.04	28.11	35.93	-56.1056	56.1056		RA_fish02	_1	n.i.	29.58
retinoic acidD_fish03	_2	_7	42.85	22.33	20.52	-47.888	47.888		RA_fish03	_2	_8	4_5	65.18	17.61	47.57	-72.9825	72.9825		RA_fish03	_2	_7	30.4	8.3	22.1	-72.6974	72.6974
retinoic acidD_fish04	_3	_1	25.45	3.69	21.76	-85.501	85.501		RA_fish04	_3	_5	4_1	64.67	8.36	56.31	-87.0728	87.0728		RA_fish04	_3	_8	40.5	25.91	14.59	-36.0247	36.0247
retinoic acidD_fish05	_4	_6	37.78	20.3	17.48	-46.2679	46.2679		RA_fish05	_4	_9	4_2	61.9	27.09	34.81	-56.2359	56.2359		RA_fish05	_4	_1	32.09	9.93	22.16	-69.0558	69.0558
retinoic acidD_fish06	_5	_8	33.3	5.08	28.22	-84.7447	84.7447		RA_fish06	_5	_	4_3	62.85	28.59	34.26	-54.5107	54.5107		RA_fish06	_5	_3	33.63	20.15	13.48	-40.0833	40.0833
retinoic acidD_fish07	_6	_5	39.14	6.16	32.98	-84.2616	84.2616		RA_fish07	_6	_4	2_	56.24	21.47	34.77	-61.8243	61.8243		RA_fish07	_6	_2	58.2	14.9	43.3	-74.3986	74.3986
retinoic acidD_fish08	_7	_4	41.76	15.98	25.78	-61.7337	61.7337		RA_fish08	_7	_1	2_1	55.24	13.12	42.12	-76.2491	76.2491		RA_fish08	_7	_	41.07	12.62	28.45	-69.272	69.272
retinoic acidD_fish09	_8	_2	44.01	4.93	39.08	-88.798	88.798		RA_fish09	_8	_2	4_6	79.9	33.12	46.78	-58.5482	58.5482		RA_fish09	_8	_6	32.09	16.02	16.07	-50.0779	50.0779
retinoic acidD_fish10	_9	_	39.37	18.64	20.73	-52.6543	52.6543		RA_fish10	_9	_7	4_	63.66	30.36	33.3	-52.3091	52.3091		RA_fish10	_9	_4	35.58	6.19	29.39	-82.6026	82.6026
control_fish01	_	_4	24.54	1.85	22.69	-92.4613	92.4613		control_fish01	_	_6	_3	77.62	36.22	41.4	-53.3368	53.3368		control_fish01	_	_	41.24	6.04	35.2	-85.354	85.354
control_fish02	_1	_1	35.9	9.93	25.97	-72.3398	72.3398		control_fish02	_1	_5	_1	63.24	19.63	43.61	-68.9595	68.9595		control_fish02	_1	_8	59.17	25.45	33.72	-56.9883	56.9883
control_fish03	_2	_7	43.5	15.89	27.61	-63.4713	63.4713		control_fish03	_2	dead		61.36						control_fish03	_2	_3	42.81	14.26	28.55	-66.69	66.69
control_fish04	_3	_6	30.47	11.12	19.35	-63.5051	63.5051		control_fish04	_3	dead		47.33						control_fish04	_3	_1	63.42	13.61	49.81	-78.5399	78.5399
control_fish05	_4	_2	20.39	3.89	16.5	-80.922	80.922		control_fish05	_4	_	_	59.9	9.94	49.96	-83.4057	83.4057		control_fish05	_4	_5	41.13	10.54	30.59	-74.3739	74.3739
control_fish06	_5	_3	42.12		42.12				control_fish06	_5	-4	_7	60.75	9.21	51.54	-84.8395	84.8395		control_fish06	_5	_6	37.09	9.43	27.66	-74.5754	74.5754
control_fish07	_6	_5	12.86	1.23	11.63	-90.4355	90.4355		control_fish07	_6	_3	_6	71.71	29.47	42.24	-58.9039	58.9039		control_fish07	_6	_7	28.2	11.04	17.16	-60.8511	60.8511
control_fish08	_7	_9	36.43	1.23	35.2	-96.6237	96.6237		control_fish08	_7	_1	_2	68.88	20.67	48.21	-69.9913	69.9913		control_fish08	_7	_2	44.76	27.03	17.73	-39.6113	39.6113
control_fish09	_8	_	32.86	12.71	20.15	-61.3208	61.3208		control_fish09	_8	_2	_5	43.04	10.67	32.37	-75.2091	75.2091		control_fish09	_8	_4	40.12	19.57	20.55	-51.2213	51.2213
control_fish10	_9	_8	32.33	1.23	31.1	-96.1955	96.1955		control_fish10	_9	_1	_4	71.91	31.58	40.33	-56.084	56.084		control_fish10	_9	_9	40.59	23.25	17.34	-42.7199	42.7199
control_fish01	_	_4	29.27	7.49	21.78	-74.4107	74.4107		control_fish01	_	_6	_3	68.17	28.42	39.75	-58.3101	58.3101		control_fish01	_	_	42.15	19.99	22.16	-52.5741	52.5741
control_fish02	_1	_1	44.51	21.91	22.6	-50.7751	50.7751		control_fish02	_1	_5	_1	58.05	30.25	27.8	-47.8898	47.8898		control_fish02	_1	_8	40.34	16.51	23.83	-59.0729	59.0729
control_fish03	_2	_7	48.05	20.64	27.41	-57.0447	57.0447		control_fish03	_2	dead		79.87						control_fish03	_2	_3	52.37	21.93	30.44	-58.1249	58.1249
control_fish04	_3	_6	29.95	13.01	16.94	-56.5609	56.5609		control_fish04	_3	dead		70.39						control_fish04	_3	_1	45.38	21.08	24.3	-53.5478	53.5478
control_fish05	_4	_2	42.02	20.31	21.71	-51.6659	51.6659		control_fish05	_4	_	_1	46.14	4.39	41.75	-90.4855	90.4855		control_fish05	_4	_5	41.64	8.3	33.34	-80.0672	80.0672
control_fish06	_5	_3	22.32		22.32				control_fish06	_5	-4	_7	67.5	30.67	36.83	-54.563	54.563		control_fish06	_5	_6	48.63	6.19	42.44	-87.2712	87.2712
control_fish07	_6	_5	22.47	2.46	20.01	-89.0521	89.0521		control_fish07	_6	_3	_6	59.29	7.4	51.89	-87.519	87.519		control_fish07	_6	_7	53.69	12.62	41.07	-76.4947	76.4947
control_fish08	_7	_9	49.87	1.23	48.64	-97.5336	97.5336		control_fish08	_7	_1	_2	82.93	8.2	74.73	-90.1121	90.1121		control_fish08	_7	_2	51.65	14.49	37.16	-71.9458	71.9458
control_fish09	_8	_	45.9	21.51	24.39	-53.1373	53.1373		control_fish09	_8	_2	_5	51.42	17.61	33.81	-65.7526	65.7526		control_fish09	_8	_4	37.9	13.12	24.78	-65.3826	65.3826
control_fish10	_9	_8	39.49	1.85	37.64	-95.3153	95.3153		control_fish10	_9	_1	_4	58.9	30.01	28.89	-49.0492	49.0492		control_fish10	_9	_9	64.43	8.75	55.68	-86.4194	86.4194

## Sheet: effect size
migration RA											absolute	percentage
Mean group 1	32.11	Mean group 2	31.6	95% CI Mdiff [Low; High]	-4.39835	observed effect size	0.0401204	calculated effect size from GPower	0.554676	smallest significant difference	6.94733	21.636
SD group 1	12.16	SD group 2	13.06		5.41835			corrected unbiased effect size from GPower	0.550588	observed difference	0.51	1.58829
n group 1	52	n group 2	52	t	0.206094
				df	102
				p	0.837128
group 1	control
group 2	RA
bglap intensity RA											absolute	percentage
Mean group 1	1.813	Mean group 2	1.93	95% CI Mdiff [Low; High]	-0.161522	observed effect size	2.14821	calculated effect size from GPower	1.13777	smallest significant difference	0.0577675	3.18629
SD group 1	0.06129	SD group 2	0.04212		-0.0724779			corrected unbiased effect size from GPower	1.09854	observed difference	0.117	6.45339
n group 1	12	n group 2	12	t	-5.44994
				df	22
				p	1.78512e-05
group1	control
group2	RA
