# Supplementary material for: Zebrafish fin regeneration involves generic and regeneration-specific osteoblast injury responses
Source: eLife. 2022 Jun 24;11:e77614. doi: 10.7554/eLife.77614 (PMC9259016; doi:10.7554/eLife.77614)
Supplement: Figure 5—source data 1. [file elife-77614-fig5-data1.xlsx]

## Sheet: Fig 5 B
Well	Fluor	Content	Sample	Cq	Cq Mean	Amplification factor	Efficiency	Eamp corrected Cq
A01	SYBR	Unkn-01	actinb-FinI	15.73	15.79	1.96	0.964	15.3298
A02	SYBR	Unkn-01	actinb-FinI	15.86	15.79	1.96	0.964					DeltaCT GOI vs reference													Ufin_bact2	fin-6hpa_bact2	liver_bact2	Ufin_hatn10	fin-6hpa_hatn10	liver_hatn10	Mean reference genes-Ufin	Mean reference genes-fin-6hpa	Mean reference genes-liver
B01	SYBR	Unkn-02	actinb-FinII	20.77	20.9	1.96	0.964	20.2908				c3a.3_Fin 6hpa	c3a.3_UFin	c3a.3_liver	c3a.4_Fin 6hpa	c3a.4_UFin	c3a.4_liver	c3a.5_Fin 6hpa	c3a.5_UFin	c3a.5_liver	c3a.6_Fin 6hpa	c3a.6_UFin	c3a.6_liver		15.3298	14.0483	15.9997	17.5758	17.6507	17.2012	16.4528	15.8495	16.6004
B02	SYBR	Unkn-02	actinb-FinII	21.02	20.9	1.96	0.964					17.1206	18.531	5.02958	15.4038	18.7386	8.8212	16.2445	23.4912	10.243	21.3705	22.4575	1.98214		20.2908	13.922	16.1938	17.2868	17.7899	20.5729	18.7888	15.856	18.3834
C01	SYBR	Unkn-03	actinb-FinIII	14.82	14.81	1.96	0.964	14.3783				17.0852	17.8714	2.45658	13.1412	15.6976	7.39077	14.0114	19.6587	9.21602	24.119	24.6217	0.19919		14.3783	14.2036		17.3082	17.8327		15.8433	16.0181
C02	SYBR	Unkn-03	actinb-FinIII	14.8	14.81	1.96	0.964					17.7709	17.4062		15.5474	15.5812		16.5005	15.8261		21.6519	22.5512
D01	SYBR	Unkn-04	actinb-FinI_6hpa	14.4	14.47	1.96	0.964	14.0483					17.9362			16.6725			19.6587			23.2101
D02	SYBR	Unkn-04	actinb-FinI_6hpa	14.53	14.47	1.96	0.964
E01	SYBR	Unkn-05	actinb-FinII_6hpa	14.15	14.34	1.96	0.964	13.922				DeltaDeltaCt GOI rel, to control
E02	SYBR	Unkn-05	actinb-FinII_6hpa	14.53	14.34	1.96	0.964					c3a.3_Fin 6hpa	c3a.3_UFin	c3a.3_liver	c3a.4_Fin 6hpa	c3a.4_UFin	c3a.4_liver	c3a.5_Fin 6hpa	c3a.5_UFin	c3a.5_liver	c3a.6_Fin 6hpa	c3a.6_UFin	c3a.6_liver
F01	SYBR	Unkn-06	actinb-FinIII_6hpa	14.46	14.63	1.96	0.964	14.2036				-0.815588	0.594773	-12.9066	-1.26868	2.06615	-7.85127	-3.41417	3.83256	-9.41571	-1.83963	-0.752605	-21.228
F02	SYBR	Unkn-06	actinb-FinIII_6hpa	14.8	14.63	1.96	0.964					-0.850962	-0.0648102	-15.4796	-3.53127	-0.974912	-9.2817	-5.64723	0	-10.4427	0.908907	1.41157	-23.0109
G01	SYBR	Unkn-07	actinb-liverI	16.51	16.48	1.96	0.964	15.9997				-0.165286	-0.529963		-1.1251	-1.09124		-3.15822	-3.83256		-1.55826	-0.658965
G02	SYBR	Unkn-07	actinb-liverI	16.44	16.48	1.96	0.964
H01	SYBR	Unkn-08	actinb-liverII	16.62	16.68	1.96	0.964	16.1938				2^-(∆∆Ct)
H02	SYBR	Unkn-08	actinb-liverII	16.74	16.68	1.96	0.964					c3a.3_Fin 6hpa	c3a.3_UFin	c3a.3_liver	c3a.4_Fin 6hpa	c3a.4_UFin	c3a.4_liver	c3a.5_Fin 6hpa	c3a.5_UFin	c3a.5_liver	c3a.6_Fin 6hpa	c3a.6_UFin	c3a.6_liver
A03	SYBR	Unkn-07	hatn10-FinI	16.43	16.42	2.1	1.101	17.5758				1.76002	0.662148	7678.48	2.40941	0.238795	230.923	10.6603	0.0701915	682.985	3.57917	1.68483	2.45618e+06
A04	SYBR	Unkn-07	hatn10-FinI	16.4	16.42	2.1	1.101					1.8037	1.04595	45690.3	11.5616	1.96552	622.401	50.1171	1	1391.72	0.532588	0.375902	8.45241e+06
B03	SYBR	Unkn-08	hatn10-FinII	16.12	16.15	2.1	1.101	17.2868				1.12139	1.44389		2.18117	2.13057		8.92725	14.2467		2.94498	1.57895
B04	SYBR	Unkn-08	hatn10-FinII	16.17	16.15	2.1	1.101
C03	SYBR	Unkn-09	hatn10-FinIII	16.24	16.17	2.1	1.101	17.3082				log2 2^-(∆∆Ct)
C04	SYBR	Unkn-09	hatn10-FinIII	16.1	16.17	2.1	1.101					c3a.3_Fin 6hpa	c3a.3_UFin	c3a.3_liver	c3a.4_Fin 6hpa	c3a.4_UFin	c3a.4_liver	c3a.5_Fin 6hpa	c3a.5_UFin	c3a.5_liver	c3a.6_Fin 6hpa	c3a.6_UFin	c3a.6_liver
D03	SYBR	Unkn-10	hatn10-FinI_6hpa	16.42	16.49	2.1	1.101	17.6507				0.815588	-0.594773	12.9066	1.26868	-2.06615	7.85127	3.41417	-3.83256	9.41571	1.83963	0.752605	21.228
D04	SYBR	Unkn-10	hatn10-FinI_6hpa	16.55	16.49	2.1	1.101					0.850962	0.0648102	15.4796	3.53127	0.974912	9.2817	5.64723	0	10.4427	-0.908907	-1.41157	23.0109
E03	SYBR	Unkn-11	hatn10-FinII_6hpa	16.64	16.62	2.1	1.101	17.7899				0.165286	0.529963		1.1251	1.09124		3.15822	3.83256		1.55826	0.658965
E04	SYBR	Unkn-11	hatn10-FinII_6hpa	16.59	16.62	2.1	1.101
F03	SYBR	Unkn-12	hatn10-FinIII_6hpa	16.88	16.66	2.1	1.101	17.8327
F04	SYBR	Unkn-12	hatn10-FinIII_6hpa	16.44	16.66	2.1	1.101
G03	SYBR	Unkn-15	hatn10-liverI	16	16.07	2.1	1.101	17.2012
G04	SYBR	Unkn-15	hatn10-liverI	16.14	16.07	2.1	1.101
H03	SYBR	Unkn-16	hatn10-liverII	19.19	19.22	2.1	1.101	20.5729
H04	SYBR	Unkn-16	hatn10-liverII	19.24	19.22	2.1	1.101
A05	SYBR	Unkn-13	c3a.3-FinI	N/A	36.31	1.95	0.9488	34.9837
A06	SYBR	Unkn-13	c3a.3-FinI	36.31	36.31	1.95	0.9488
B05	SYBR	Unkn-14	c3a.3-FinII	N/A	38.05	1.95	0.9488	36.6602
B06	SYBR	Unkn-14	c3a.3-FinII	38.05	38.05	1.95	0.9488
C05	SYBR	Unkn-15	c3a.3-FinIII	33.01	34.51	1.95	0.9488	33.2495
C06	SYBR	Unkn-15	c3a.3-FinIII	36	34.51	1.95	0.9488
D05	SYBR	Unkn-16	c3a.3-FinI_6hpa	33.61	34.22	1.95	0.9488	32.9701
D06	SYBR	Unkn-16	c3a.3-FinI_6hpa	34.84	34.22	1.95	0.9488
E05	SYBR	Unkn-17	c3a.3-FinII_6hpa	33.46	34.19	1.95	0.9488	32.9412
E06	SYBR	Unkn-17	c3a.3-FinII_6hpa	34.92	34.19	1.95	0.9488
F05	SYBR	Unkn-18	c3a.3-FinIII_6hpa	35.87	35.07	1.95	0.9488	33.789
F06	SYBR	Unkn-18	c3a.3-FinIII_6hpa	34.28	35.07	1.95	0.9488
G05	SYBR	Unkn-23	c3a.3_liverI	22.33	22.45	1.95	0.9488	21.63
G06	SYBR	Unkn-23	c3a.3_liverI	22.57	22.45	1.95	0.9488
H05	SYBR	Unkn-24	c3a.3_liverII	21.63	21.63	1.95	0.9488	20.8399
H06	SYBR	Unkn-24	c3a.3_liverII	21.62	21.63	1.95	0.9488
A07	SYBR	Unkn-19	c3a.4-FinI	34.33	34.94	2.01	1.0109	35.1914
A08	SYBR	Unkn-19	c3a.4-FinI	35.55	34.94	2.01	1.0109
B07	SYBR	Unkn-20	c3a.4-FinII	34.23	34.24	2.01	1.0109	34.4864
B08	SYBR	Unkn-20	c3a.4-FinII	34.25	34.24	2.01	1.0109
C07	SYBR	Unkn-21	c3a.4-FinIII	30.76	31.2	2.01	1.0109	31.4245
C08	SYBR	Unkn-21	c3a.4-FinIII	31.64	31.2	2.01	1.0109
D07	SYBR	Unkn-22	c3a.4-FinI_6hpa	31.08	31.03	2.01	1.0109	31.2533
D08	SYBR	Unkn-22	c3a.4-FinI_6hpa	30.98	31.03	2.01	1.0109
E07	SYBR	Unkn-23	c3a.4-FinII_6hpa	28.74	28.79	2.01	1.0109	28.9972
E08	SYBR	Unkn-23	c3a.4-FinII_6hpa	28.84	28.79	2.01	1.0109
F07	SYBR	Unkn-24	c3a.4-FinIII_6hpa	31.12	31.34	2.01	1.0109	31.5655
F08	SYBR	Unkn-24	c3a.4-FinIII_6hpa	31.55	31.34	2.01	1.0109
G07	SYBR	Unkn-31	c3a.4_liverI	25.36	25.24	2.01	1.0109	25.4216
G08	SYBR	Unkn-31	c3a.4_liverI	25.12	25.24	2.01	1.0109
H07	SYBR	Unkn-32	c3a.4_liverII	25.68	25.59	2.01	1.0109	25.7741
H08	SYBR	Unkn-32	c3a.4_liverII	25.49	25.59	2.01	1.0109
A09	SYBR	Unkn-25	c3a.5-FinI	38.57	38.57	2.05	1.0476	39.944
A10	SYBR	Unkn-25	c3a.5-FinI	N/A	0	2.05	1.0476
B09	SYBR	Unkn-26	c3a.5-FinII	N/A	0	2.05	1.0476	0
B10	SYBR	Unkn-26	c3a.5-FinII	N/A	0	2.05	1.0476
C09	SYBR	Unkn-27	c3a.5-FinIII	30.32	30.58	2.05	1.0476	31.6694
C10	SYBR	Unkn-27	c3a.5-FinIII	30.83	30.58	2.05	1.0476
D09	SYBR	Unkn-28	c3a.5-FinI_6hpa	30.51	30.99	2.05	1.0476	32.094
D10	SYBR	Unkn-28	c3a.5-FinI_6hpa	31.47	30.99	2.05	1.0476
E09	SYBR	Unkn-29	c3a.5-FinII_6hpa	28.55	28.84	2.05	1.0476	29.8674
E10	SYBR	Unkn-29	c3a.5-FinII_6hpa	29.12	28.84	2.05	1.0476
F09	SYBR	Unkn-30	c3a.5-FinIII_6hpa	31.25	31.4	2.05	1.0476	32.5186
F10	SYBR	Unkn-30	c3a.5-FinIII_6hpa	31.54	31.4	2.05	1.0476
G09	SYBR	Unkn-39	c3a.5_liverI	25.89	25.92	2.05	1.0476	26.8434
G10	SYBR	Unkn-39	c3a.5_liverI	25.94	25.92	2.05	1.0476
H09	SYBR	Unkn-40	c3a.5_liverII	26.6	26.65	2.05	1.0476	27.5994
H10	SYBR	Unkn-40	c3a.5_liverII	26.7	26.65	2.05	1.0476
A11	SYBR	Unkn-31	c3a.6-FinI	35.45	35.45	2.14	1.1446	38.9103
A12	SYBR	Unkn-31	c3a.6-FinI	N/A	0	2.14	1.1446
B11	SYBR	Unkn-32	c3a.6-FinII	39.55	39.55	2.14	1.1446	43.4105
B12	SYBR	Unkn-32	c3a.6-FinII	N/A	0	2.14	1.1446
C11	SYBR	Unkn-33	c3a.6-FinIII	34.36	34.98	2.14	1.1446	38.3944
C12	SYBR	Unkn-33	c3a.6-FinIII	35.61	34.98	2.14	1.1446
D11	SYBR	Unkn-34	c3a.6-FinI_6hpa	33.91	33.91	2.14	1.1446	37.22
D12	SYBR	Unkn-34	c3a.6-FinI_6hpa	N/A	0	2.14	1.1446
E11	SYBR	Unkn-35	c3a.6-FinII_6hpa	N/A	36.42	2.14	1.1446	39.975
E12	SYBR	Unkn-35	c3a.6-FinII_6hpa	36.42	36.42	2.14	1.1446
F11	SYBR	Unkn-36	c3a.6-FinIII_6hpa	34.32	34.32	2.14	1.1446	37.67
F12	SYBR	Unkn-36	c3a.6-FinIII_6hpa	N/A	0	2.14	1.1446
G11	SYBR	Unkn-47	c3a.6_liverI	18.5	18.58	2.14	1.1446	20.3936
G12	SYBR	Unkn-47	c3a.6_liverI	18.65	18.58	2.14	1.1446
H11	SYBR	Unkn-48	c3a.6_liverII	17.03	16.93	2.14	1.1446	18.5826
H12	SYBR	Unkn-48	c3a.6_liverII	16.83	16.93	2.14	1.1446

## Sheet: Fig 5C
width / length
control_seg-3	W54011_seg-3	control_seg-2	W54011_seg-2	control_seg-1	W54011_seg-1
0.366688	0.339891	0.221973	0.57677	0.203122	0.3911
0.440976	0.41397	0.259124	0.386859	0.158842	0.454915
0.345135	0.20988	0.315446	0.263462	0.190355	0.334945
0.276934	0.370013	0.327413	0.359357	0.170946	0.335043
0.255804	0.279918	0.390541	0.354906	0.316392	0.206905
0.44358	0.176428	0.192458	0.273987	0.096873	0.299854
0.367899	0.231247	0.307308	0.321519	0.251016	0.370091
0.31889	0.169742	0.439877	0.521529	0.243769	0.42806
0.448844	0.224885	0.322688	0.49456	0.179227	0.300264
0.368821	0.311293	0.305633	0.275511	0.178763	0.320252
0.310274	0.273986	0.292948	0.283791	0.241225	0.411464
0.468158	0.400876	0.227876	0.174141	0.148588	0.243833
0.239017	0.287034	0.230373	0.25322	0.235104	0.167408
0.417	0.279285	0.309992	0.35827	0.144214	0.338909
0.42635	0.290451	0.368095	0.372777	0.186372	0.301726
0.293172	0.42582	0.246652	0.558911	0.153817	0.366
0.476731	0.420476	0.314753	0.413166	0.142323	0.47017
0.490996	0.426931	0.344642	0.409459	0.206982	0.35395
0.391028	0.339776	0.316638	0.246078	0.238064	0.20138
0.413194	0.34017	0.252833	0.338559	0.149656	0.236705
0.47705	0.371104	0.184933	0.296778	0.15557	0.327228
0.491609	0.311499	0.157273	0.129216	0.16151	0.334547
0.339729	0.305602	0.27599	0.219662	0.241841	0.356845
0.291533	0.25788	0.232317	0.226652	0.188477	0.332008
0.415012	0.323045	0.25269	0.361235	0.133255	0.325429
0.259078	0.210461	0.213454	0.39339	0.184213	0.328082
0.451875	0.453229	0.212805	0.333966	0.154789	0.404079
0.357835	0.419082	0.201891	0.300889	0.106295	0.321046
0.365513	0.335854	0.369712	0.305336	0.201717	0.323049
0.497039	0.359496	0.357353	0.391941	0.248079	0.318635
0.463151	0.331929	0.56662	0.309113	0.206847	0.352095
0.338297	0.468787	0.455704	0.21758	0.155059	0.24187
0.285135	0.542194	0.372505	0.274385	0.19325	0.363229
0.370322	0.398759	0.362081	0.434902	0.270189	0.187199
0.332115	0.41733	0.368193	0.323857	0.119247	0.254619
0.249576	0.303195	0.322988	0.345972	0.141504	0.299894
0.297978	0.273612	0.306721	0.423324	0.166611	0.158926
0.380949	0.365893	0.381594	0.25664	0.179667	0.279048
0.33282	0.392258	0.449805	0.367925	0.0966958	0.229085
0.320641	0.38571	0.335841	0.351476	0.186845	0.365433
0.393272	0.368164	0.300844	0.261727	0.13317	0.374402
0.36557	0.313734	0.180469	0.27739	0.141862	0.192265
0.363741	0.302234	0.322308	0.309235	0.154255	0.254231
0.4072	0.370232	0.209479	0.26699	0.226322	0.323185
0.310141	0.354666	0.335336	0.361037	0.171377	0.539023
0.321725	0.310086	0.207948	0.318061	0.241576	0.328668
0.295344	0.365665	0.228213	0.315903	0.213472	0.425564
0.386089	0.308033	0.251423	0.384517	0.188295	0.279699
0.412901	0.241362	0.268345	0.310202	0.257031	0.336784
0.215914	0.271333	0.264968	0.316393	0.196304	0.218198
0.325183	0.28888	0.437013	0.456303	0.163447	0.204308
0.276545	0.265335	0.37306	0.300205	0.223406	0.326755
0.284342	0.246149	0.469762	0.294474	0.223359	0.297048
0.396933	0.334026	0.219474	0.224502	0.31251	0.209311
0.485053	0.496244	0.363762	0.541613	0.210379	0.191116
0.322117	0.384915	0.329281	0.420312	0.170877	0.377705
0.349531	0.24589	0.364387	0.362679	0.200748	0.539719
0.325377	0.196968	0.331677	0.45815	0.142463	0.347393
0.378407	0.180621	0.316305	0.415399	0.244455	0.321541
0.222798	0.357775	0.307799	0.535651	0.292117	0.4085
0.48273	0.391484	0.228216	0.397447	0.230035	0.479506
0.445673	0.367795	0.269859	0.407357	0.153809	0.395235
0.277486	0.423059	0.303707	0.313586	0.195657	0.43455
0.270824	0.48455	0.283034	0.413421	0.0682624	0.220206
0.304617	0.189235	0.371589	0.262227	0.0582852	0.166038
0.329922	0.460088	0.392388	0.298724	0.0736459	0.304202
0.30834	0.45803	0.500033	0.247719	0.165056	0.146237
0.378349	0.348118	0.268732	0.322143	0.129107	0.306631
0.390101	0.338207	0.184433	0.319677	0.144237	0.265899
0.266937	0.280115	0.604994	0.35089	0.157906	0.129017
0.383072	0.330366	0.608581	0.291703	0.158647	0.51615
0.399913	0.318848	0.578905	0.365238	0.140999	0.514639
0.345432	0.406454	0.419991	0.426446	0.164762	0.297891
0.350948	0.456019	0.365909	0.322984	0.198433	0.332551
0.337134	0.497342	0.262864	0.360341	0.318242	0.351025
0.337074	0.316164	0.239014	0.28	0.172956	0.356955
0.286507	0.369722	0.349933	0.49117	0.212337	0.391
0.313904	0.375959	0.378412	0.315842	0.331122	0.317919
0.342013	0.381517	0.409843	0.480198	0.173481	0.502867
0.575923	0.458744	0.322344	0.360019	0.171543	0.259524
0.331815	0.463065	0.357042	0.447054	0.223845	0.246134
0.366964	0.397701	0.357339	0.391886	0.190025	0.249049
0.416751	0.382985	0.234616	0.42583	0.266975	0.289864
0.344349	0.467476	0.27198	0.3108	0.174415	0.368159
0.308561	0.418737	0.252598	0.331766	0.193512	0.40707
0.432836	0.384279	0.211655	0.577765	0.249665	0.42098
0.328716	0.511167	0.238767	0.373046	0.235132	0.356705
0.294722	0.521452	0.390172	0.452854	0.10733	0.44192
0.595803	0.267635	0.277195	0.480476	0.100585	0.362269
0.297243	0.356636	0.380293	0.343207	0.154173	0.305458
0.351933	0.325071	0.555556	0.456689	0.263952	0.442202
0.469355	0.581136	0.442446	0.450097	0.239822	0.563953
0.53582	0.48541	0.495009	0.281114	0.133538	0.372093
0.365725	0.446004	0.500566	0.466436	0.23994	0.356732
0.459701	0.449356	0.476134	0.284413	0.183493	0.352529
0.379165	0.377629	0.413373	0.536705	0.157746	0.444207
0.383627	0.383592	0.525818	0.397917	0.210235	0.358093
0.508993	0.364121	0.375986	0.280325	0.15268	0.384501
0.367464	0.310533	0.287076	0.436551	0.182741	0.315738
0.397777	0.351864	0.312716	0.356661	0.203114	0.593383
0.512591	0.372411	0.376379	0.326169	0.186813	0.59403
0.480119	0.342566	0.492465	0.388594	0.280747	0.307644
0.513564	0.471886	0.406309	0.327596	0.322001	0.419355
0.443688	0.373757	0.382846	0.2156	0.345588	0.389952
0.322647	0.504191	0.343086	0.385214	0.23002	0.311851
0.583236	0.434184	0.309481	0.308492	0.276123	0.33245
0.381175	0.337662	0.320906	0.420087	0.25161	0.475135
0.316704	0.473475	0.39104	0.450719	0.328675	0.390939
0.340387	0.300999	0.360915	0.264688	0.216744	0.603392
0.597072	0.304124	0.495013	0.332589	0.165966	0.389378
0.39685	0.368937	0.461686	0.427366	0.229386	0.36701
0.465753	0.422386	0.426463	0.461694	0.154892	0.576513
0.375563	0.357013	0.380302	0.441119	0.162589	0.351115
0.456496	0.362429	0.379621	0.366955	0.205357	0.352623
0.456099	0.536082	0.292164	0.27947	0.147579	0.31026
0.286618	0.469066	0.317548	0.318135	0.230594	0.346848

## Sheet: Fig 5D
width / length
control_seg-3_SB	SB290157_seg-3	control_seg-2_SB	SB290157_seg-2	control_seg-1_SB	SB290157_seg-1
0.35624	0.26599	0.311405	0.340026	0.167604	0.363159
0.237667	0.408631	0.10984	0.310986	0.228986	0.379066
0.300484	0.280819	0.413039	0.252087	0.186031	0.461479
0.343505	0.389663	0.411047	0.326973	0.170514	0.309854
0.398961	0.315854	0.376242	0.418021	0.20838	0.454079
0.308929	0.323883	0.375739	0.258889	0.123497	0.47617
0.303841	0.344037	0.310226	0.389202	0.235403	0.381162
0.171225	0.463331	0.266054	0.320842	0.214671	0.33606
0.26532	0.391387	0.447395	0.369011	0.141966	0.473702
0.33719	0.313729	0.326465	0.367347	0.205468	0.249501
0.297635	0.358885	0.344767	0.329229	0.206781	0.292893
0.329678	0.28471	0.445494	0.334602	0.191669	0.341062
0.445656	0.321483	0.327928	0.294701	0.105404	0.361048
0.570139	0.384256	0.225306	0.318587	0.316151	0.572568
0.311467	0.449415	0.414502	0.485697	0.17238	0.13606
0.361783	0.390086	0.381705	0.285642	0.183537	0.361783
0.311589	0.37156	0.299868	0.436913	0.238761	0.311589
0.394984	0.223236	0.353782	0.376733	0.235866	0.323975
0.385177	0.373154	0.350166	0.3192	0.180741	0.484996
0.358094	0.331949	0.322584	0.421073	0.203955	0.360726
0.389147	0.366776	0.331635	0.24685	0.259329	0.410953
0.298235	0.412246	0.276071	0.469757	0.200999	0.247997
0.393884	0.274444	0.161487	0.325969	0.195739	0.381924
0.381303	0.306966	0.376291	0.421421	0.167649	0.45556
0.33876	0.45794	0.502394	0.495192	0.169752	0.363831
0.38447	0.168594	0.442729	0.345361	0.228784	0.350995
0.346294	0.401218	0.355987	0.329775	0.153393	0.448864
0.35721	0.490296	0.272556	0.439686	0.154329	0.35721
0.320629	0.28864	0.487755	0.324295	0.13901	0.40325
0.214818	0.372055	0.40677	0.335731	0.17738	0.36631
0.248957	0.294403	0.229723	0.346747	0.230129	0.273052
0.242726	0.19714	0.156081	0.285042	0.175504	0.492908
0.25331	0.266853	0.222351	0.367528	0.255448	0.284996
0.451081	0.273478	0.486316	0.469828	0.227604	0.255303
0.393902	0.399471	0.334548	0.460956	0.216531	0.411208
0.240427	0.368689	0.442729	0.463021	0.23207	0.323975
0.254109	0.490755	0.292819	0.404396	0.212713	0.361139
0.255303	0.347859	0.447895	0.299474	0.16358	0.417904

## Sheet: Fig 5E
CS_006											CS_016											CS_012
	0dpa	1dpa	distance 1st joint - gfp 2nd segment (µm) 0dpa	distance 1st joint - gfp 2nd segment (µm) 1dpa	D distance 1st joint 1 dpa	mean D distance 1st joint 1 dpa	% distance 1st joint change	migration (%)	mean % distance change			0dpa	1dpa	distance 1st joint - gfp segment -1 (µm) 0dpa	distance 1st joint - gfp segment -1 (µm) 1dpa	D distance 1st joint	% distance 1st joint change	migration (%)	mean D distance 1st joint	mean % distance change			0dpa	1dpa	distance 1st joint - gfp segment -1 (µm) 0dpa	distance 1st joint - gfp segment -1 (µm) 1dpa	D distance	mean D distance	% distance 1st joint change	migration (%)	mean % distance
W54011_fish01	_	_2	81.082	62.82	18.262	14.9195	-22.5229	22.5229	-23.8638		PMX_fish01	_	_3	40.51	20.59	19.92	-49.173	49.173	14.555	-38.6385		SB290157_fish01	_	_5	59	28.26	30.74	17.295	-52.1017	52.1017	-29.6864
W54011_fish02	_1	dead	72.281								PMX_fish02	_1	dead	47.34								SB290157_fish02	_1	_10	54.98	44.91	10.07	14.51	-18.3158	18.3158	-25.9963
W54011_fish03	_2	_1	61.233	45.89	15.343	23.2325	-25.0568	25.0568	-40.7882		PMX_fish03	_2	_8	54.28	40.06	14.22	-26.1975	26.1975	16.205	-31.4059		SB290157_fish03	_2	_3	55.83	36.94	18.89	25.015	-33.8349	33.8349	-38.8316
W54011_fish04	_3	_8	84.312	83.885	0.427	13.0855	-0.506452	0.506452	-23.6106		PMX_fish04	_3	_2	45.57	37.55	8.02	-17.5993	17.5993	5.89	-14.6345		SB290157_fish04	_3	_8	66.99	59.26	7.73	19.26	-11.539	11.539	-32.6322
W54011_fish05	_4	_	68.516	52.175	16.341	22.377	-23.8499	23.8499	-36.8973		PMX_fish05	_4	_4	42.39	40.86	1.53	-3.60934	3.60934	12.82	-25.9243		SB290157_fish05	_4	_	64.49	30.74	33.75	29.9	-52.3337	52.3337	-45.7828
W54011_fish06	_5	_4	85.161	85.522	-0.361	7.486	0.423903	-0.423903	-16.3399		PMX_fish06	_5	_6	27.61	24.93	2.68	-9.70663	9.70663	12.25	-29.6939		SB290157_fish06	_5	_9	63.18	25.53	37.65	36.045	-59.5916	59.5916	-54.4486
W54011_fish07	_6	_6	75.438	32.21	43.228	34.938	-57.3027	57.3027	-54.2528		PMX_fish07	_6	_7	42.99	36.58	6.41	-14.9104	14.9104	12.165	-28.0719		SB290157_fish07	_6	_1	51.3	26.79	24.51	20.47	-47.7778	47.7778	-38.8525
W54011_fish08	_7	_5	66.924	62.969	3.955	3.199	-5.90969	5.90969	-5.79918		PMX_fish08	_7	_1	43.65	23.15	20.5	-46.9645	46.9645	19.245	-42.2414		SB290157_fish08	_7	_6	56.91	30.85	26.06	19.165	-45.7916	45.7916	-32.6525
W54011_fish09	_8	_7	62.969	56.43	6.539	19.0285	-10.3845	10.3845	-32.318		PMX_fish09	_8	_	39.68	23.2	16.48	-41.5323	41.5323	12.395	-30.7397		SB290157_fish09	_8	_2	55.6	37.49	18.11	25.805	-32.5719	32.5719	-38.554
W54011_fish10	_9	_3	70.653	68.461	2.192	5.2195	-3.10249	3.10249	-10.9673		PMX_fish10	_9	_5	47.82	37.04	10.78	-22.5429	22.5429	8.725	-21.2834		SB290157_fish10	_9	_4	53.57	26.79	26.78	23.435	-49.9907	49.9907	-42.1868
W54011_fish01	_	_2	45.932	34.355	11.577	5.7885	-25.2047	25.2047			PMX_fish01	_	_3	32.7	23.51	9.19	-28.104	28.104				SB290157_fish11	_10	_7	68.59	27.82	40.77	30.52	-59.4402	59.4402	-47.3861
W54011_fish02	_1	dead	47.745								PMX_fish02	_1	dead	41.18								SB290157_fish01	_	_5	52.95	49.1	3.85		-7.27101	7.27101
W54011_fish03	_2	_1	55.064	23.942	31.122		-56.5197	56.5197			PMX_fish03	_2	_8	49.68	31.49	18.19	-36.6143	36.6143				SB290157_fish02	_1	_10	56.27	37.32	18.95		-33.6769	33.6769
W54011_fish04	_3	_8	55.109	29.365	25.744		-46.7147	46.7147			PMX_fish04	_3	_2	32.22	28.46	3.76	-11.6698	11.6698				SB290157_fish03	_2	_3	71.05	39.91	31.14		-43.8283	43.8283
W54011_fish05	_4	_	56.889	28.476	28.413		-49.9446	49.9446			PMX_fish05	_4	_4	49.98	25.87	24.11	-48.2393	48.2393				SB290157_fish04	_3	_8	57.31	26.52	30.79		-53.7254	53.7254
W54011_fish06	_5	_4	46.318	30.985	15.333		-33.1038	33.1038			PMX_fish06	_5	_6	43.92	22.1	21.82	-49.6812	49.6812				SB290157_fish05	_4	_	66.4	40.35	26.05		-39.2319	39.2319
W54011_fish07	_6	_6	52.044	25.396	26.648		-51.2028	51.2028			PMX_fish07	_6	_7	43.46	25.54	17.92	-41.2333	41.2333				SB290157_fish06	_5	_9	69.85	35.41	34.44		-49.3057	49.3057
W54011_fish08	_7	_5	42.945	40.502	2.443		-5.68867	5.68867			PMX_fish08	_7	_1	47.95	29.96	17.99	-37.5182	37.5182				SB290157_fish07	_6	_1	54.9	38.47	16.43		-29.9271	29.9271
W54011_fish09	_8	_7	58.096	26.578	31.518		-54.2516	54.2516			PMX_fish09	_8	_	41.66	33.35	8.31	-19.9472	19.9472				SB290157_fish08	_7	_6	62.88	50.61	12.27		-19.5134	19.5134
W54011_fish10	_9	_3	43.792	35.545	8.247		-18.8322	18.8322			PMX_fish10	_9	_5	33.31	26.64	6.67	-20.024	20.024				SB290157_fish09	_8	_2	75.22	41.72	33.5		-44.536	44.536
																						SB290157_fish10	_9	_4	58.43	38.34	20.09		-34.383	34.383
control_fish01	_	_4	75.221	41.381	33.84	47.234	-44.9874	44.9874	-70.7606		control_fish01	_	_5	42.15	16.62	25.53	-60.5694	60.5694	23.075	-59.5246		SB290157_fish11	_10	_7	57.37	37.1	20.27		-35.3321	35.3321
control_fish02	_1	dead	74.987								control_fish02	_1	_4	54.28	17.21	37.07	-68.294	68.294	33.89	-68.3148
control_fish03	_2	_8	77.055	30		11.6585	-61.0668	61.0668	-50.723		control_fish03	_2	_1	49.86	19.31	30.55	-61.2716	61.2716	32.385	-74.9852		control_fish01	_	_2	65.2	23.21	41.99	35.825	-64.4018	64.4018	-57.5948
control_fish04	_3	_9	75.427	39.876	35.551	40.134	-47.133	47.133	-64.9083		control_fish04	_3	_2	66.38	35.63	30.75	-46.3242	46.3242	31.875	-55.8613		control_fish02	_1	_3	79.64	30.21	49.43	38.56	-62.0668	62.0668	-59.8531
control_fish05	_4	_2	70	33.727	36.273	47.3195	-51.8186	51.8186	-73.4038		control_fish05	_4	_7	47.54	10.91	36.63	-77.0509	77.0509	34.25	-70.1488		control_fish03	_2	_4	95.55	17.67	77.88	54.76	-81.5071	81.5071	-72.4315
control_fish06	_5	_3	52.675	25.89	26.785	38.4885	-50.8495	50.8495	-73.3463		control_fish06	_5	_3	37.55	29.64	7.91	-21.0652	21.0652	22.985	-57.8239		control_fish04	_3	_	60.31	17.32	42.99	39.885	-71.2817	71.2817	-63.2701
control_fish07	_6	_5	88.648	39.644	49.004	51.0065	-55.2793	55.2793	-71.8913		control_fish07	_6	_	32.22	11.25	20.97	-65.0838	65.0838	27.095	-70.6645		control_fish05	_4	_6	63.18	26.92	36.26	36.14	-57.3916	57.3916	-56.2298
control_fish08	_7	_6	54.768	29.028	25.74	30.0665	-46.9982	46.9982	-51.1689		control_fish08	_7	_9	39.34	16.69	22.65	-57.575	57.575	25.875	-63.1197		control_fish06	_5	_8	81.22	17.82	63.4	55.665	-78.0596	78.0596	-80.1361
control_fish09	_8	_7	51.281	29.549	21.732	29.101	-42.3783	42.3783	-51.7766		control_fish09	_8	_6	36.03	18.77	17.26	-47.9045	47.9045	22.97	-56.403		control_fish07	_6	_5	72.28	12.17	60.11	45.355	-83.1627	83.1627	-66.9041
control_fish10	_9	_	66.419	23.333	43.086	42.061	-64.87	64.87	-66.4903		control_fish10	_9	_8	41.98	13.19	28.79	-68.5803	68.5803	23.595	-60.9491		control_fish08	_7	_10	62.42	29.96	32.46	36.195	-52.0026	52.0026	-56.7167
control_fish01	_	_4	62.805	2.177	60.628		-96.5337	96.5337			control_fish01	_	_5	35.26	14.64	20.62	-58.4799	58.4799				control_fish09	_8	_7	57.6	24.25	33.35	45.725	-57.8993	57.8993	-74.0443
control_fish02	_1	dead	42.945								control_fish02	_1	_4	44.94	14.23	30.71	-68.3356	68.3356				control_fish10	_9	_9	67.9	16.01	51.89	47.225	-76.4212	76.4212	-67.3973
control_fish03	_2	_8	57.745	34.428	23.317		-40.3793	40.3793			control_fish03	_2	_1	38.58	4.36	34.22	-88.6988	88.6988				control_fish11	_10	_1	70.48	24.46	46.02	41.585	-65.2951	65.2951	-61.0888
control_fish04	_3	_9	54.082	9.365	44.717		-82.6837	82.6837			control_fish04	_3	_2	50.46	17.46	33	-65.3983	65.3983				control_fish01	_	_2	58.4	28.74	29.66		-50.7877	50.7877
control_fish05	_4	_2	61.445	3.079	58.366		-94.989	94.989			control_fish05	_4	_7	50.39	18.52	31.87	-63.2467	63.2467				control_fish02	_1	_3	48.04	20.35	27.69		-57.6395	57.6395
control_fish06	_5	_3	52.369	2.177	50.192		-95.843	95.843			control_fish06	_5	_3	40.24	2.18	38.06	-94.5825	94.5825				control_fish03	_2	_4	49.94	18.3	31.64		-63.356	63.356
control_fish07	_6	_5	59.895	6.886	53.009		-88.5032	88.5032			control_fish07	_6	_	43.57	10.35	33.22	-76.2451	76.2451				control_fish04	_3	_	66.56	29.78	36.78		-55.2584	55.2584
control_fish08	_7	_6	62.149	27.756	34.393		-55.3396	55.3396			control_fish08	_7	_9	42.38	13.28	29.1	-68.6645	68.6645				control_fish05	_4	_6	65.41	29.39	36.02		-55.068	55.068
control_fish09	_8	_7	59.616	23.146	36.47		-61.1749	61.1749			control_fish09	_8	_6	44.19	15.51	28.68	-64.9016	64.9016				control_fish06	_5	_8	58.3	10.37	47.93		-82.2127	82.2127
control_fish10	_9	_	60.249	19.213	41.036		-68.1107	68.1107			control_fish10	_9	_8	34.51	16.11	18.4	-53.3179	53.3179				control_fish07	_6	_5	60.42	29.82	30.6		-50.6455	50.6455
																						control_fish08	_7	_10	65	25.07	39.93		-61.4308	61.4308
CS_009											CS_017											control_fish09	_8	_7	64.42	6.32	58.1		-90.1894	90.1894
	0dpa	1dpa	distance 1st joint - gfp 2nd segment (µm) 0dpa	distance 1st joint - gfp 2nd segment (µm) 1dpa	D distance 1st joint 1 dpa	% distance 1st joint change	migration (%)	mean % distance 1st joint change				0dpa	1dpa	distance 1st joint - gfp segment -1 (µm) 0dpa	distance 1st joint - gfp segment -1 (µm) 1dpa	D distance 1st joint	% distance 1st joint change	migration (%)	mean D distance 1st joint	mean % distance change		control_fish10	_9	_9	72.91	30.35	42.56		-58.3733	58.3733
W54011_fish01	_	_3	68.959	24.436	44.523	-64.5645	64.5645	-37.1701			PMX_fish01	_	_9	61.98	32.7	29.28	-47.241	47.241	20.05	-36.1902		control_fish11	_10	_1	65.31	28.16	37.15		-56.8826	56.8826
W54011_fish02	_1	_6	26.792	18.822	7.97	-29.7477	29.7477	-11.8686			PMX_fish02	_1	_4	44.43	31.81	12.62	-28.4042	28.4042	10.305	-26.6012
W54011_fish03	_2	_8	35.897	18.11	17.787	-49.5501	49.5501	-38.7733			PMX_fish03	_2	_7	64.19	28.16	36.03	-56.1302	56.1302	21.07	-36.601		CS_013
W54011_fish04	_3	_2	35.368	14.401	20.967	-59.2824	59.2824	-28.8845			PMX_fish04	_3	_	47.54	46.93	0.61	-1.28313	1.28313	9.69	-30.7121			0dpa	1dpa	distance 1st joint - gfp 2nd segment (µm) 0dpa	distance 1st joint - gfp 2nd segment (µm) 1dpa	D distance 1st joint	mean D distance 1st joint	% distance 1st joint change	migration (%)	mean % distance
W54011_fish05	_4	_5	47.334	46.438	0.896	-1.89293	1.89293	-14.8554			PMX_fish05	_4	_5	31.81	23.61	8.2	-25.7781	25.7781	4.075	-12.7885		SB290157_fish01	_	_6	65.18	59.53	5.65	10.945	-8.6683	8.6683	-19.2414
W54011_fish06	_5	0 dpa empty	45.113								PMX_fish06	_5	_1	46.93	37.32	9.61	-20.4773	20.4773	8.735	-22.3124		SB290157_fish02	_1	_3	69.54	38.2	31.34	29.79	-45.0676	45.0676	-45.9113
W54011_fish07	_6	_	63.424	61.185	2.239	-3.53021	3.53021	-19.6676			PMX_fish07	_6	_2	34.68	30.39	4.29	-12.3702	12.3702	6.615	-18.2336		SB290157_fish03	_2	_8	54.13	42.73	11.4	12.025	-21.0604	21.0604	-21.0021
W54011_fish08	_7	0 dpa empty	35.113								PMX_fish08	_7	_3	38.18	36.68	1.5	-3.92876	3.92876	1.29	-3.37873		SB290157_fish04	_3	_5	64.76	63.17	1.59	4.15	-2.45522	2.45522	-8.96516
W54011_fish09	_8	0 dpa empty	64.891								PMX_fish09	_8	_10	41.55	39.68	1.87	-4.5006	4.5006	2.55	-7.98539		SB290157_fish05	_4	_9	72.31	42.71	29.6	30.96	-40.9349	40.9349	-45.3634
W54011_fish10											PMX_fish10	_9	_8	34.51	34.09	0.42	-1.21704	1.21704	6.62	-13.877		SB290157_fish06	_5	_	65.83	28.96	36.87	22.49	-56.0079	56.0079	-36.4151
W54011_fish01	_	_3	46.237	41.717	4.52	-9.77572	9.77572				PMX_fish11	_10	_6	33.31	26.37	6.94	-20.8346	20.8346	8.14	-21.2677		SB290157_fish07	_6	_4	72.23	48.21	24.02	26.975	-33.2549	33.2549	-35.7203
W54011_fish02	_1	_6	25.971	27.532	-1.561	6.01055	-6.01055				PMX_fish01	_	_9	43.04	32.22	10.82	-25.1394	25.1394				SB290157_fish08	_7	_1	53.61	50.51	3.1	10.46	-5.7825	5.7825	-17.5724
W54011_fish03	_2	_8	44.845	32.29	12.555	-27.9964	27.9964				PMX_fish02	_1	_4	32.22	24.23	7.99	-24.7983	24.7983				SB290157_fish09	_8	_2	59.78	38.23	21.55	22.26	-36.0488	36.0488	-35.1739
W54011_fish04	_3	_2	38.061	38.637	-0.576	1.51336	-1.51336				PMX_fish03	_2	_7	35.79	29.68	6.11	-17.0718	17.0718				SB290157_fish10	_9	_7	66.18	34.09	32.09	16.045	-48.489	48.489	-24.2445
W54011_fish05	_4	_5	34.848	25.154	9.694	-27.818	27.818				PMX_fish04	_3	_	31.21	12.44	18.77	-60.141	60.141				SB290157_fish01	_	_6	54.47	38.23	16.24		-29.8146	29.8146
W54011_fish06	_5	0 dpa empty	45.085								PMX_fish05	_4	_5	24.88	24.93	-0.05	0.200965	-0.200965				SB290157_fish02	_1	_3	60.4	32.16	28.24		-46.755	46.755
W54011_fish07	_6	_	69.317	44.498	24.819	-35.8051	35.8051				PMX_fish06	_5	_1	32.55	24.69	7.86	-24.1475	24.1475				SB290157_fish03	_2	_8	60.4	47.75	12.65		-20.9437	20.9437
W54011_fish08	_7	0 dpa empty	33.948								PMX_fish07	_6	_2	37.1	28.16	8.94	-24.097	24.097				SB290157_fish04	_3	_5	43.36	36.65	6.71		-15.4751	15.4751
W54011_fish09	_8	0 dpa empty	42.58								PMX_fish08	_7	_3	38.18	37.1	1.08	-2.82871	2.82871				SB290157_fish05	_4	_9	64.91	32.59	32.32		-49.792	49.792
W54011_fish10											PMX_fish09	_8	_10	28.16	24.93	3.23	-11.4702	11.4702				SB290157_fish06	_5	_	48.21	40.1	8.11		-16.8222	16.8222
											PMX_fish10	_9	_8	48.31	35.49	12.82	-26.5369	26.5369				SB290157_fish07	_6	_4	78.38	48.45	29.93		-38.1858	38.1858
control_fish01	_	_3	54.932	18.729	36.203	-65.9051	65.9051	-78.8001			PMX_fish11	_10	_6	43.04	33.7	9.34	-21.7007	21.7007				SB290157_fish08	_7	_1	60.69	42.87	17.82		-29.3623	29.3623
control_fish02	_1	_8	32.273	8.663	23.61	-73.1571	73.1571	-82.1063														SB290157_fish09	_8	_2	66.97	44	22.97		-34.2989	34.2989
control_fish03	_2	_7	66.751	31.163	35.588	-53.3146	53.3146	-61.812			control_fish01	_	_6	46.42	20.59	25.83	-55.6441	55.6441	25.35	-57.1084		SB290157_fish10	_9	_7	53.61	53.61	0		0	0
control_fish04	_3	_	51.951	24.315	27.636	-53.1963	53.1963	-73.5669			control_fish02	_1	_7	48.24	4.63	43.61	-90.4022	90.4022	31.89	-66.936
control_fish05	_4	_1	52.485	28.706	23.779	-45.3063	45.3063	-70.9534			control_fish03	_2	_5	38.7	21.06	17.64	-45.5814	45.5814	18.295	-48.4335		control_fish01	_	_6	77.62	36.22	41.4	35.575	-53.3368	53.3368	-48.4888
control_fish06	_5	_2	57.052	21.931	35.121	-61.5596	61.5596	-78.5921			control_fish04	_3	_9	37.96	10.35	27.61	-72.7345	72.7345	21.56	-61.8436		control_fish02	_1	_5	63.24	19.63	43.61	35.705	-68.9595	68.9595	-58.4246
control_fish07	_6	_4	44.709	4.462	40.247	-90.0199	90.0199	-59.4477			control_fish05	_4	_4	46.04	22.44	23.6	-51.2598	51.2598	25.69	-65.6818		control_fish03	_2	dead	61.36
control_fish08	_7	_6	51.039	24.783	26.256	-51.443	51.443	-48.6281			control_fish06	_5	_3	47.86	26.23	21.63	-45.1943	45.1943	27.165	-66.1043		control_fish04	_3	dead	47.33
control_fish09	_8	_5	38.862	18.932	19.93	-51.284	51.284	-51.1609			control_fish07	_6	_8	40.12	6.17	33.95	-84.6211	84.6211	25.94	-72.5161		control_fish05	_4	_	59.9	9.94	49.96	45.855	-83.4057	83.4057	-86.9456
control_fish10											control_fish08	_7	_2	32.22	16.62	15.6	-48.4171	48.4171	12.81	-48.0771		control_fish06	_5	-4	60.75	9.21	51.54	44.185	-84.8395	84.8395	-69.7012
control_fish01	_	_3	61.446	5.103	56.343	-91.6951	91.6951				control_fish09	_8	_	45.88	22.94	22.94	-50	50	20.845	-48.6265		control_fish07	_6	_3	71.71	29.47	42.24	47.065	-58.9039	58.9039	-73.2114
control_fish02	_1	_8	41.511	3.713	37.798	-91.0554	91.0554				control_fish10	_9	_1	37.1	9.26	27.84	-75.0404	75.0404	26.32	-65.1618		control_fish08	_7	_1	68.88	20.67	48.21	61.47	-69.9913	69.9913	-80.0517
control_fish03	_2	_7	46.604	13.837	32.767	-70.3094	70.3094				control_fish01	_	_6	42.46	17.59	24.87	-58.5728	58.5728				control_fish09	_8	_2	43.04	10.67	32.37	33.09	-75.2091	75.2091	-70.4809
control_fish04	_3	_	45.641	2.767	42.874	-93.9375	93.9375				control_fish02	_1	_7	46.4	26.23	20.17	-43.4698	43.4698				control_fish10	_9	_1	71.91	41.58	30.33		-42.1777	42.1777
control_fish05	_4	_1	51.477	1.75	49.727	-96.6004	96.6004				control_fish03	_2	_5	36.95	18	18.95	-51.2855	51.2855				control_fish01	_	_6	68.17	38.42	29.75		-43.6409	43.6409
control_fish06	_5	_2	56.566	2.475	54.091	-95.6246	95.6246				control_fish04	_3	_9	30.44	14.93	15.51	-50.9527	50.9527				control_fish02	_1	_5	58.05	30.25	27.8		-47.8898	47.8898
control_fish07	_6	_4	45.942	32.676	13.266	-28.8755	28.8755				control_fish05	_4	_4	34.68	6.9	27.78	-80.1038	80.1038				control_fish03	_2	dead	79.87
control_fish08	_7	_6	52.581	28.492	24.089	-45.8131	45.8131				control_fish06	_5	_3	37.58	4.88	32.7	-87.0144	87.0144				control_fish04	_3	dead	70.39
control_fish09	_8	_5	51.119	25.029	26.09	-51.0378	51.0378				control_fish07	_6	_8	29.68	11.75	17.93	-60.4111	60.4111				control_fish05	_4	_	46.14	4.39	41.75		-90.4855	90.4855
control_fish10											control_fish08	_7	_2	20.99	10.97	10.02	-47.737	47.737				control_fish06	_5	-4	67.5	30.67	36.83		-54.563	54.563
											control_fish09	_8	_	39.68	20.93	18.75	-47.253	47.253				control_fish07	_6	_3	59.29	7.4	51.89		-87.519	87.519
CS_010											control_fish10	_9	_1	44.86	20.06	24.8	-55.2831	55.2831				control_fish08	_7	_1	82.93	8.2	74.73		-90.1121	90.1121
	0dpa	1dpa	distance 1st joint - gfp segment -1 (µm) 0dpa	distance 1st joint - gfp segment -1 (µm) 1dpa	D distance 1st joint 1 dpa	mean D distance 1st joint 1 dpa	% distance 1st joint change	migration (%)	mean % distance 1st joint change													control_fish09	_8	_2	51.42	17.61	33.81		-65.7526	65.7526
W54011_fish01	_	_6	60.4	42.47	17.93	23.415	-29.6854	29.6854	-35.661		CS_019											control_fish10	_9	_1	58.9	30.01	28.89		-49.0492	49.0492
W54011_fish02	_1	_	61.69	48.47	13.22	14.795	-21.4297	21.4297	-24.9052			0dpa	1dpa	distance 1st joint - gfp segment -1 (µm) 0dpa	distance 1st joint - gfp segment -1 (µm) 1dpa	D distance 1st joint	% distance 1st joint change	migration (%)	mean D distance 1st joint	mean % distance change
W54011_fish03	_2	_11	69.5	44.49	25.01	23.67	-35.9856	35.9856	-32.5742		PMX205_fish01	_	_4	45.91	32.7	13.21	-28.7737	28.7737	11.6825	-25.8252		CS_015
W54011_fish04	_3	_3	84.58	48.51	36.07	33.15	-42.646	42.646	-48.2708		PMX205_fish02	_1	_1	41.27	32.12	9.15	-22.1711	22.1711	6.685	-21.4592			0dpa	1dpa	distance 1st joint - gfp segment -1 (µm) 0dpa	distance 1st joint - gfp segment -1 (µm) 1dpa	D distance 1st joint	mean D distance 1st joint	% distance 1st joint change	migration (%)	mean % distance 1st joint change
W54011_fish05	_4	_9	45.17	37.68	7.49	8.685	-16.5818	16.5818	-18.9743		PMX205_fish03	_10	_9	46.42	35.77	10.65	-22.9427	22.9427	7.154	-18.1271		SB290157_fish01	_	_2	37.6	27.26	10.34	12.1	-27.5	27.5	-31.5695
W54011_fish06	_5	_8	59.18	50.72	8.46	8.785	-14.2954	14.2954	-15.8338		PMX205_fish04	_2	_6	40.24	23.765	16.475	-40.9418	40.9418	9.53	-24.5316		SB290157_fish02	_1	_4	46.72	28.93	17.79	13.235	-38.0779	38.0779	-32.4796
W54011_fish07	_6	_7	53.47	49.23	4.24	5.29	-7.92968	7.92968	-8.44224		PMX205_fish05	_3	_	31.09	22.055	9.035	-29.0608	29.0608	11.1195	-30.4159		SB290157_fish03	_10	_6	41.59	34.85	6.74	16.725	-16.2058	16.2058	-33.43
W54011_fish08	_7	_1	91.18	38.02	53.16	39.175	-58.3023	58.3023	-48.1739		PMX205_fish06	_4	_8	24.58	15.402	9.178	-37.3393	37.3393	8.4365	-28.6476		SB290157_fish04	_2	_9	59.09	32.31	26.78	17.65	-45.3207	45.3207	-35.4917
W54011_fish09	_8	_2	58.52	44.44	14.08	8.61	-24.0602	24.0602	-14.8088		PMX205_fish07	_5	_2	41.09	32.09	9	-21.9031	21.9031	7.867	-21.4702		SB290157_fish05	_3	_	56.13	34.74	21.39	20.375	-38.108	38.108	-40.3287
W54011_fish10	_9	_5	67.54	49.93	17.61	12.5	-26.0734	26.0734	-19.6373		PMX205_fish08	_6	_7	51.43	32.849	18.581	-36.1287	36.1287	9.6195	-18.866		SB290157_fish06	_4	_3	29.98	28.49	1.49	13.25	-4.96998	4.96998	-25.2586
W54011_fish11	_10	_10	53.18	29.79	23.39	24.085	-43.9827	43.9827	-49.6291		PMX205_fish09	_8	_3	34.26	26.31	7.95	-23.2049	23.2049	9.306	-25.964		SB290157_fish07	_5	_1	39.34	35.98	3.36	9.215	-8.54093	8.54093	-22.5062
W54011_fish12	_11	_4	56.66	33.46	23.2	29.165	-40.946	40.946	-43.6031		PMX205_fish10	_9	_5	42.16	28.341	13.819	-32.7775	32.7775	9.812	-23.4285		SB290157_fish08	_6	_7	31.15	18.39	12.76	10.305	-40.9631	40.9631	-27.9223
W54011_fish01	_	_6	69.41	40.51	28.9		-41.6367	41.6367			PMX205_fish01	_	_4	44.39	34.235	10.155	-22.8768	22.8768				SB290157_fish09	_7	_5	34.65	23.12	11.53	14.13	-33.2756	33.2756	-41.0754
W54011_fish02	_1	_	57.68	41.31	16.37		-28.3807	28.3807			PMX205_fish02	_1	_1	20.34	16.12	4.22	-20.7473	20.7473				SB290157_fish10	_8	_8	40.93	33.32	7.61	14.99	-18.5927	18.5927	-29.266
W54011_fish03	_2	_11	76.57	54.24	22.33		-29.1629	29.1629			PMX205_fish03	_10	_9	27.48	23.822	3.658	-13.3115	13.3115				SB290157_fish11	_9	_10	32.36	19.01	13.35	17.765	-41.2546	41.2546	-39.6823
W54011_fish04	_3	_3	56.09	25.86	30.23		-53.8955	53.8955			PMX205_fish04	_2	_6	31.83	29.245	2.585	-8.12127	8.12127				SB290157_fish01	_	_2	38.89	25.03	13.86		-35.639	35.639
W54011_fish05	_4	_9	46.24	36.36	9.88		-21.3668	21.3668			PMX205_fish05	_3	_	41.56	28.356	13.204	-31.7709	31.7709				SB290157_fish02	_1	_4	32.29	23.61	8.68		-26.8814	26.8814
W54011_fish06	_5	_8	52.44	43.33	9.11		-17.3722	17.3722			PMX205_fish06	_4	_8	38.56	30.865	7.695	-19.9559	19.9559				SB290157_fish03	_10	_6	52.73	26.02	26.71		-50.6543	50.6543
W54011_fish07	_6	_7	70.8	64.46	6.34		-8.9548	8.9548			PMX205_fish07	_5	_2	32.01	25.276	6.734	-21.0372	21.0372				SB290157_fish04	_2	_9	33.2	24.68	8.52		-25.6627	25.6627
W54011_fish08	_7	_1	66.21	41.02	25.19		-38.0456	38.0456			PMX205_fish08	_6	_7	41.04	40.382	0.658	-1.60331	1.60331				SB290157_fish05	_3	_	45.5	26.14	19.36		-42.5495	42.5495
W54011_fish09	_8	_2	56.5	53.36	3.14		-5.55752	5.55752			PMX205_fish09	_8	_3	37.12	26.458	10.662	-28.7231	28.7231				SB290157_fish06	_4	_3	54.91	29.9	25.01		-45.5473	45.5473
W54011_fish10	_9	_5	55.98	48.59	7.39		-13.2011	13.2011			PMX205_fish10	_9	_5	41.23	35.425	5.805	-14.0796	14.0796				SB290157_fish07	_5	_1	41.32	26.25	15.07		-36.4714	36.4714
W54011_fish11	_10	_10	44.83	20.05	24.78		-55.2755	55.2755														SB290157_fish08	_6	_7	52.75	44.9	7.85		-14.8815	14.8815
W54011_fish12	_11	_4	75.94	40.81	35.13		-46.2602	46.2602			control_fish01	_	_3	46.65	21.261	25.389	-54.4244	54.4244	25.406	-73.4695		SB290157_fish09	_7	_5	34.23	17.5	16.73		-48.8753	48.8753
											control_fish02	_1	_5	39.63	8.396	31.234	-78.814	78.814	28.4415	-70.5118		SB290157_fish10	_8	_8	56.01	33.64	22.37		-39.9393	39.9393
control_fish01	_	_2	65.7	31.03	34.67	32.655	-52.7702	52.7702	-56.9578		control_fish03	_2	_9	40.68	19.88	20.8	-51.1308	51.1308	20.536	-54.8771		SB290157_fish11	_9	_10	58.2	36.02	22.18		-38.11	38.11
control_fish02	_1	_	64.52	27.12	37.4	44.325	-57.9665	57.9665	-60.6034		control_fish04	_3	_1	24.58	9.756	14.824	-60.3092	60.3092	21.6145	-67.877
control_fish03	_2	_11	88.86	29.58	59.28	42.905	-66.7117	66.7117	-65.4667		control_fish05	_4	_8	35.88	13.607	22.273	-62.0764	62.0764	26.947	-76.7597		control_fish01	_	_	41.24	6.04	35.2	29.515	-85.354	85.354	-72.2135
control_fish04	_3	_10	53.86	23.78	30.08	36.005	-55.8485	55.8485	-62.6345		control_fish06	_5	_	43.03	21.77	21.26	-49.4074	49.4074	25.0165	-71.3677		control_fish02	_1	_8	59.17	25.45	33.72	32.08	-56.9883	56.9883	-57.5566
control_fish05	_4	_1	71.07	14.78	56.29	55.56	-79.2036	79.2036	-78.2744		control_fish07	_6	_2	31.43	9.524	21.906	-69.6977	69.6977	25.41	-75.3674		control_fish03	_2	_3	42.81	14.26	28.55	26.425	-66.69	66.69	-60.1189
control_fish06	_5	_3	61.41	25.86	35.55	33.965	-57.8896	57.8896	-64.1558		control_fish08	_7	_4	56.42	28.908	27.512	-48.7629	48.7629	22.533	-49.3232		control_fish04	_3	_1	63.42	13.61	49.81	41.575	-78.5399	78.5399	-79.3036
control_fish07	_6	_9	73.2	36.74	36.46	43.68	-49.8087	49.8087	-72.3415		control_fish09	_8	_7	43.57	19.429	24.141	-55.4074	55.4074	23.4975	-59.5515		control_fish05	_4	_5	41.13	10.54	30.59	36.515	-74.3739	74.3739	-80.8226
control_fish08	_7	_7	60.93	12.13	48.8	38.805	-80.0919	80.0919	-70.3276		control_fish10	_9	_6	34.83	13.213	21.617	-62.0643	62.0643	24.902	-60.8407		control_fish06	_5	_6	37.09	9.43	27.66	34.365	-74.5754	74.5754	-75.535
control_fish09	_8	_6	52.25	28.02	24.23	29.78	-46.3732	46.3732	-54.9353		control_fish01	_	_3	27.48	2.057	25.423	-92.5146	92.5146				control_fish07	_6	_7	28.2	11.04	17.16	27.16	-60.8511	60.8511	-66.3984
control_fish10	_9	_8	51.86	23.46	28.4	46.075	-54.7628	54.7628	-75.5237		control_fish02	_1	_5	41.23	15.581	25.649	-62.2096	62.2096				control_fish08	_7	_2	44.76	27.03	17.73	21.255	-39.6113	39.6113	-52.4969
control_fish11	_10	_5	56.18	22.71	33.47	34.665	-59.5764	59.5764	-63.1215		control_fish03	_2	_9	34.58	14.308	20.272	-58.6235	58.6235				control_fish09	_8	_4	40.12	19.57	20.55	38.115	-51.2213	51.2213	-68.8204
control_fish12	_11	_4	56.27	18.64	37.63	35.125	-66.874	66.874	-66.6888		control_fish04	_3	_1	37.65	9.245	28.405	-75.4449	75.4449				control_fish10	_9	_9	40.59	23.25	17.34	8.67	-42.7199	42.7199	-21.3599
control_fish01	_	_2	50.11	19.47	30.64		-61.1455	61.1455			control_fish05	_4	_8	34.58	2.959	31.621	-91.443	91.443				control_fish01	_	_	42.15	19.99	22.16		-52.5741	52.5741
control_fish02	_1	_	81.04	29.79	51.25		-63.2404	63.2404			control_fish06	_5	_	30.83	2.057	28.773	-93.3279	93.3279				control_fish02	_1	_8	40.34	16.51	23.83		-59.0729	59.0729
control_fish03	_2	_11	41.31	14.78	26.53		-64.2217	64.2217			control_fish07	_6	_2	35.68	6.766	28.914	-81.037	81.037				control_fish03	_2	_3	52.37	21.93	30.44		-58.1249	58.1249
control_fish04	_3	_10	60.4	18.47	41.93		-69.4205	69.4205			control_fish08	_7	_4	35.19	17.636	17.554	-49.8835	49.8835				control_fish04	_3	_1	45.38	21.08	24.3		-53.5478	53.5478
control_fish05	_4	_1	70.89	16.06	54.83		-77.3452	77.3452			control_fish09	_8	_7	35.88	13.026	22.854	-63.6957	63.6957				control_fish05	_4	_5	41.64	8.3	33.34		-80.0672	80.0672
control_fish06	_5	_3	45.98	13.6	32.38		-70.4219	70.4219			control_fish10	_9	_6	47.28	19.093	28.187	-59.6172	59.6172				control_fish06	_5	_6	48.63	6.19	42.44		-87.2712	87.2712
control_fish07	_6	_9	53.65	2.75	50.9		-94.8742	94.8742														control_fish07	_6	_7	53.69	12.62	41.07		-76.4947	76.4947
control_fish08	_7	_7	47.57	18.76	28.81		-60.5634	60.5634														control_fish08	_7	_2	51.65	14.49	37.16		-71.9458	71.9458
control_fish09	_8	_6	55.64	20.31	35.33		-63.4975	63.4975														control_fish09	_8	_4	37.9	13.12	24.78		-65.3826	65.3826
control_fish10	_9	_8	66.21	2.46	63.75		-96.2845	96.2845														control_fish10	_9	_9	64.43	8.75	55.68		-86.4194	86.4194
control_fish11	_10	_5	53.79	17.93	35.86		-66.6667	66.6667
control_fish12	_11	_4	49.05	16.43	32.62		-66.5036	66.5036

## Sheet: Fig 5F
mean bglap intensity
DMSO	fin01	mean	fin02	mean	fin03	mean	fin04	mean	fin05	mean	fin06	mean	fin07	mean	fin08	mean	fin09	mean	fin10	mean	fin11	mean	fin12	mean
	seg -1	56.3858	seg -1	67.7042	seg -1	32.5662	seg -1	39.0674	seg -1	26.5912	seg -1	43.17	seg -1	98.0424	seg -1	38.6678	seg -1	44.8448	seg -1	51.9536	seg -1	74.0648	seg -1	101.217
	seg -2	90.6154	seg -2	127.338	seg -2	50.709	seg -2	57.484	seg -2	46.1662	seg -2	91.2224	seg -2	143.681	seg -2	64.4948	seg -2	66.6506	seg -2	73.316	seg -2	113.644	seg -2	165.186
PMX205	fin01	mean	fin02	mean	fin03	mean	fin04	mean	fin05	mean	fin06	mean	fin07	mean	fin08	mean	fin09	mean	fin10	mean	fin11	mean	fin12	mean
	seg -1	58.7584	seg -1	121.636	seg -1	208.518	seg -1	115.12	seg -1	105.738	seg -1	32.0176	seg -1	17.53	seg -1	15.1732	seg -1	13.6526	seg -1	88.5782	seg -1	53.283	seg -1	55.9528
	seg -2	174.15	seg -2	171.654	seg -2	303.937	seg -2	152.234	seg -2	158.089	seg -2	83.1904	seg -2	33.5176	seg -2	31.3824	seg -2	23.4784	seg -2	135.163	seg -2	70.8022	seg -2	73.993
SB290157	fin01	mean	fin02	mean	fin03	mean	fin04	mean	fin05	mean	fin06	mean	fin07	mean	fin08	mean	fin09	mean	fin10	mean	fin11	mean	fin12	mean
	seg -1	25.8816	seg -1	22.841	seg -1	23.0661	seg -1	87.6246	seg -1	66.3108	seg -1	21.363	seg -1	56.9859	seg -1	81.617	seg -1	51.4707	seg -1	41.9283	seg -1	89.8149	seg -1	79.177
	seg -2	72.1873	seg -2	51.967	seg -2	30.711	seg -2	105.637	seg -2	88.8008	seg -2	32.2065	seg -2	87.4297	seg -2	133.86	seg -2	65.5753	seg -2	55.3283	seg -2	182.38	seg -2	113.466
% segM1 of segM2
DMSO	fin01	mean	fin02	mean	fin03	mean	fin04	mean	fin05	mean	fin06	mean	fin07	mean	fin08	mean	fin09	mean	fin10	mean	fin11	mean	fin12	mean
	seg -1	62.2254	seg -1	53.1687	seg -1	64.2217	seg -1	67.9622	seg -1	57.5988	seg -1	47.3239	seg -1	68.2363	seg -1	59.9549	seg -1	67.2834	seg -1	70.8626	seg -1	65.1729	seg -1	61.2747
	seg -2	100	seg -2	100	seg -2	100	seg -2	100	seg -2	100	seg -2	100	seg -2	100	seg -2	100	seg -2	100	seg -2	100	seg -2	100	seg -2	100
PMX205	fin01	mean	fin02	mean	fin03	mean	fin04	mean	fin05	mean	fin06	mean	fin07	mean	fin08	mean	fin09	mean	fin10	mean	fin11	mean	fin12	mean
	seg -1	33.7402	seg -1	70.8607	seg -1	68.6058	seg -1	75.62	seg -1	66.8851	seg -1	38.4871	seg -1	52.3009	seg -1	48.3494	seg -1	58.1496	seg -1	65.5343	seg -1	75.2561	seg -1	75.619
	seg -2	100	seg -2	100	seg -2	100	seg -2	100	seg -2	100	seg -2	100	seg -2	100	seg -2	100	seg -2	100	seg -2	100	seg -2	100	seg -2	100
SB290157	fin01	mean	fin02	mean	fin03	mean	fin04	mean	fin05	mean	fin06	mean	fin07	mean	fin08	mean	fin09	mean	fin10	mean	fin11	mean	fin12	mean
	seg -1	35.8534	seg -1	43.9529	seg -1	75.1071	seg -1	82.9486	seg -1	74.6737	seg -1	66.3313	seg -1	65.1791	seg -1	60.9717	seg -1	78.4909	seg -1	75.781	seg -1	49.246	seg -1	69.7806
	seg -2	100	seg -2	100	seg -2	100	seg -2	100	seg -2	100	seg -2	100	seg -2	100	seg -2	100	seg -2	100	seg -2	100	seg -2	100	seg -2	100

## Sheet: Fig 5 supp 1B
Well	Fluor	Content	Sample	Cq	Cq Mean	Amplification factor	Efficiency	Eamp corrected Cq
A01	SYBR	Unkn-01	actinb-TG1-GFP+	18.83	18.8	1.96	0.964	18.252
A02	SYBR	Unkn-01	actinb-TG1-GFP+	18.76	18.8	1.96	0.964					DeltaCT GOI vs reference							GFP+_bact2	GFP-_bact2	GFP+_hatn10	GFP-_hatn10	Mean reference genes-GFP+	Mean reference genes-GFP-
B01	SYBR	Unkn-02	actinb-TG1-GFP-	20.15	20.15	1.96	0.964	19.5627				GFP+_c5	GFP-_c5	GFP+_c3aR1	GFP-_c3aR1	GFP+_c3a.1	GFP-_c3a.1		18.252	19.5627	24.5012	23.1418	21.3766	21.3523
B02	SYBR	Unkn-02	actinb-TG1-GFP-	20.14	20.15	1.96	0.964							9.31977	9.1158	12.0155	13.7969		18.0773	19.2617	23.6984	23.5593	20.8879	21.4105
C01	SYBR	Unkn-03	actinb-TG2-GFP+	18.63	18.62	1.96	0.964	18.0773						8.8952	8.54132	13.9446	12.4924		20.1549	19.9802	25.775	23.0776	22.9649	21.5289
C02	SYBR	Unkn-03	actinb-TG2-GFP+	18.62	18.62	1.96	0.964							9.10147	7.58902	13.982	14.2025		18.6404	20.9899	24.1052	24.833	21.3728	22.9114
D01	SYBR	Unkn-04	actinb-TG2-GFP-	19.88	19.84	1.96	0.964	19.2617						9.4229	8.40047	12.7855	11.5839
D02	SYBR	Unkn-04	actinb-TG2-GFP-	19.8	19.84	1.96	0.964						#DIV/0!		8.41165		13.0189
E01	SYBR	Unkn-05	actinb-TG3-GFP+	20.63	20.76	1.96	0.964	20.1549
E02	SYBR	Unkn-05	actinb-TG3-GFP+	20.89	20.76	1.96	0.964					DeltaDeltaCt GOI rel, to control
F01	SYBR	Unkn-06	actinb-TG3-GFP-	20.71	20.58	1.96	0.964	19.9802				GFP+_c5	GFP-_c5	GFP+_c3aR1	GFP-_c3aR1	GFP+_c3a.1	GFP-_c3a.1
F02	SYBR	Unkn-06	actinb-TG3-GFP-	20.44	20.58	1.96	0.964							0.908116	0.70415	-1.00338	0.77794
G01	SYBR	Unkn-07	bact2-TG4-GFP+	19.33	19.2	1.96	0.964	18.6404						0.483542	0.129667	0.925683	-0.526509
G02	SYBR	Unkn-07	bact2-TG4-GFP+	19.08	19.2	1.96	0.964							0.689818	-0.822636	0.963055	1.18356
H01	SYBR	Unkn-08	bact2-TG4-GFP-	21.64	21.62	1.96	0.964	20.9899						1.01124	-0.0111814	-0.233415	-1.43499
H02	SYBR	Unkn-08	bact2-TG4-GFP-	21.61	21.62	1.96	0.964
A03	SYBR	Unkn-07	hatn10-TG1-GFP+	22.85	22.89	2.1	1.101	24.5012				2^-(∆∆Ct)
A04	SYBR	Unkn-07	hatn10-TG1-GFP+	22.94	22.89	2.1	1.101					GFP+_c5	GFP-_c5	GFP+_c3aR1	GFP-_c3aR1	GFP+_c3a.1	GFP-_c3a.1
B03	SYBR	Unkn-08	hatn10-TG1-GFP-	21.62	21.62	2.1	1.101	23.1418						0.53288	0.613804	2.00469	0.583199
B04	SYBR	Unkn-08	hatn10-TG1-GFP-	21.63	21.62	2.1	1.101							0.715219	0.914042	0.526431	1.44044
C03	SYBR	Unkn-09	hatn10-TG2-GFP+	22.21	22.14	2.1	1.101	23.6984						0.619932	1.76864	0.51297	0.440263
C04	SYBR	Unkn-09	hatn10-TG2-GFP+	22.08	22.14	2.1	1.101							0.496118	1.00778	1.17561	2.70381
D03	SYBR	Unkn-10	hatn10-TG2-GFP-	22.12	22.01	2.1	1.101	23.5593
D04	SYBR	Unkn-10	hatn10-TG2-GFP-	21.91	22.01	2.1	1.101					log2 2^-(∆∆Ct)
E03	SYBR	Unkn-11	hatn10-TG3-GFP+	24.21	24.08	2.1	1.101	25.775				GFP+_c5	GFP-_c5	GFP+_c3aR1	GFP-_c3aR1	GFP+_c3a.1	GFP-_c3a.1
E04	SYBR	Unkn-11	hatn10-TG3-GFP+	23.94	24.08	2.1	1.101							-0.908116	-0.70415	1.00338	-0.77794
F03	SYBR	Unkn-12	hatn10-TG3-GFP-	21.6	21.56	2.1	1.101	23.0776						-0.483542	-0.129667	-0.925683	0.526509
F04	SYBR	Unkn-12	hatn10-TG3-GFP-	21.52	21.56	2.1	1.101							-0.689818	0.822636	-0.963055	-1.18356
G03	SYBR	Unkn-15	hatn10-TG4-GFP+	22.52	22.52	2.1	1.101	24.1052						-1.01124	0.0111814	0.233415	1.43499
G04	SYBR	Unkn-15	hatn10-TG4-GFP+	22.51	22.52	2.1	1.101
H03	SYBR	Unkn-16	hatn10-TG4-GFP-	23.17	23.2	2.1	1.101	24.833
H04	SYBR	Unkn-16	hatn10-TG4-GFP-	23.23	23.2	2.1	1.101
A07	SYBR	Unkn-19	c3aR1-TG1-GFP+	31.03	30.92	1.99	0.995	30.6964
A08	SYBR	Unkn-19	c3aR1-TG1-GFP+	30.81	30.92	1.99	0.995
B07	SYBR	Unkn-20	c3aR1-TG1-GFP-	30.6	30.69	1.99	0.995	30.4681
B08	SYBR	Unkn-20	c3aR1-TG1-GFP-	30.78	30.69	1.99	0.995
C07	SYBR	Unkn-21	c3aR1-TG2-GFP+	29.73	30	1.99	0.995	29.7831
C08	SYBR	Unkn-21	c3aR1-TG2-GFP+	30.26	30	1.99	0.995
D07	SYBR	Unkn-22	c3aR1-TG2-GFP-	30.2	30.17	1.99	0.995	29.9518
D08	SYBR	Unkn-22	c3aR1-TG2-GFP-	30.14	30.17	1.99	0.995
E07	SYBR	Unkn-23	c3aR1-TG3-GFP+	32.08	32.3	1.99	0.995	32.0664
E08	SYBR	Unkn-23	c3aR1-TG3-GFP+	32.53	32.3	1.99	0.995
F07	SYBR	Unkn-24	c3aR1-TG3-GFP-	29.24	29.33	1.99	0.995	29.1179
F08	SYBR	Unkn-24	c3aR1-TG3-GFP-	29.41	29.33	1.99	0.995
G07	SYBR	Unkn-31	c3aR1-TG4-GFP+	31.3	31.02	1.99	0.995	30.7957
G08	SYBR	Unkn-31	c3aR1-TG4-GFP+	30.74	31.02	1.99	0.995
H07	SYBR	Unkn-32	c3aR1-TG4-GFP-	31.95	31.54	1.99	0.995	31.3119
H08	SYBR	Unkn-32	c3aR1-TG4-GFP-	31.12	31.54	1.99	0.995
A09	SYBR	Unkn-25	c3a.1-TG1-GFP+	32.43	32.69	2.03	1.0265	33.3922
A10	SYBR	Unkn-25	c3a.1-TG1-GFP+	32.96	32.69	2.03	1.0265
B09	SYBR	Unkn-26	c3a.1-TG1-GFP-	35.27	34.41	2.03	1.0265	35.1491
B10	SYBR	Unkn-26	c3a.1-TG1-GFP-	33.55	34.41	2.03	1.0265
C09	SYBR	Unkn-27	c3a.1-TG2-GFP+	34.7	34.1	2.03	1.0265	34.8325
C10	SYBR	Unkn-27	c3a.1-TG2-GFP+	33.5	34.1	2.03	1.0265
D09	SYBR	Unkn-28	c3a.1-TG2-GFP-	32.99	33.19	2.03	1.0265	33.9029
D10	SYBR	Unkn-28	c3a.1-TG2-GFP-	33.4	33.19	2.03	1.0265
E09	SYBR	Unkn-29	c3a.1-TG3-GFP+	36.58	36.17	2.03	1.0265	36.9469
E10	SYBR	Unkn-29	c3a.1-TG3-GFP+	35.76	36.17	2.03	1.0265
F09	SYBR	Unkn-30	c3a.1-TG3-GFP-	34.46	34.98	2.03	1.0265	35.7314
F10	SYBR	Unkn-30	c3a.1-TG3-GFP-	35.51	34.98	2.03	1.0265
G09	SYBR	Unkn-39	c3a.1-TG4-GFP+	33.61	33.44	2.03	1.0265	34.1583
G10	SYBR	Unkn-39	c3a.1-TG4-GFP+	33.27	33.44	2.03	1.0265
H09	SYBR	Unkn-40	c3a.1-TG4-GFP-	33.11	33.77	2.03	1.0265	34.4954
H10	SYBR	Unkn-40	c3a.1-TG4-GFP-	34.43	33.77	2.03	1.0265

## Sheet: Fig 5 suppl 2B
non-injured fin				segment -1 1 dpa					segment-1 2 dpa
source	GFP+ / EdU +		ray	GFP+	GFP+ EdU+	%		source	GFP+	GFP+ EdU+	% GFP+ / EdU+ cells
ray01_seg1	0		ray01	16	0	0		ray05	18	5	27.7778
ray01_seg2	0		ray02	16	0	0		ray04	23	5	21.7391
ray02_seg1	0		ray03	21	0	0		ray03	14	4	28.5714
ray02_seg2	0		ray04	32	1	3.125		ray02	22	4	18.1818
ray03_seg1	0		ray05	17	0	0		ray01	21	3	14.2857
ray03_seg2	0		ray06	17	0	0		ray13	7	2	28.5714
ray04_seg1	0		ray07	14	0	0		ray14	14	0	0
ray04_seg2	0		ray08	32	0	0		ray11	13	3	23.0769
ray05_seg1	0		ray09	27	0	0		ray12	15	3	20
ray05_seg2	0		ray10	33	0	0		ray10	16	4	25
ray06_seg1	0							ray09	28	4	14.2857
ray06_seg2	0							ray08	15	1	6.66667
ray07_seg1	0							ray07	21	1	4.7619
ray07_seg2	0							ray06	17	2	11.7647

## Sheet: Fig 5 suppl 2C
	segment 0				segment M1				segment M2
source	GFP+	GFP+ EdU+	% GFP+ / EdU+ cells	arcsin GFP + / EdU+ cells	GFP+	GFP+ EdU+	% GFP+ / EdU+ cells	arcsin GFP + / EdU+ cells	GFP+	GFP+ EdU+	% GFP+ / EdU+ cells	arcsin GFP + / EdU+ cells
ray05	5	0	0	0	18	5	27.7778	31.8061	22	0	0	0
ray04	11	2	18.1818	25.2394	23	5	21.7391	27.7913	34	0	0	0
ray03	6	2	33.3333	35.2644	14	4	28.5714	32.3115	32	0	0	0
ray02	8	2	25	30	22	4	18.1818	25.2394	27	0	0	0
ray01	8	3	37.5	37.7612	21	3	14.2857	22.2077	22	0	0	0
ray13	7	3	42.8571	40.8934	7	2	28.5714	32.3115	18	0	0	0
ray14	5	1	20	26.5651	14	0	0	0	16	0	0	0
ray11	8	3	37.5	37.7612	13	3	23.0769	28.7105	24	0	0	0
ray12	13	1	7.69231	16.1021	15	3	20	26.5651	20	1	5	12.921
ray10	12	3	25	30	16	4	25	30	22	0	0	0
ray09	9	1	11.1111	19.4712	28	4	14.2857	22.2077	23	0	0	0
ray08	9	2	22.2222	28.1255	15	1	6.66667	14.9632	27	0	0	0
ray07	14	5	35.7143	36.6992	21	1	4.7619	12.6044	16	0	0	0
ray06	12	3	25	30	17	2	11.7647	20.0596	32	0	0	0
Average	9.07143	2.21429	24.3652	28.1345	17.4286	2.92857	17.4774	23.3413	23.9286	0.0714286	0.357143	0.922926

## Sheet: Fig 5 suppl 2D
	segM1
	total bglp+ analysed	intensity total number			intensity %			total EdU+	EdU +			EdU + %
source		low	medium	strong	low	medium	strong		low	medium	strong	low	medium	strong
ray12	47	25	12	10	53.1915	25.5319	21.2766	3	2	1	0	66.6667	33.3333	0
ray11	77	42	22	13	54.5455	28.5714	16.8831	6	5	1	0	83.3333	16.6667	0
ray10	80	41	21	18	51.25	26.25	22.5	3	2	1	0	66.6667	33.3333	0
ray9	62	40	14	8	64.5161	22.5806	12.9032	6	2	2	2	33.3333	33.3333	33.3333
ray8	66	40	15	11	60.6061	22.7273	16.6667	5	1	4	0	20	80	0
ray7	58	38	14	6	65.5172	24.1379	10.3448	5	2	3	0	40	60	0
ray6	81	60	17	4	74.0741	20.9877	4.93827	4	1	3	0	25	75	0
ray5	63	45	12	6	71.4286	19.0476	9.52381	6	3	3	0	50	50	0
ray4	92	53	30	9	57.6087	32.6087	9.78261	9	8	1	0	88.8889	11.1111	0
ray3	32	26	5	1	81.25	15.625	3.125	5	4	1	0	80	20	0
ray2	49	32	15	2	65.3061	30.6122	4.08163	6	2	4	0	33.3333	66.6667	0
ray1	63	42	17	4	66.6667	26.9841	6.34921	4	3	1	0	75	25	0
Average	64.1667	40.3333	16.1667	7.66667	63.83	24.6387	11.5312	5.16667	2.91667	2.08333	0.166667	55.1852	42.037	2.77778
sum	770	484	194	92	765.961	295.665	138.375	62	35	25	2	662.222	504.444	33.3333

## Sheet: Fig 5 suppl 3A
series	GFP+	EdU+/GFP+	% EdU+ of GFP+		arcsin of percentage
control_001	10	1	10		control_001	18.4349
control_002	13	2	15.3846		control_002	23.0935
control_003	20	3	15		control_003	22.7865
control_004	34	3	8.82353		control_004	17.2802
control_005	14	3	21.4286		control_005	27.575
control_006	28	5	17.8571		control_006	24.9974
control_007	27	9	33.3333		control_007	35.2644
control_008	4	1	25		control_008	30
control_009	5	1	20		control_009	26.5651
control_010	11	2	18.1818		control_010	25.2394
PMX-205_001	10	2	20		PMX-205_001	26.5651
PMX-205_002	11	1	9.09091		PMX-205_002	17.5484
PMX-205_003	30	4	13.3333		PMX-205_003	21.4167
PMX-205_004	10	4	40		PMX-205_004	39.2315
PMX-205_005	3	1	33.3333		PMX-205_005	35.2644
PMX-205_006	7	1	14.2857		PMX-205_006	22.2077
PMX-205_007	13	3	23.0769		PMX-205_007	28.7105
PMX-205_008	31	9	29.0323		PMX-205_008	32.6031
PMX-205_009	10	1	10		PMX-205_009	18.4349
PMX-205_010	10	2	20		PMX-205_010	26.5651

[truncated: 3 more sheets: Fig 5 suppl 3B, Fig 5 suppl 3C, effect size]
