# Supplementary material for: Zebrafish fin regeneration involves generic and regeneration-specific osteoblast injury responses
Source: eLife. 2022 Jun 24;11:e77614. doi: 10.7554/eLife.77614 (PMC9259016; doi:10.7554/eLife.77614)
Supplement: Figure 6—source data 1. [file elife-77614-fig6-data1.xlsx]

## Sheet: Fig 6C
HR_048				HR_034
name	Runx2+ prox	Runx2+ dist		name	Runx2+ prox	Runx2+ dist	name
centre01	8	55		ray01_centre_dist	2	32	ray01_centre_prox
centre02	0	52		ray02_centre_dist	0	49	ray02_centre_prox
centre03				ray03_centre_dist	11	81	ray03_centre_prox
centre04	11	78		ray04_centre_dist	8	73	ray04_centre_prox
centre05	1	45		ray05_centre_dist	0	8	ray05_centre_prox
centre06	0	46
centre07	0	34
centre08	0	36
centre09	4	20
centre10	1	13
centre11	5	24

## Sheet: Fig 6D
	Osx+ proximal	Osx+ distal
HR_048	0	19
	0	12
HR_034	1	26
	0	52
	14	121
	11	111
	0	11
HR_058	4	51
HR_059	0	31
	1	66
	6	45
	2	56
HR_060	2	33
	1	20
	0	15

## Sheet: Fig 6F
2 dpi														3 dpi
Zns5+ EdU+ cell position, sorted by x-value; centre segment SCALED														sorted by x-value; SCALED; 0 = proximal, 1 = distal
centre02	centre03	centre04	centre05	centre06	centre07	centre08	centre09	centre10	series003	series010	series016	series033		centre01	centre02	centre03	centre04	centre06	centre08	centre10	centre11	centre12	centre13	centre14	centre15	centre16	centre17	centre18	centre19	centre20		random numbers
0	0	0	0	0	0	0	0	0	0	0	0	0		0	0	0	0	0	0	0	0	0	0	0	0	0	0	0	0	0		0.460359	0.0274745	0.632199	0.416077	0.303758	0.712267	0.816118	0.81617	0.965239	0.0353302	0.546772	0.814264
0.097222	0.112644	0.006088	0.039542	0.059558	0.074561	0.023678	0.013048	0.032232	0.0162907	0.0261593	0.0465116	0.0580111		0.0247839	0.026253	0.00990099	0.102994	0	0.0608899	0.329184	0.18018	0.0157143	0.153707	0.0395062	0.0149626	0.0183299	0.038914	0.00132275	0.00310078	0.051168		0.906577	0.656239	0.513127	0.383224	0.0368962	0.611916	0.195423	0.442856	0.905306	0.612158	0.867224	0.663192
0.179688	0.248276	0.050989	0.068195	0.063401	0.114035	0.044988	0.044734	0.156326	0.229323	0.058264	0.0993658	0.121547		0.0299712	0.0628481	0.19802	0.311377	0.0268129	0.232436	0.392808	0.288288	0.0314286	0.244123	0.180247	0.0723192	0.0295316	0.133032	0.0185185	0.0744186	0.0978865		0.550896	0.101184	0.0929289	0.176099	0.346614	0.332638	0.658944	0.956738	0.204139	0.31608	0.176927	0.356628
0.184028	0.264943	0.057839	0.073352	0.092219	0.152961	0.065509	0.087605	0.275584	0.33584	0.181926	0.131078	0.179558		0.0668588	0.0898966	0.270627	0.504192	0.07922	0.241803	0.705394	0.331081	0.0585714	0.45208	0.25679	0.0935162	0.0610998	0.179186	0.0330688	0.134884	0.12792		0.589089	0.123972	0.425259	0.327846	0.277433	0.789599	0.0560004	0.226888	0.635321	0.854543	0.588071	0.34383
0.188368	0.31092	0.098935	0.089398	0.112392	0.158991	0.123125	0.141659	0.32635	0.568922	0.21522	0.150106	0.187845		0.0708934	0.178202	0.693069	0.517365	0.0938452	0.255269	0.789765	1	0.0757143	0.529837	0.354321	0.142145	0.108961	0.213575	0.042328	0.347287	0.271413		0.77918	0.171982	0.21513	0.365452	0.898473	0.0731259	0.0667839	0.409097	0.681382	0.0922764	0.763718	0.116968
0.225694	0.335057	0.133942	0.089971	0.151777	0.164474	0.188635	0.150047	0.390814	0.622807	0.293698	0.20296	0.240331		0.0824207	0.191726	0.69637	0.531737	0.120049	0.314988	1		0.147143	0.562387	0.377778	0.199501	0.153768	0.290498	0.108466	0.426357	0.278087		0.357892	0.592304	0.218996	0.361971	0.562326	0.971472	0.773401	0.75992	0.251334	0.733372	0.947287	0.252188
0.230035	0.344828	0.159817	0.101433	0.157541	0.236294	0.19337	0.169618	0.451249	0.640351	0.313912	0.232558	0.259669		0.0876081	0.204455	0.80198	0.594012	0.164534	0.321429			0.215714	0.64557	0.474074	0.214464	0.374745	0.422624	0.149471	0.444961	0.324805		0.483491	0.985996	0.681594	0.659557	0.568672	0.672945	0.0360561	0.600519	0.564189	0.588551	0.552648	0.489146
0.289063	0.351149	0.200913	0.105444	0.175793	0.253838	0.197316	0.228332	0.545528	0.858396	0.378121	0.250529	0.312155		0.106052	0.207637	0.844884	0.651497	0.212675	0.324356			0.568571	0.654611	0.479012	0.223192	0.39613	0.628959	0.171958	0.537984	0.397108		0.644456	0.378909	0.219177	0.032804	0.102846	0.51112	0.185786	0.821645	0.247097	0.699424	0.66118	0.878834
0.289063	0.432759	0.208524	0.122063	0.18732	0.259868	0.216259	0.280522	0.576954	1	0.43044	0.2537	0.350829		0.11585	0.222753	0.867987	0.670659	0.274223	0.337822			0.572857	0.725136	0.504938	0.233167	0.407332	0.703167	0.185185	0.578295	0.453838		0.472281	0.126954	0.343126	0.40091	0.194337	0.886969	0.560389	0.0522913	0.862779	0.856962	0.361224	0.702031
0.304688	0.464368	0.221461	0.131232	0.191162	0.280154	0.221784	0.281454	0.588235		0.445898	0.270613	0.571823		0.126225	0.247414	1	0.699401	0.358318	0.342506			0.697143	0.826401	0.532099	0.236908	0.53666	0.743891	0.222222	0.629457	0.502781		0.00360302	0.637333	0.511571	0.714256	0.302404	0.966621	0.690668	0.209918	0.643037	0.284831	0.875761	0.640293
0.349826	0.478736	0.249619	0.162751	0.193084	0.287281	0.235201	0.310345	0.661563		0.489893	0.366808	0.610497		0.157349	0.267303		0.728144	0.432663	0.411007			0.697143	0.882459	0.853086	0.275561	0.570265	0.882353	0.231481	0.652713	0.569522		0.419479	0.252505	0.599505	0.212912	0.789109	0.375109	0.647609	0.508144	0.21274	0.630396	0.671535	0.134061
0.358507	0.49023	0.321918	0.167335	0.248799	0.292763	0.239937	0.326188	0.66801		0.550535	0.410148	0.643646		0.200576	0.333333		0.764072	0.510664	0.448478			0.815714	0.889693	0.961728	0.340399	0.58554	0.947511	0.328042	0.803101	0.609566		0.814057	0.744172	0.526361	0.696223	0.923337	0.333065	0.378935	0.0147194	0.999944	0.913357	0.358885	0.0364168
0.396701	0.528736	0.368341	0.218338	0.253602	0.314693	0.243883	0.354147	0.677679		0.608799	0.445032	0.787293		0.246686	0.344471		0.796407	0.526508	0.471311			0.914286	0.929476	1	0.361596	0.625255	0.969231	0.334656	0.858915	0.641824		0.0733982	0.20598	0.697175	0.166571	0.613365	0.921294	0.740664	0.633635	0.35019	0.410271	0.627205	0.0315375
0.447049	0.538506	0.380518	0.23553	0.258405	0.326754	0.243883	0.603914	0.68332		0.668252	0.557082	0.81768		0.28415	0.363564		0.816766	0.631322	0.504098			1	1		0.46384	0.641548	0.99638	0.353175	0.87907	0.644049		0.489991	0.603872	0.871252	0.495857	0.534494	0.0160718	0.753226	0.484836	0.603156	0.864842	0.136505	0.843535
0.527778	0.549425	0.380518	0.245272	0.350624	0.352522	0.252565	0.623486	0.725222		0.737218	0.58351	0.828729		0.285879	0.377088		0.835928	0.846435	0.51171						0.490025	0.653768	1	0.412698	0.88062	0.746385		0.615258	0.858331	0.856751	0.0182539	0.55952	0.92906	0.592247	0.766728	0.359786	0.560086	0.10745	0.310705
0.565972	0.577011	0.422374	0.245272	0.358309	0.375	0.259669	0.630009	0.849315		0.751486	0.603594	0.839779		0.287608	0.396181		0.851497	0.927483	0.553864						0.501247	0.719959		0.416667	0.92093	0.761958		0.00754023	0.17871	0.391058	0.0504506	0.384547	0.195416	0.835628	0.482671	0.0670214	0.479779	0.676828	0.125742
0.608507	0.594828	0.46347	0.268768	0.384246	0.379386	0.273086	0.66822	0.867043		0.839477	0.604651	0.853591		0.302017	0.42323		0.876647	1	0.557963						0.514963	0.744399		0.60582	0.924031	0.785317		0.00855393	0.723938	0.0261564	0.10205	0.66997	0.944332	0.985985	0.79807	0.445677	0.439334	0.810799	0.766815
0.615451	0.645977	0.493912	0.274499	0.403458	0.401316	0.314128	0.739049	0.883965		0.848989	0.61945	0.872928		0.325072	0.450278		0.894611		0.593677						0.582294	0.757637		0.640212	0.95969	0.827586		0.714008	0.15395	0.923101	0.507652	0.444292	0.200599	0.111899	0.279847	0.384755	0.339636	0.212563	0.362553
0.694444	0.655172	0.496956	0.287106	0.420749	0.416118	0.349645	0.78658	0.920226		0.958383	0.671247	0.88674		0.368876	0.504375		0.949701		0.604215						0.594763	0.885947		0.690476	1	0.867631		0.830988	0.369368	0.186934	0.678571	0.888996	0.593123	0.151731	0.395184	0.990689	0.675981	0.0585023	0.483542
0.698785	0.684483	0.535769	0.310029	0.422671	0.542763	0.415943	0.873253	1		0.965517	0.770613	0.922652		0.382709	0.523469		0.962874		0.611827						0.604738	0.942974		0.703704		0.975528		0.959476	0.273646	0.0742786	0.433803	0.745713	0.230188	0.236886	0.481899	0.349724	0.0111971	0.749096	0.640854
0.726563	0.724138	0.678082	0.345559	0.494717	0.593202	0.455406	0.904007			0.969084	0.821353	0.933702		0.386744	0.587112		0.977246		0.65808						0.693267	0.961303		0.747354		1		0.159045	0.780148	0.980666	0.853928	0.478399	0.313833	0.429791	0.205383	0.674677	0.445601	0.498994	0.152044
0.736979	0.735057	0.712329	0.37765	0.497598	0.653509	0.459353	0.921715			0.973841	0.853066	1		0.400576	0.595863		0.984431		0.686768						0.71197	1		0.842593				0.658312	0.479223	0.877981	0.638258	0.81003	0.408933	0.663153	0.748654	0.919103	0.83985	0.947854	0.492599
0.75	0.735632	0.717656	0.403438	0.504323	0.662281	0.629834	0.956198			0.978597	0.882664			0.416715	0.638823		0.998802		0.726581						0.750623			0.878307				0.491427	0.442181	0.971173	0.788244	0.539841	0.851773	0.79488	0.715016	0.4009	0.938871	0.139486	0.410211
0.789063	0.754598	0.770928	0.414327	0.557157	0.669956	0.631413	0.962721			0.983353	0.886892			0.430548	0.740652		1		0.799766						0.750623			0.899471				0.531162	0.121055	0.90445	0.991687	0.630393	0.2071	0.83453	0.660152	0.722148	0.478142	0.958775	0.820661
0.988715	0.758621	0.812785	0.417765	0.635927	0.719298	0.650355	1			1	0.895349			0.4317	0.963405				0.91452						0.766833			1				0.100328	0.185623	0.192666	0.274566	0.459437	0.288171	0.237468	0.226498	0.580445	0.701559	0.0795446	0.987146
1	0.770115	0.842466	0.428653	0.643612	0.72807	0.651934					0.899577			0.432853	1				0.916276						0.819202							0.811048	0.623279	0.525639	0.783276	0.957562	0.557224	0.339345	0.467674	0.232989	0.070042	0.620831	0.0132072
	0.80977	0.960426	0.431519	0.67147	0.75	0.662194					0.917548			0.502017					1						0.837905							0.677155	0.688802	0.268491	0.0373746	0.22861	0.965617	0.204422	0.792871	0.11904	0.325862	0.0969082	0.198176
	0.811494	0.980974	0.446418	0.683958	0.756579	0.663773					0.936575			0.521614											0.845387							0.618865	0.435234	0.466031	0.0202314	0.574977	0.287131	0.0681803	0.995272	0.502909	0.765302	0.818887	0.791145
	0.816667	1	0.463037	0.693564	0.76864	0.671665					0.95666			0.546974											0.882793							0.978842	0.710106	0.164052	0.160038	0.412012	0.0219761	0.550101	0.600932	0.44153	0.913372	0.199472	0.98782
	0.887931		0.476791	0.715658	0.774123	0.706393					0.970402			0.599424											0.899002							0.257472	0.984735	0.970914	0.321419	0.992045	0.783319	0.228338	0.402391	0.937066	0.149707	0.692251	0.58125
	0.927011		0.480802	0.7195	0.815789	0.73086					0.973573			0.608646											0.947631
	0.93046		0.497421	0.762728	0.822368	0.75296					1			0.623055											0.966334
	0.933908		0.503725	0.776177	0.830044	0.771902								0.626513											0.985037
	0.938506		0.510602	0.786744	0.845395	0.782163								0.639193											1
	0.986207		0.515186	0.818444	0.859101	0.809787								0.640346
	1		0.52894	0.878002	0.871711	0.821626								0.661671
			0.53467	0.891451	0.873904	0.82794								0.666282
			0.540974	0.899135	0.887061	0.833465								0.695677
			0.566189	0.948127	0.895833	0.839779								0.72219
			0.577077	1	0.901316	0.859511								0.746398
			0.586819		0.903509	0.865036								0.751009
			0.621203		0.906798	0.87135								0.806916
			0.625215		0.912281	0.887924								0.823631
			0.62808		0.926535	0.891081								0.848415
			0.634384		0.94682	0.891871								0.945245
			0.667622		0.962719	0.898185								0.949856
			0.680229		1									0.982133
			0.716905											1
			0.735817
			0.738682
			0.744986
			0.752436
			0.766189
			0.783381
			0.786819
			0.802865
			0.804011
			0.808596
			0.809169
			0.832665
			0.841834
			0.845845
			0.845845
			0.852149
			0.87106
			0.882521
			0.896848
			0.935244
			0.957593
			0.965616
			0.966762
			0.966762
			0.985673
			1

## Sheet: Fig 6H
series003	mean	XM	mean	mean scaled	XM scaled	series008	mean	XM	mean	mean scaled	XM scaled	series013	mean	XM	mean	mean scaled	XM scaled	ray01	mean	XM	mean	mean scaled	XM scaled	ray02	mean	XM	mean	mean scaled	XM scaled	ray03	mean	XM	mean	mean scaled	XM scaled	ray04	mean	XM	mean	mean scaled	XM scaled	ray05	mean	XM	mean	mean scaled	XM scaled
C2-STD_RNAscope_bglap_msxb_GFP_1dpi_25102018.lif - Series003	287.16	39.38	Min	0.823435	0	C2-STD_RNAscope_bglap_msxb_GFP_1dpi_25102018.lif - Series008	6.73	43.01	Min	0	0	C2-STD_RNAscope_bglap_msxb_GFP_1dpi_25102018.lif - Series013	2.61	296.62	Min	0.12	0.855819	STD_ray01_center-2.czi	16.84	13.13	Min	0.0922894	0.0270044	STD_ray02_center.czi	31.43	13.48	Min	0.0843111	0.0277481	STD_ray03_center.czi	100.31	42.41	Min	0.660949	0.0297389	STD_ray04_center.czi	55.65	336.79	Min	0.0818374	0.962278	STD_ray05_center.czi	44.18	76.02	Min	0.346936	0.0329979
C2-STD_RNAscope_bglap_msxb_GFP_1dpi_25102018.lif - Series003	250.11	51.99	51.18	0.694152	0.0953137	C2-STD_RNAscope_bglap_msxb_GFP_1dpi_25102018.lif - Series008	9.45	50.54	6.73	0.273917	0.0234645	C2-STD_RNAscope_bglap_msxb_GFP_1dpi_25102018.lif - Series013	2.83	318.39	2.4	0.245714	0.930821	STD_ray01_center-2.czi	16.43	68.73	13.74	0.0800834	0.152544	STD_ray02_center.czi	28.38	40.07	26.4	0.0331881	0.104525	STD_ray03_center.czi	37.92	92.08	15.92	0.172306	0.170687	STD_ray04_center.czi	98.89	320.79	46.35	0.462337	0.91194	STD_ray05_center.czi	33.95	65.33	16.55	0.218483	0
C2-STD_RNAscope_bglap_msxb_GFP_1dpi_25102018.lif - Series003	292.6	52.11	Max	0.842417	0.0962207	C2-STD_RNAscope_bglap_msxb_GFP_1dpi_25102018.lif - Series008	9.15	55.88	Max	0.243706	0.0401047	C2-STD_RNAscope_bglap_msxb_GFP_1dpi_25102018.lif - Series013	2.65	132.93	Max	0.142857	0.291876	STD_ray01_center-2.czi	14.96	85.36	Max	0.0363203	0.190092	STD_ray02_center.czi	27.37	187.63	Max	0.0162588	0.530592	STD_ray03_center.czi	34.9	73.57	Max	0.148653	0.118161	STD_ray04_center.czi	79.55	282.56	Max	0.292151	0.791663	STD_ray05_center.czi	36.26	108.07	Max	0.247489	0.13193
C2-STD_RNAscope_bglap_msxb_GFP_1dpi_25102018.lif - Series003	241.73	55.13	337.76	0.66491	0.119048	C2-STD_RNAscope_bglap_msxb_GFP_1dpi_25102018.lif - Series008	10.53	62.62	16.66	0.382679	0.0611075	C2-STD_RNAscope_bglap_msxb_GFP_1dpi_25102018.lif - Series013	2.72	48.21	4.15	0.182857	0	STD_ray01_center-2.czi	16.52	72.23	47.33	0.0827627	0.160446	STD_ray02_center.czi	79.41	22.04	86.06	0.888535	0.0524644	STD_ray03_center.czi	72.18	120.34	143.6	0.440633	0.25088	STD_ray04_center.czi	78.44	304	159.99	0.282383	0.859116	STD_ray05_center.czi	25.15	74.63	96.19	0.107986	0.0287072
C2-STD_RNAscope_bglap_msxb_GFP_1dpi_25102018.lif - Series003	184.39	55.41		0.464827	0.121164	C2-STD_RNAscope_bglap_msxb_GFP_1dpi_25102018.lif - Series008	11.11	62.92		0.441088	0.0620423	C2-STD_RNAscope_bglap_msxb_GFP_1dpi_25102018.lif - Series013	2.47	286.9		0.04	0.822332	STD_ray01_center-2.czi	15.52	86.32		0.052992	0.19226	STD_ray02_center.czi	52.88	54.77		0.443848	0.14697	STD_ray03_center.czi	78.27	80.13		0.48833	0.136776	STD_ray04_center.czi	102.78	323.03		0.496568	0.918987	STD_ray05_center.czi	28.99	144.34		0.156203	0.243888
C2-STD_RNAscope_bglap_msxb_GFP_1dpi_25102018.lif - Series003	308.08	55.74		0.896434	0.123658	C2-STD_RNAscope_bglap_msxb_GFP_1dpi_25102018.lif - Series008	11.2	65.45		0.450151	0.0699261	C2-STD_RNAscope_bglap_msxb_GFP_1dpi_25102018.lif - Series013	2.4	177.79		0	0.446427	STD_ray01_center-2.czi	14.28	43.61		0.0160762	0.0958251	STD_ray02_center.czi	29.31	113.21		0.0487764	0.31571	STD_ray03_center.czi	89.7	127.11		0.577851	0.270091	STD_ray04_center.czi	74.42	324.83		0.247008	0.92465	STD_ray05_center.czi	35.02	168.59		0.231919	0.318743
C2-STD_RNAscope_bglap_msxb_GFP_1dpi_25102018.lif - Series003	137.34	56.28		0.300649	0.12774	C2-STD_RNAscope_bglap_msxb_GFP_1dpi_25102018.lif - Series008	13.62	71.18		0.693857	0.0877816	C2-STD_RNAscope_bglap_msxb_GFP_1dpi_25102018.lif - Series013	2.82	211.41		0.24	0.562255	STD_ray01_center-2.czi	20.91	4.82		0.213456	0.00824132	STD_ray02_center.czi	34.25	144.49		0.131579	0.406029	STD_ray03_center.czi	50.78	189.93		0.273026	0.448354	STD_ray04_center.czi	63.07	209.54		0.147131	0.561932	STD_ray05_center.czi	26.87	70.07		0.129583	0.0146314
C2-STD_RNAscope_bglap_msxb_GFP_1dpi_25102018.lif - Series003	214.5	56.95		0.569893	0.132804	C2-STD_RNAscope_bglap_msxb_GFP_1dpi_25102018.lif - Series008	14.87	71.48		0.819738	0.0887165	C2-STD_RNAscope_bglap_msxb_GFP_1dpi_25102018.lif - Series013	2.47	193.99		0.04	0.502239	STD_ray01_center-2.czi	18.72	10.3		0.148258	0.0206146	STD_ray02_center.czi	39.34	73.63		0.216896	0.201426	STD_ray03_center.czi	67.3	61.15		0.402412	0.0829171	STD_ray04_center.czi	90.52	226.49		0.388684	0.615259	STD_ray05_center.czi	27.91	130.62		0.142642	0.201537
C2-STD_RNAscope_bglap_msxb_GFP_1dpi_25102018.lif - Series003	261.61	58.2		0.73428	0.142252	C2-STD_RNAscope_bglap_msxb_GFP_1dpi_25102018.lif - Series008	10.81	72.03		0.410876	0.0904303	C2-STD_RNAscope_bglap_msxb_GFP_1dpi_25102018.lif - Series013	2.56	143.39		0.0914286	0.327913	STD_ray01_center-2.czi	20.33	21.62		0.196189	0.046174	STD_ray02_center.czi	35.3	171.53		0.149179	0.484105	STD_ray03_center.czi	21.59	107.87		0.0444079	0.215494	STD_ray04_center.czi	59.5	259.97		0.115716	0.720591	STD_ray05_center.czi	52.83	196.41		0.45555	0.404618
C2-STD_RNAscope_bglap_msxb_GFP_1dpi_25102018.lif - Series003	165.66	60.52		0.39947	0.159788	C2-STD_RNAscope_bglap_msxb_GFP_1dpi_25102018.lif - Series008	9.96	74.13		0.325277	0.0969742	C2-STD_RNAscope_bglap_msxb_GFP_1dpi_25102018.lif - Series013	2.55	154.38		0.0857143	0.365776	STD_ray01_center-2.czi	21.21	34.49		0.222388	0.0752331	STD_ray02_center.czi	34.53	263.44		0.136272	0.749487	STD_ray03_center.czi	34.78	228.92		0.147713	0.558995	STD_ray04_center.czi	51.34	245.92		0.0439106	0.676388	STD_ray05_center.czi	31.08	168.12		0.182446	0.317292
C2-STD_RNAscope_bglap_msxb_GFP_1dpi_25102018.lif - Series003	196.55	61.83		0.507258	0.16969	C2-STD_RNAscope_bglap_msxb_GFP_1dpi_25102018.lif - Series008	12.01	79.61		0.531722	0.114051	C2-STD_RNAscope_bglap_msxb_GFP_1dpi_25102018.lif - Series013	3	338.47		0.342857	1	STD_ray01_center-2.czi	22.42	55.86		0.25841	0.123484	STD_ray02_center.czi	47.61	3.87		0.355515	0	STD_ray03_center.czi	45.23	244.11		0.229558	0.6021	STD_ray04_center.czi	50.14	206.59		0.0333509	0.552651	STD_ray05_center.czi	21.87	146.4		0.0668006	0.250247
C2-STD_RNAscope_bglap_msxb_GFP_1dpi_25102018.lif - Series003	80.43	61.86		0.102066	0.169917	C2-STD_RNAscope_bglap_msxb_GFP_1dpi_25102018.lif - Series008	12.5	80.34		0.581067	0.116325	C2-STD_RNAscope_bglap_msxb_GFP_1dpi_25102018.lif - Series013	2.69	176.69		0.165714	0.442638	STD_ray01_center-2.czi	26.78	1.17		0.388211	0	STD_ray02_center.czi	38.05	36.15		0.195273	0.0932059	STD_ray03_center.czi	32.39	158.11		0.128994	0.358059	STD_ray04_center.czi	86.72	173.24		0.355245	0.447727	STD_ray05_center.czi	32.1	213.6		0.195254	0.45768
C2-STD_RNAscope_bglap_msxb_GFP_1dpi_25102018.lif - Series003	106.06	62.06		0.1915	0.171429	C2-STD_RNAscope_bglap_msxb_GFP_1dpi_25102018.lif - Series008	10.01	81.05		0.330312	0.118538	C2-STD_RNAscope_bglap_msxb_GFP_1dpi_25102018.lif - Series013	2.98	293.14		0.331429	0.84383	STD_ray01_center-2.czi	18.52	71.36		0.142304	0.158482	STD_ray02_center.czi	30.4	110.56		0.0670466	0.308059	STD_ray03_center.czi	40.33	31.93		0.191181	0	STD_ray04_center.czi	82.01	142.73		0.313798	0.351738	STD_ray05_center.czi	44.99	165.36		0.357107	0.308773
C2-STD_RNAscope_bglap_msxb_GFP_1dpi_25102018.lif - Series003	280.39	63.38		0.799812	0.181406	C2-STD_RNAscope_bglap_msxb_GFP_1dpi_25102018.lif - Series008	9.88	81.34		0.317221	0.119442	C2-STD_RNAscope_bglap_msxb_GFP_1dpi_25102018.lif - Series013	2.81	190.99		0.234286	0.491904	STD_ray01_center-2.czi	26.01	424.34		0.365287	0.955474	STD_ray02_center.czi	34.89	211.38		0.142306	0.599168	STD_ray03_center.czi	15.92	118.24		0	0.244921	STD_ray04_center.czi	53.04	234.65		0.0588701	0.640931	STD_ray05_center.czi	55.6	200.1		0.490331	0.416008
C2-STD_RNAscope_bglap_msxb_GFP_1dpi_25102018.lif - Series003	56.45	63.82		0.0183893	0.184732	C2-STD_RNAscope_bglap_msxb_GFP_1dpi_25102018.lif - Series008	12.51	85.44		0.582075	0.132218	C2-STD_RNAscope_bglap_msxb_GFP_1dpi_25102018.lif - Series013	2.55	322.28		0.0857143	0.944222	STD_ray01_center-2.czi	24.61	205.94		0.323608	0.46235	STD_ray02_center.czi	31.66	104.95		0.0881663	0.29186	STD_ray03_center.czi	48.6	174.28		0.255952	0.403944	STD_ray04_center.czi	91.35	317.39		0.395987	0.901243	STD_ray05_center.czi	23.18	67.44		0.0832496	0.00651315
C2-STD_RNAscope_bglap_msxb_GFP_1dpi_25102018.lif - Series003	139.89	65.14		0.309547	0.194709	C2-STD_RNAscope_bglap_msxb_GFP_1dpi_25102018.lif - Series008	12.71	85.98		0.602216	0.1339	C2-STD_RNAscope_bglap_msxb_GFP_1dpi_25102018.lif - Series013	2.5	140.51		0.0571429	0.317991	STD_ray01_center-2.czi	23.28	440.3		0.284013	0.99151	STD_ray02_center.czi	38.55	130.68		0.203654	0.366154	STD_ray03_center.czi	58.46	60.25		0.333177	0.0803632	STD_ray04_center.czi	98.81	68.84		0.461633	0.11927	STD_ray05_center.czi	38.9	244.85		0.280638	0.554142
C2-STD_RNAscope_bglap_msxb_GFP_1dpi_25102018.lif - Series003	233.42	65.83		0.635913	0.199924	C2-STD_RNAscope_bglap_msxb_GFP_1dpi_25102018.lif - Series008	13.71	91.74		0.70292	0.151849	C2-STD_RNAscope_bglap_msxb_GFP_1dpi_25102018.lif - Series013	2.98	282.85		0.331429	0.808379	STD_ray01_center-2.czi	27.3	169.79		0.403692	0.380727	STD_ray02_center.czi	29.22	116		0.0472679	0.323766	STD_ray03_center.czi	35.47	266.43		0.153117	0.665437	STD_ray04_center.czi	60.29	288.51		0.122668	0.810382	STD_ray05_center.czi	30.35	262.6		0.17328	0.608933
C2-STD_RNAscope_bglap_msxb_GFP_1dpi_25102018.lif - Series003	218.05	68.21		0.582281	0.217914	C2-STD_RNAscope_bglap_msxb_GFP_1dpi_25102018.lif - Series008	13.51	92.45		0.682779	0.154062	C2-STD_RNAscope_bglap_msxb_GFP_1dpi_25102018.lif - Series013	2.59	133.96		0.108571	0.295425	STD_ray01_center-2.czi	27.13	414.19		0.398631	0.932557	STD_ray02_center.czi	40.46	87		0.235669	0.240031	STD_ray03_center.czi	50.79	137.27		0.273105	0.298922	STD_ray04_center.czi	52.96	262.13		0.0581661	0.727387	STD_ray05_center.czi	32.65	124.91		0.20216	0.183912
C2-STD_RNAscope_bglap_msxb_GFP_1dpi_25102018.lif - Series003	257.01	70.34		0.718229	0.234014	C2-STD_RNAscope_bglap_msxb_GFP_1dpi_25102018.lif - Series008	10.57	93.87		0.386707	0.158487	C2-STD_RNAscope_bglap_msxb_GFP_1dpi_25102018.lif - Series013	3.28	289.36		0.502857	0.830807	STD_ray01_center-2.czi	23.81	213		0.299792	0.47829	STD_ray02_center.czi	35.48	245.28		0.152196	0.697052	STD_ray03_center.czi	101.64	333.45		0.671366	0.855619	STD_ray04_center.czi	60.03	273.02		0.12038	0.761649	STD_ray05_center.czi	28.6	276.57		0.151306	0.652056
C2-STD_RNAscope_bglap_msxb_GFP_1dpi_25102018.lif - Series003	72.58	72.75		0.0746737	0.25223	C2-STD_RNAscope_bglap_msxb_GFP_1dpi_25102018.lif - Series008	13.3	95.57		0.661631	0.163784	C2-STD_RNAscope_bglap_msxb_GFP_1dpi_25102018.lif - Series013	3.26	268.22		0.491429	0.757976	STD_ray01_center-2.czi	31.49	414.16		0.528431	0.932489	STD_ray02_center.czi	34.69	150.15		0.138954	0.422372	STD_ray03_center.czi	53.53	115.81		0.294565	0.238025	STD_ray04_center.czi	59.96	348.78		0.119764	1	STD_ray05_center.czi	28.69	180.24		0.152436	0.354704
C2-STD_RNAscope_bglap_msxb_GFP_1dpi_25102018.lif - Series003	295.02	72.96		0.850862	0.253817	C2-STD_RNAscope_bglap_msxb_GFP_1dpi_25102018.lif - Series008	10.72	97.32		0.401813	0.169237	C2-STD_RNAscope_bglap_msxb_GFP_1dpi_25102018.lif - Series013	3.49	176.67		0.622857	0.442569	STD_ray01_center-2.czi	29.29	224.6		0.462935	0.504482	STD_ray02_center.czi	28.85	166.04		0.041066	0.468253	STD_ray03_center.czi	51.25	231.79		0.276707	0.56714	STD_ray04_center.czi	68.93	79.49		0.198698	0.152776	STD_ray05_center.czi	25.76	84.86		0.115645	0.0602852
C2-STD_RNAscope_bglap_msxb_GFP_1dpi_25102018.lif - Series003	56.17	76.56		0.0174122	0.281028	C2-STD_RNAscope_bglap_msxb_GFP_1dpi_25102018.lif - Series008	10.1	99.04		0.339376	0.174597	C2-STD_RNAscope_bglap_msxb_GFP_1dpi_25102018.lif - Series013	3.81	103.35		0.805714	0.189968	STD_ray01_center-2.czi	33.79	433.65		0.596904	0.976495	STD_ray02_center.czi	48.43	19.32		0.369259	0.0446106	STD_ray03_center.czi	33.22	90.28		0.135495	0.165579	STD_ray04_center.czi	80.08	93.32		0.296815	0.196288	STD_ray05_center.czi	18.94	68.2		0.03001	0.00885912
C2-STD_RNAscope_bglap_msxb_GFP_1dpi_25102018.lif - Series003	137.36	77.42		0.300719	0.287528	C2-STD_RNAscope_bglap_msxb_GFP_1dpi_25102018.lif - Series008	12.18	99.65		0.548842	0.176498	C2-STD_RNAscope_bglap_msxb_GFP_1dpi_25102018.lif - Series013	3	204.35		0.342857	0.537932	STD_ray01_center-2.czi	25.73	392.17		0.356951	0.882838	STD_ray02_center.czi	28.2	281.16		0.030171	0.800653	STD_ray03_center.czi	64.13	312.05		0.377585	0.794892	STD_ray04_center.czi	159.99	48.68		1	0.055844	STD_ray05_center.czi	16.55	90.53		0	0.0777874
C2-STD_RNAscope_bglap_msxb_GFP_1dpi_25102018.lif - Series003	104.71	80.89		0.186789	0.313757	C2-STD_RNAscope_bglap_msxb_GFP_1dpi_25102018.lif - Series008	15.63	105		0.896274	0.193169	C2-STD_RNAscope_bglap_msxb_GFP_1dpi_25102018.lif - Series013	2.79	241.95		0.222857	0.667471	STD_ray01_center-2.czi	25.97	444.06		0.364096	1	STD_ray02_center.czi	27.9	227.55		0.0251425	0.645858	STD_ray03_center.czi	41.37	95.17		0.199326	0.179455	STD_ray04_center.czi	54.38	185.59		0.0706617	0.486582	STD_ray05_center.czi	42.78	96.19		0.329357	0.0952587
C2-STD_RNAscope_bglap_msxb_GFP_1dpi_25102018.lif - Series003	72.5	84.27		0.0743946	0.339305	C2-STD_RNAscope_bglap_msxb_GFP_1dpi_25102018.lif - Series008	12.7	105.03		0.601208	0.193263	C2-STD_RNAscope_bglap_msxb_GFP_1dpi_25102018.lif - Series013	2.42	246.76		0.0114286	0.684042	STD_ray01_center-2.czi	26.85	211.24		0.390295	0.474316	STD_ray02_center.czi	53.77	44.61		0.458766	0.117633	STD_ray03_center.czi	65.83	73.13		0.390899	0.116913	STD_ray04_center.czi	73.42	264.26		0.238208	0.734088	STD_ray05_center.czi	17.51	70.06		0.0120542	0.0146006
C2-STD_RNAscope_bglap_msxb_GFP_1dpi_25102018.lif - Series003	156.04	85.44		0.365901	0.348148	C2-STD_RNAscope_bglap_msxb_GFP_1dpi_25102018.lif - Series008	14.22	105.12		0.75428	0.193543	C2-STD_RNAscope_bglap_msxb_GFP_1dpi_25102018.lif - Series013	2.8	60.44		0.228571	0.0421346	STD_ray01_center-2.czi	23.13	373.94		0.279547	0.841676	STD_ray02_center.czi	41.93	110.01		0.260308	0.306471	STD_ray03_center.czi	40.68	154.57		0.193922	0.348014	STD_ray04_center.czi	109.81	60.99		0.55843	0.0945729	STD_ray05_center.czi	25.59	106.96		0.113511	0.128504
C2-STD_RNAscope_bglap_msxb_GFP_1dpi_25102018.lif - Series003	181.46	88.31		0.454603	0.369841	C2-STD_RNAscope_bglap_msxb_GFP_1dpi_25102018.lif - Series008	11.59	112.52		0.489426	0.216603	C2-STD_RNAscope_bglap_msxb_GFP_1dpi_25102018.lif - Series013	4.15	90.76		1	0.146593	STD_ray01_center-2.czi	27.56	235.93		0.411432	0.530064	STD_ray02_center.czi	28.5	159.28		0.0351995	0.448734	STD_ray03_center.czi	32.56	42.26		0.130326	0.0293133	STD_ray04_center.czi	65.03	225.1		0.164379	0.610886	STD_ray05_center.czi	28.86	236.72		0.154571	0.529047
C2-STD_RNAscope_bglap_msxb_GFP_1dpi_25102018.lif - Series003	132.73	89.29		0.284563	0.377249	C2-STD_RNAscope_bglap_msxb_GFP_1dpi_25102018.lif - Series008	12.2	117.44		0.550856	0.231934	C2-STD_RNAscope_bglap_msxb_GFP_1dpi_25102018.lif - Series013	3.34	192.19		0.537143	0.496038	STD_ray01_center-2.czi	27.99	264.47		0.424233	0.594504	STD_ray02_center.czi	43.55	60.41		0.287462	0.163255	STD_ray03_center.czi	51.28	111		0.276942	0.224376	STD_ray04_center.czi	61.14	164.41		0.130148	0.419947	STD_ray05_center.czi	29.48	250.35		0.162356	0.57112
C2-STD_RNAscope_bglap_msxb_GFP_1dpi_25102018.lif - Series003	158.57	93.17		0.37473	0.406576	C2-STD_RNAscope_bglap_msxb_GFP_1dpi_25102018.lif - Series008	11.73	118.33		0.503525	0.234708	C2-STD_RNAscope_bglap_msxb_GFP_1dpi_25102018.lif - Series013	3.13	174.74		0.417143	0.43592	STD_ray01_center-2.czi	28.52	342.08		0.440012	0.76974	STD_ray02_center.czi	27.67	231.96		0.0212873	0.658592	STD_ray03_center.czi	25.74	196.04		0.076911	0.465692	STD_ray04_center.czi	60.57	215.43		0.125132	0.580462	STD_ray05_center.czi	23.03	116.06		0.0813661	0.156593
C2-STD_RNAscope_bglap_msxb_GFP_1dpi_25102018.lif - Series003	91.3	94.05		0.139996	0.413228	C2-STD_RNAscope_bglap_msxb_GFP_1dpi_25102018.lif - Series008	12.44	120.78		0.575025	0.242342							STD_ray01_center-2.czi	37.92	416.8		0.719857	0.93845	STD_ray02_center.czi	31.65	143.51		0.0879987	0.403199	STD_ray03_center.czi	67.2	116.06		0.401629	0.238734	STD_ray04_center.czi	52.01	199.46		0.0498064	0.530219	STD_ray05_center.czi	28.03	276.24		0.144149	0.651037
C2-STD_RNAscope_bglap_msxb_GFP_1dpi_25102018.lif - Series003	255.54	95.25		0.713099	0.422298	C2-STD_RNAscope_bglap_msxb_GFP_1dpi_25102018.lif - Series008	12.58	122.85		0.589124	0.248792							STD_ray01_center-2.czi	28.24	168.6		0.431676	0.37804	STD_ray02_center.czi	28.65	183.04		0.0377137	0.517339	STD_ray03_center.czi	32.62	211.03		0.130796	0.508229	STD_ray04_center.czi	54.6	130.82		0.0725977	0.314268	STD_ray05_center.czi	48.49	314.51		0.401055	0.769169
C2-STD_RNAscope_bglap_msxb_GFP_1dpi_25102018.lif - Series003	307.57	96.55		0.894654	0.432124	C2-STD_RNAscope_bglap_msxb_GFP_1dpi_25102018.lif - Series008	10.7	130.46		0.399799	0.272506							STD_ray01_center-2.czi	26.26	375.67		0.37273	0.845582	STD_ray02_center.czi	51.22	75.01		0.416024	0.205411	STD_ray03_center.czi	54.3	379.21		0.300595	0.985471	STD_ray04_center.czi	46.35	104.58		0	0.231713	STD_ray05_center.czi	30.14	199.66		0.170643	0.41465
C2-STD_RNAscope_bglap_msxb_GFP_1dpi_25102018.lif - Series003	238.56	102.72		0.653849	0.47876	C2-STD_RNAscope_bglap_msxb_GFP_1dpi_25102018.lif - Series008	10.67	131.5		0.396777	0.275747							STD_ray01_center-2.czi	25	285.42		0.335219	0.641807	STD_ray02_center.czi	27.38	238.35		0.0164264	0.677042	STD_ray03_center.czi	25.62	174.34		0.0759712	0.404115	STD_ray04_center.czi	54.8	114.59		0.0743576	0.263206	STD_ray05_center.czi	29.66	314.93		0.164616	0.770465
C2-STD_RNAscope_bglap_msxb_GFP_1dpi_25102018.lif - Series003	337.76	103.33		1	0.483371	C2-STD_RNAscope_bglap_msxb_GFP_1dpi_25102018.lif - Series008	10.23	137.11		0.352467	0.293229							STD_ray01_center-2.czi	22.78	208.56		0.269128	0.468265	STD_ray02_center.czi	27.7	219.63		0.0217901	0.62299	STD_ray03_center.czi	40.45	256.79		0.192121	0.638082	STD_ray04_center.czi	53.14	125.11		0.0597501	0.296303	STD_ray05_center.czi	22.34	207.51		0.0727022	0.438881
C2-STD_RNAscope_bglap_msxb_GFP_1dpi_25102018.lif - Series003	277.31	105.87		0.789064	0.50257	C2-STD_RNAscope_bglap_msxb_GFP_1dpi_25102018.lif - Series008	14.91	137.47		0.823766	0.29435							STD_ray01_center-2.czi	23.13	251.9		0.279547	0.566123	STD_ray02_center.czi	44.32	286.25		0.300369	0.81535	STD_ray03_center.czi	41.52	49.06		0.200501	0.0486095	STD_ray04_center.czi	63.51	206.28		0.151003	0.551675	STD_ray05_center.czi	36.84	104.18		0.254771	0.119922
C2-STD_RNAscope_bglap_msxb_GFP_1dpi_25102018.lif - Series003	106.36	106.28		0.192547	0.505669	C2-STD_RNAscope_bglap_msxb_GFP_1dpi_25102018.lif - Series008	11.06	138.64		0.436052	0.297996							STD_ray01_center-2.czi	23.39	181.38		0.287288	0.406896	STD_ray02_center.czi	60.75	320.63		0.575763	0.914619	STD_ray03_center.czi	85.99	60.11		0.548794	0.0799659	STD_ray04_center.czi	92.39	343.97		0.405139	0.984867	STD_ray05_center.czi	21.2	126.43		0.0583877	0.188604
C2-STD_RNAscope_bglap_msxb_GFP_1dpi_25102018.lif - Series003	86.57	106.39		0.123491	0.5065	C2-STD_RNAscope_bglap_msxb_GFP_1dpi_25102018.lif - Series008	12.84	140.68		0.615307	0.304353							STD_ray01_center-2.czi	22.98	209.11		0.275082	0.469507	STD_ray02_center.czi	27.74	322.69		0.0224606	0.920567	STD_ray03_center.czi	41.02	275.51		0.196585	0.691203	STD_ray04_center.czi	49.14	100.65		0.0245512	0.219349	STD_ray05_center.czi	41.86	146.05		0.317805	0.249167
C2-STD_RNAscope_bglap_msxb_GFP_1dpi_25102018.lif - Series003	119.31	106.86		0.237735	0.510053	C2-STD_RNAscope_bglap_msxb_GFP_1dpi_25102018.lif - Series008	11.53	148.79		0.483384	0.329625							STD_ray01_center-2.czi	25.6	310.8		0.353081	0.699113	STD_ray02_center.czi	52.7	60.15		0.440831	0.162504	STD_ray03_center.czi	62.35	338.68		0.363643	0.87046	STD_ray04_center.czi	55.4	157.53		0.0796375	0.398301	STD_ray05_center.czi	36.88	120.55		0.255274	0.170453
C2-STD_RNAscope_bglap_msxb_GFP_1dpi_25102018.lif - Series003	213.37	109.36		0.56595	0.528949	C2-STD_RNAscope_bglap_msxb_GFP_1dpi_25102018.lif - Series008	9.86	149.54		0.315206	0.331962							STD_ray01_center-2.czi	19.74	442.39		0.178625	0.996229	STD_ray02_center.czi	31.82	260.99		0.0908481	0.742413	STD_ray03_center.czi	38.94	154.48		0.180294	0.347758	STD_ray04_center.czi	101.93	41.78		0.489088	0.0341356	STD_ray05_center.czi	30.32	281.85		0.172903	0.668354
C2-STD_RNAscope_bglap_msxb_GFP_1dpi_25102018.lif - Series003	224.67	109.58		0.605381	0.530612	C2-STD_RNAscope_bglap_msxb_GFP_1dpi_25102018.lif - Series008	11.23	151.97		0.453172	0.339534							STD_ray01_center-2.czi	22.66	239.66		0.265555	0.538486	STD_ray02_center.czi	36.86	141.04		0.175327	0.396067	STD_ray03_center.czi	98.02	358.18		0.643014	0.925795	STD_ray04_center.czi	57.9	178.28		0.101637	0.463583	STD_ray05_center.czi	34.11	204.01		0.220492	0.428078
C2-STD_RNAscope_bglap_msxb_GFP_1dpi_25102018.lif - Series003	307.44	111.66		0.894201	0.546334	C2-STD_RNAscope_bglap_msxb_GFP_1dpi_25102018.lif - Series008	8.52	156.74		0.180262	0.354398							STD_ray01_center-2.czi	26.67	329.27		0.384936	0.740816	STD_ray02_center.czi	32.99	252.22		0.110459	0.717091	STD_ray03_center.czi	33.54	222.62		0.138001	0.541118	STD_ray04_center.czi	92.95	283.16		0.410067	0.79355	STD_ray05_center.czi	26.2	159.83		0.12117	0.291703
C2-STD_RNAscope_bglap_msxb_GFP_1dpi_25102018.lif - Series003	147.62	115.36		0.33652	0.574301	C2-STD_RNAscope_bglap_msxb_GFP_1dpi_25102018.lif - Series008	12.39	157.96		0.56999	0.3582							STD_ray01_center-2.czi	37.39	347.73		0.704079	0.782497	STD_ray02_center.czi	38.22	160.4		0.198123	0.451968	STD_ray03_center.czi	55.58	329.88		0.31062	0.845488	STD_ray04_center.czi	64.64	83.98		0.160947	0.166903	STD_ray05_center.czi	32.84	138.85		0.204545	0.226942
C2-STD_RNAscope_bglap_msxb_GFP_1dpi_25102018.lif - Series003	259.1	116.32		0.725522	0.581557	C2-STD_RNAscope_bglap_msxb_GFP_1dpi_25102018.lif - Series008	16.66	161.43		1	0.369013							STD_ray01_center-2.czi	20	248.7		0.186365	0.558897	STD_ray02_center.czi	43.31	186.03		0.283439	0.525972	STD_ray03_center.czi	44.89	138.49		0.226895	0.302384	STD_ray04_center.czi	54.39	80.52		0.0707497	0.156017	STD_ray05_center.czi	28.86	167.29		0.154571	0.31473
C2-STD_RNAscope_bglap_msxb_GFP_1dpi_25102018.lif - Series003	104	116.4		0.184312	0.582162	C2-STD_RNAscope_bglap_msxb_GFP_1dpi_25102018.lif - Series008	10.82	162.31		0.411883	0.371755							STD_ray01_center-2.czi	27.38	344.91		0.406073	0.77613	STD_ray02_center.czi	35.53	298.46		0.153034	0.850605	STD_ray03_center.czi	43.05	247.35		0.212484	0.611294	STD_ray04_center.czi	56.7	110.09		0.0910771	0.249048	STD_ray05_center.czi	28.37	263.49		0.148418	0.61168
C2-STD_RNAscope_bglap_msxb_GFP_1dpi_25102018.lif - Series003	282.88	116.82		0.8085	0.585336	C2-STD_RNAscope_bglap_msxb_GFP_1dpi_25102018.lif - Series008	9.89	171.51		0.318228	0.400424							STD_ray01_center-2.czi	22.97	211.78		0.274784	0.475536	STD_ray02_center.czi	28.02	97.98		0.0271539	0.271735	STD_ray03_center.czi	28.87	187.2		0.101425	0.440607	STD_ray04_center.czi	73.71	242.93		0.24076	0.666981	STD_ray05_center.czi	32.28	389.29		0.197514	1
C2-STD_RNAscope_bglap_msxb_GFP_1dpi_25102018.lif - Series003	162.35	118.07		0.38792	0.594785	C2-STD_RNAscope_bglap_msxb_GFP_1dpi_25102018.lif - Series008	11.61	173.08		0.49144	0.405316							STD_ray01_center-2.czi	23.02	391.09		0.276273	0.880399	STD_ray02_center.czi	43.86	232.43		0.292658	0.659949	STD_ray03_center.czi	41.59	382.61		0.201049	0.995119	STD_ray04_center.czi	53.74	194.04		0.0650299	0.513167	STD_ray05_center.czi	27.03	186.01		0.131592	0.372515
C2-STD_RNAscope_bglap_msxb_GFP_1dpi_25102018.lif - Series003	122.6	119.4		0.249215	0.604837	C2-STD_RNAscope_bglap_msxb_GFP_1dpi_25102018.lif - Series008	11.27	177.75		0.4572	0.419868							STD_ray01_center-2.czi	26.92	324.47		0.392379	0.729978	STD_ray02_center.czi	28.1	240.16		0.0284948	0.682268	STD_ray03_center.czi	25.49	316.31		0.074953	0.806981	STD_ray04_center.czi	74.11	120.03		0.24428	0.280321	STD_ray05_center.czi	24.45	106.73		0.0991964	0.127794
C2-STD_RNAscope_bglap_msxb_GFP_1dpi_25102018.lif - Series003	296.07	125.53		0.854526	0.651172	C2-STD_RNAscope_bglap_msxb_GFP_1dpi_25102018.lif - Series008	10.5	178.94		0.379658	0.423577							STD_ray01_center-2.czi	20.57	193.17		0.203334	0.433516	STD_ray02_center.czi	86.06	309.87		1	0.88355	STD_ray03_center.czi	33.81	301.11		0.140116	0.763848	STD_ray04_center.czi	78.37	268.87		0.281767	0.748592	STD_ray05_center.czi	21.39	189.07		0.0607735	0.381961
C2-STD_RNAscope_bglap_msxb_GFP_1dpi_25102018.lif - Series003	315.84	125.8		0.923512	0.653212	C2-STD_RNAscope_bglap_msxb_GFP_1dpi_25102018.lif - Series008	12.71	183.06		0.602216	0.436415							STD_ray01_center-2.czi	29.55	372.63		0.470676	0.838718	STD_ray02_center.czi	31.72	110.7		0.089172	0.308463	STD_ray03_center.czi	88.93	364.78		0.57182	0.944523	STD_ray04_center.czi	70.55	173.93		0.212953	0.449898	STD_ray05_center.czi	25.6	125.32		0.113636	0.185177
C2-STD_RNAscope_bglap_msxb_GFP_1dpi_25102018.lif - Series003	192.27	128.11		0.492323	0.670673	C2-STD_RNAscope_bglap_msxb_GFP_1dpi_25102018.lif - Series008	14.92	188.17		0.824773	0.452339							STD_ray01_center-2.czi	47.33	423.86		1	0.95439	STD_ray02_center.czi	28.16	117.19		0.0295005	0.327202	STD_ray03_center.czi	49.87	336.01		0.265899	0.862883	STD_ray04_center.czi	98.2	56.01		0.456265	0.0789051	STD_ray05_center.czi	23.24	227.57		0.084003	0.500803
C2-STD_RNAscope_bglap_msxb_GFP_1dpi_25102018.lif - Series003	80.05	128.6		0.10074	0.674376	C2-STD_RNAscope_bglap_msxb_GFP_1dpi_25102018.lif - Series008	10.61	188.66		0.390735	0.453866							STD_ray01_center-2.czi	24.42	299.69		0.317952	0.674027	STD_ray02_center.czi	52.62	199.91		0.43949	0.56605	STD_ray03_center.czi	52.36	262.55		0.285401	0.654427	STD_ray04_center.czi	66.78	141.92		0.179778	0.34919	STD_ray05_center.czi	43.15	301.48		0.334003	0.728948
C2-STD_RNAscope_bglap_msxb_GFP_1dpi_25102018.lif - Series003	164.05	131.24		0.393852	0.694331	C2-STD_RNAscope_bglap_msxb_GFP_1dpi_25102018.lif - Series008	11.81	192.44		0.511581	0.465645							STD_ray01_center-2.czi	33.12	404.18		0.576957	0.909955	STD_ray02_center.czi	44.99	279.55		0.311599	0.796004	STD_ray03_center.czi	39.41	92.47		0.183976	0.171793	STD_ray04_center.czi	90.61	51.35		0.389476	0.0642441	STD_ray05_center.czi	37.2	274.72		0.259292	0.646345
C2-STD_RNAscope_bglap_msxb_GFP_1dpi_25102018.lif - Series003	64.71	131.75		0.0472119	0.698186	C2-STD_RNAscope_bglap_msxb_GFP_1dpi_25102018.lif - Series008	9.09	199.66		0.237664	0.488143							STD_ray01_center-2.czi	18.54	259.92		0.1429	0.584231	STD_ray02_center.czi	38.56	86.09		0.203822	0.237404	STD_ray03_center.czi	51.55	158.47		0.279057	0.359081	STD_ray04_center.czi	76.96	69.78		0.269359	0.122227	STD_ray05_center.czi	32.12	158.74		0.195505	0.288338
C2-STD_RNAscope_bglap_msxb_GFP_1dpi_25102018.lif - Series003	275.99	132.9		0.784458	0.706878	C2-STD_RNAscope_bglap_msxb_GFP_1dpi_25102018.lif - Series008	11.81	202.63		0.511581	0.497398							STD_ray01_center-2.czi	21.24	208.3		0.223281	0.467678	STD_ray02_center.czi	43.93	143.78		0.293832	0.403979	STD_ray03_center.czi	143.6	371.97		1	0.964926	STD_ray04_center.czi	53.19	159.57		0.0601901	0.404719	STD_ray05_center.czi	24.75	144.33		0.102963	0.243857
C2-STD_RNAscope_bglap_msxb_GFP_1dpi_25102018.lif - Series003	320.9	134.81		0.941168	0.721315	C2-STD_RNAscope_bglap_msxb_GFP_1dpi_25102018.lif - Series008	10.38	203.77		0.367573	0.50095							STD_ray01_center-2.czi	20.69	227.74		0.206907	0.511572	STD_ray02_center.czi	38.83	176.16		0.208347	0.497474	STD_ray03_center.czi	15.94	264.75		0.000156642	0.66067	STD_ray04_center.czi	63.59	192.92		0.151707	0.509643	STD_ray05_center.czi	41.07	94.98		0.307885	0.0915236
C2-STD_RNAscope_bglap_msxb_GFP_1dpi_25102018.lif - Series003	140.89	135.04		0.313036	0.723054	C2-STD_RNAscope_bglap_msxb_GFP_1dpi_25102018.lif - Series008	9.85	204.11		0.314199	0.50201							STD_ray01_center-2.czi	18.92	254.8		0.154213	0.57267	STD_ray02_center.czi	66.08	333.9		0.665102	0.952935	STD_ray03_center.czi	93.29	384.33		0.605968	1	STD_ray04_center.czi	94.54	321.67		0.424058	0.914708	STD_ray05_center.czi	25.16	211.23		0.108112	0.450364
C2-STD_RNAscope_bglap_msxb_GFP_1dpi_25102018.lif - Series003	269.61	138.15		0.762196	0.746561	C2-STD_RNAscope_bglap_msxb_GFP_1dpi_25102018.lif - Series008	10.8	204.82		0.409869	0.504222							STD_ray01_center-2.czi	23.79	327.08		0.299196	0.735871	STD_ray02_center.czi	34.36	37.52		0.133423	0.0971617	STD_ray03_center.czi	45.45	314.15		0.231281	0.800851	STD_ray04_center.czi	49.43	217.56		0.0271031	0.587164	STD_ray05_center.czi	26.62	253.04		0.126444	0.579423
C2-STD_RNAscope_bglap_msxb_GFP_1dpi_25102018.lif - Series003	100.07	138.84		0.170598	0.751776	C2-STD_RNAscope_bglap_msxb_GFP_1dpi_25102018.lif - Series008	12.83	208.14		0.6143	0.514568							STD_ray01_center-2.czi	20.6	237.98		0.204227	0.534693	STD_ray02_center.czi	46.92	13.74		0.343949	0.0284988	STD_ray03_center.czi	66.29	352.05		0.394502	0.9084	STD_ray04_center.czi	64.68	229.69		0.161299	0.625326	STD_ray05_center.czi	26.06	104.32		0.119412	0.120354
C2-STD_RNAscope_bglap_msxb_GFP_1dpi_25102018.lif - Series003	75.22	138.95		0.0838858	0.752608	C2-STD_RNAscope_bglap_msxb_GFP_1dpi_25102018.lif - Series008	10.12	211.97		0.34139	0.526503							STD_ray01_center-2.czi	23.36	317.93		0.286395	0.715211	STD_ray02_center.czi	44.61	140.53		0.30523	0.394595	STD_ray03_center.czi	28.21	176.85		0.0962563	0.411237	STD_ray04_center.czi	88.47	168.21		0.370644	0.431902	STD_ray05_center.czi	26.09	109.69		0.119789	0.13693
C2-STD_RNAscope_bglap_msxb_GFP_1dpi_25102018.lif - Series003	222.36	141.62		0.59732	0.772789	C2-STD_RNAscope_bglap_msxb_GFP_1dpi_25102018.lif - Series008	10.79	212.35		0.408862	0.527687							STD_ray01_center-2.czi	21.17	215.42		0.221197	0.483754	STD_ray02_center.czi	58.57	303.34		0.539222	0.864696	STD_ray03_center.czi	44.45	241.27		0.223449	0.594041	STD_ray04_center.czi	63.4	215.81		0.150035	0.581658	STD_ray05_center.czi	30.6	191.31		0.176419	0.388875
C2-STD_RNAscope_bglap_msxb_GFP_1dpi_25102018.lif - Series003	159.5	146.09		0.377975	0.806576	C2-STD_RNAscope_bglap_msxb_GFP_1dpi_25102018.lif - Series008	12.15	215.62		0.545821	0.537877							STD_ray01_center-2.czi	29.37	400.26		0.465317	0.901104	STD_ray02_center.czi	42.91	65.84		0.276735	0.178933	STD_ray03_center.czi	35.89	159.03		0.156407	0.36067	STD_ray04_center.czi	78.55	82.85		0.283351	0.163347	STD_ray05_center.czi	29.84	124.8		0.166876	0.183572
C2-STD_RNAscope_bglap_msxb_GFP_1dpi_25102018.lif - Series003	200.82	146.36		0.522158	0.808617	C2-STD_RNAscope_bglap_msxb_GFP_1dpi_25102018.lif - Series008	12.08	215.77		0.538771	0.538344							STD_ray01_center-2.czi	20.1	213.04		0.189342	0.478381	STD_ray02_center.czi	40.75	114.18		0.24053	0.318511	STD_ray03_center.czi	50.24	274.06		0.268797	0.687089	STD_ray04_center.czi	62.47	244.81		0.141851	0.672896	STD_ray05_center.czi	22.51	173.78		0.0748368	0.334764
C2-STD_RNAscope_bglap_msxb_GFP_1dpi_25102018.lif - Series003	69.7	148.93		0.0646242	0.828042	C2-STD_RNAscope_bglap_msxb_GFP_1dpi_25102018.lif - Series008	10.29	219.17		0.35851	0.548939							STD_ray01_center-2.czi	19.82	246.6		0.181006	0.554156	STD_ray02_center.czi	49.85	320.08		0.393061	0.913031	STD_ray03_center.czi	51.06	132.39		0.275219	0.285074	STD_ray04_center.czi	53.27	152.96		0.0608941	0.383923	STD_ray05_center.czi	36.1	244.57		0.24548	0.553278
C2-STD_RNAscope_bglap_msxb_GFP_1dpi_25102018.lif - Series003	119.54	153.94		0.238537	0.865911	C2-STD_RNAscope_bglap_msxb_GFP_1dpi_25102018.lif - Series008	13.37	221.47		0.668681	0.556106							STD_ray01_center-2.czi	27.09	383.59		0.39744	0.863465	STD_ray02_center.czi	51.72	32.7		0.424405	0.0832443	STD_ray03_center.czi	31.57	178.93		0.122572	0.41714	STD_ray04_center.czi	67.87	98.11		0.18937	0.211358	STD_ray05_center.czi	31.3	291.44		0.185208	0.697957
C2-STD_RNAscope_bglap_msxb_GFP_1dpi_25102018.lif - Series003	79.65	154.47		0.099344	0.869917	C2-STD_RNAscope_bglap_msxb_GFP_1dpi_25102018.lif - Series008	10.18	223.64		0.347432	0.562868							STD_ray01_center-2.czi	17.31	151.21		0.106282	0.338775	STD_ray02_center.czi	48.54	48.81		0.371103	0.129761	STD_ray03_center.czi	37.14	163.03		0.166197	0.37202	STD_ray04_center.czi	59.35	225.53		0.114396	0.612238	STD_ray05_center.czi	27.51	126.15		0.137619	0.187739
C2-STD_RNAscope_bglap_msxb_GFP_1dpi_25102018.lif - Series003	90.46	162.09		0.137065	0.927513	C2-STD_RNAscope_bglap_msxb_GFP_1dpi_25102018.lif - Series008	10.22	227.69		0.35146	0.575488							STD_ray01_center-2.czi	27.94	333.53		0.422745	0.750435	STD_ray02_center.czi	40.52	200.23		0.236674	0.566974	STD_ray03_center.czi	64.33	343.32		0.379151	0.883627	STD_ray04_center.czi	57.32	138.47		0.0965329	0.338336	STD_ray05_center.czi	27.39	205.21		0.136113	0.431782
C2-STD_RNAscope_bglap_msxb_GFP_1dpi_25102018.lif - Series003	73.77	165.48		0.0788262	0.953137	C2-STD_RNAscope_bglap_msxb_GFP_1dpi_25102018.lif - Series008	12.25	227.85		0.555891	0.575987							STD_ray01_center-2.czi	22.19	372.14		0.251563	0.837612	STD_ray02_center.czi	39.94	167.13		0.226953	0.4714	STD_ray03_center.czi	42.51	248.5		0.208255	0.614557	STD_ray04_center.czi	69.31	251.65		0.202042	0.694416	STD_ray05_center.czi	32.67	261.67		0.202411	0.606062
C2-STD_RNAscope_bglap_msxb_GFP_1dpi_25102018.lif - Series003	51.18	171.68		0	1	C2-STD_RNAscope_bglap_msxb_GFP_1dpi_25102018.lif - Series008	11.18	228.13		0.448137	0.57686							STD_ray01_center-2.czi	21.03	347.05		0.217029	0.780961	STD_ray02_center.czi	51.6	328.3		0.422394	0.936766	STD_ray03_center.czi	94.27	366.87		0.613643	0.950454	STD_ray04_center.czi	62.3	300.41		0.140356	0.847821	STD_ray05_center.czi	22	303.47		0.0684329	0.735091
						C2-STD_RNAscope_bglap_msxb_GFP_1dpi_25102018.lif - Series008	10.52	228.36		0.381672	0.577576							STD_ray01_center-2.czi	21.62	321.69		0.234594	0.723701	STD_ray02_center.czi	59.23	15.7		0.550285	0.0341582	STD_ray03_center.czi	43	223.52		0.212093	0.543672	STD_ray04_center.czi	55.69	195.43		0.0821894	0.51754	STD_ray05_center.czi	24.25	217.35		0.0966851	0.469255
						C2-STD_RNAscope_bglap_msxb_GFP_1dpi_25102018.lif - Series008	10.61	229.66		0.390735	0.581627							STD_ray01_center-2.czi	16.94	151.56		0.0952664	0.339565	STD_ray02_center.czi	46.31	281.03		0.333724	0.800277	STD_ray03_center.czi	56.21	304.81		0.315555	0.774347	STD_ray04_center.czi	61.57	152.13		0.133932	0.381312	STD_ray05_center.czi	47.98	169.07		0.394651	0.320225
						C2-STD_RNAscope_bglap_msxb_GFP_1dpi_25102018.lif - Series008	12.6	234.84		0.591138	0.597769							STD_ray01_center-2.czi	23.74	364.12		0.297708	0.819504	STD_ray02_center.czi	34.69	58.98		0.138954	0.159126	STD_ray03_center.czi	82.76	277.81		0.523496	0.69773	STD_ray04_center.czi	62.32	325.81		0.140532	0.927733	STD_ray05_center.czi	37.58	324.09		0.264063	0.798741
						C2-STD_RNAscope_bglap_msxb_GFP_1dpi_25102018.lif - Series008	16.21	235.15		0.954683	0.598735							STD_ray01_center-2.czi	20.82	354.4		0.210777	0.797557	STD_ray02_center.czi	31.56	252.01		0.0864901	0.716484	STD_ray03_center.czi	41.8	264.8		0.202694	0.660812	STD_ray04_center.czi	67.18	122.22		0.183298	0.287211	STD_ray05_center.czi	27.6	309.5		0.138749	0.753704
						C2-STD_RNAscope_bglap_msxb_GFP_1dpi_25102018.lif - Series008	14.4	237.93		0.772407	0.607398							STD_ray01_center-2.czi	21.42	356.16		0.228639	0.801531	STD_ray02_center.czi	30.74	208.46		0.0727456	0.590737	STD_ray03_center.czi	48.4	325.24		0.254386	0.832321	STD_ray04_center.czi	49.13	252.51		0.0244632	0.697121	STD_ray05_center.czi	22.35	229.96		0.0728277	0.50818
						C2-STD_RNAscope_bglap_msxb_GFP_1dpi_25102018.lif - Series008	10.98	239.91		0.427996	0.613568							STD_ray01_center-2.czi	19.8	380.93		0.180411	0.857459	STD_ray02_center.czi	30.85	263.55		0.0745893	0.749805							STD_ray04_center.czi	70.34	87.4		0.211105	0.177662	STD_ray05_center.czi	37.26	135.73		0.260045	0.217311
						C2-STD_RNAscope_bglap_msxb_GFP_1dpi_25102018.lif - Series008	11.57	242.25		0.487412	0.620859							STD_ray01_center-2.czi	19.6	242.02		0.174457	0.543814	STD_ray02_center.czi	47.34	297.93		0.350989	0.849075							STD_ray04_center.czi	75.61	205.48		0.25748	0.549158	STD_ray05_center.czi	20.58	203.89		0.0506027	0.427707
						C2-STD_RNAscope_bglap_msxb_GFP_1dpi_25102018.lif - Series008	12.91	243.54		0.622356	0.624879							STD_ray01_center-2.czi	20.87	354.53		0.212266	0.79785	STD_ray02_center.czi	47.36	222.73		0.351324	0.631941							STD_ray04_center.czi	92.15	30.93		0.403027	0	STD_ray05_center.czi	30.55	283.93		0.175791	0.674775
						C2-STD_RNAscope_bglap_msxb_GFP_1dpi_25102018.lif - Series008	9.83	247.22		0.312185	0.636347							STD_ray01_center-2.czi	21.91	144.86		0.243227	0.324437	STD_ray02_center.czi	34.53	245.01		0.136272	0.696272							STD_ray04_center.czi	57.56	147.44		0.0986448	0.366557	STD_ray05_center.czi	58.24	227.65		0.523481	0.50105
						C2-STD_RNAscope_bglap_msxb_GFP_1dpi_25102018.lif - Series008	12.05	247.24		0.53575	0.636409							STD_ray01_center-2.czi	22.28	232.85		0.254242	0.52311	STD_ray02_center.czi	36.86	138.23		0.175327	0.387954							STD_ray04_center.czi	49.68	70.95		0.0293031	0.125908	STD_ray05_center.czi	42.16	300.18		0.321572	0.724935
						C2-STD_RNAscope_bglap_msxb_GFP_1dpi_25102018.lif - Series008	11.2	248.9		0.450151	0.641582							STD_ray01_center-2.czi	21.22	258.71		0.222685	0.581499	STD_ray02_center.czi	38.61	168.72		0.20466	0.475991							STD_ray04_center.czi	49.99	334.02		0.032031	0.953563	STD_ray05_center.czi	62.12	282.08		0.5722	0.669064
						C2-STD_RNAscope_bglap_msxb_GFP_1dpi_25102018.lif - Series008	14.05	249.49		0.73716	0.64342							STD_ray01_center-2.czi	13.74	124.71		0	0.278941	STD_ray02_center.czi	60.7	284.44		0.574925	0.810123							STD_ray04_center.czi	63.53	171.57		0.151179	0.442473	STD_ray05_center.czi	30.04	253.74		0.169387	0.581584
						C2-STD_RNAscope_bglap_msxb_GFP_1dpi_25102018.lif - Series008	11.76	260.78		0.506546	0.678601							STD_ray01_center-2.czi	27.81	210.9		0.418875	0.473549	STD_ray02_center.czi	43.94	322.71		0.293999	0.920625							STD_ray04_center.czi	76.17	189.06		0.262408	0.497499	STD_ray05_center.czi	28.86	198.8		0.154571	0.411995
						C2-STD_RNAscope_bglap_msxb_GFP_1dpi_25102018.lif - Series008	12.82	262.47		0.613293	0.683868							STD_ray01_center-2.czi	22.84	185.88		0.270914	0.417056	STD_ray02_center.czi	31.34	109.43		0.0828025	0.304796							STD_ray04_center.czi	84.1	294.07		0.332189	0.827875	STD_ray05_center.czi	32.38	248.99		0.198769	0.566922
						C2-STD_RNAscope_bglap_msxb_GFP_1dpi_25102018.lif - Series008	13.51	269.61		0.682779	0.706117													STD_ray02_center.czi	48.94	336.48		0.377808	0.960385							STD_ray04_center.czi	87.44	66.45		0.36158	0.111751	STD_ray05_center.czi	55.89	276.1		0.493973	0.650605
						C2-STD_RNAscope_bglap_msxb_GFP_1dpi_25102018.lif - Series008	13.13	271.46		0.644512	0.711882													STD_ray02_center.czi	29.36	115.42		0.0496145	0.322092							STD_ray04_center.czi	76.74	265.96		0.267423	0.739437	STD_ray05_center.czi	46.63	288.15		0.3777	0.687801
						C2-STD_RNAscope_bglap_msxb_GFP_1dpi_25102018.lif - Series008	13.06	271.78		0.637462	0.712879													STD_ray02_center.czi	34.06	105.96		0.128394	0.294777							STD_ray04_center.czi	65.04	144.06		0.164467	0.355923	STD_ray05_center.czi	40.73	315.79		0.303616	0.77312
						C2-STD_RNAscope_bglap_msxb_GFP_1dpi_25102018.lif - Series008	13.39	272.02		0.670695	0.713627													STD_ray02_center.czi	58.13	308.39		0.531847	0.879277							STD_ray04_center.czi	98.02	216.09		0.454681	0.582539	STD_ray05_center.czi	96.19	297.06		1	0.715304
						C2-STD_RNAscope_bglap_msxb_GFP_1dpi_25102018.lif - Series008	13.97	272.15		0.729104	0.714032													STD_ray02_center.czi	33.47	74.08		0.118505	0.202726							STD_ray04_center.czi	54.01	52.71		0.0674058	0.0685229	STD_ray05_center.czi	53.15	318.43		0.459568	0.781269
						C2-STD_RNAscope_bglap_msxb_GFP_1dpi_25102018.lif - Series008	10.28	279.86		0.357503	0.738057													STD_ray02_center.czi	40.22	48.04		0.231646	0.127537							STD_ray04_center.czi	59.56	104.64		0.116244	0.231902	STD_ray05_center.czi	47.65	294.86		0.390507	0.708513
						C2-STD_RNAscope_bglap_msxb_GFP_1dpi_25102018.lif - Series008	10.45	280.26		0.374622	0.739304													STD_ray02_center.czi	29.65	98.16		0.0544754	0.272255							STD_ray04_center.czi	67.72	127.75		0.18805	0.304609	STD_ray05_center.czi	61.04	316.49		0.558639	0.775281
						C2-STD_RNAscope_bglap_msxb_GFP_1dpi_25102018.lif - Series008	13.12	287.48		0.643505	0.761802													STD_ray02_center.czi	47.98	222.99		0.361716	0.632691							STD_ray04_center.czi	54.8	154.65		0.0743576	0.38924
						C2-STD_RNAscope_bglap_msxb_GFP_1dpi_25102018.lif - Series008	13.33	295.27		0.664653	0.786077													STD_ray02_center.czi	34.11	260.64		0.129232	0.741403							STD_ray04_center.czi	51.18	106.25		0.0425026	0.236967
						C2-STD_RNAscope_bglap_msxb_GFP_1dpi_25102018.lif - Series008	12.76	299.24		0.607251	0.798448													STD_ray02_center.czi	38.42	202.97		0.201475	0.574885							STD_ray04_center.czi	51	36.82		0.0409187	0.0185308
						C2-STD_RNAscope_bglap_msxb_GFP_1dpi_25102018.lif - Series008	12.98	307.42		0.629406	0.823938													STD_ray02_center.czi	27.74	131.41		0.0224606	0.368261							STD_ray04_center.czi	89.7	71.31		0.381468	0.127041
						C2-STD_RNAscope_bglap_msxb_GFP_1dpi_25102018.lif - Series008	11.24	308.39		0.454179	0.826961													STD_ray02_center.czi	29.87	186.28		0.0581629	0.526694							STD_ray04_center.czi	57.13	115.01		0.094861	0.264527
						C2-STD_RNAscope_bglap_msxb_GFP_1dpi_25102018.lif - Series008	15.45	309.6		0.878147	0.830731													STD_ray02_center.czi	28.29	195.8		0.0316795	0.554182							STD_ray04_center.czi	53.53	237.67		0.063182	0.650433
						C2-STD_RNAscope_bglap_msxb_GFP_1dpi_25102018.lif - Series008	12.98	311.85		0.629406	0.837743													STD_ray02_center.czi	40.76	93.39		0.240697	0.258482							STD_ray04_center.czi	82.67	119.99		0.319606	0.280195
						C2-STD_RNAscope_bglap_msxb_GFP_1dpi_25102018.lif - Series008	15.6	317.79		0.893253	0.856253													STD_ray02_center.czi	33.22	143.1		0.114314	0.402015							STD_ray04_center.czi	68.94	173.53		0.198786	0.448639
						C2-STD_RNAscope_bglap_msxb_GFP_1dpi_25102018.lif - Series008	9.06	318.33		0.234642	0.857935													STD_ray02_center.czi	32	61.8		0.0938652	0.167268							STD_ray04_center.czi	80.39	100.66		0.299542	0.21938
						C2-STD_RNAscope_bglap_msxb_GFP_1dpi_25102018.lif - Series008	16.43	319.79		0.976838	0.862485													STD_ray02_center.czi	34.8	75.67		0.140798	0.207317							STD_ray04_center.czi	54.5	148.93		0.0717177	0.371244
						C2-STD_RNAscope_bglap_msxb_GFP_1dpi_25102018.lif - Series008	8.4	324.3		0.168177	0.876539													STD_ray02_center.czi	33.47	87.26		0.118505	0.240782							STD_ray04_center.czi	62.39	136.36		0.141147	0.331697
						C2-STD_RNAscope_bglap_msxb_GFP_1dpi_25102018.lif - Series008	9.44	329.81		0.27291	0.893709													STD_ray02_center.czi	39.67	54.41		0.222427	0.14593							STD_ray04_center.czi	68.61	153.93		0.195882	0.386975
						C2-STD_RNAscope_bglap_msxb_GFP_1dpi_25102018.lif - Series008	8.24	329.81		0.152064	0.893709													STD_ray02_center.czi	35.02	311.16		0.144485	0.887275							STD_ray04_center.czi	127.59	61.47		0.714889	0.0960831
						C2-STD_RNAscope_bglap_msxb_GFP_1dpi_25102018.lif - Series008	15.22	330.17		0.854985	0.89483													STD_ray02_center.czi	54.63	348.63		0.473181	0.995467							STD_ray04_center.czi	58.99	68.22		0.111228	0.117319
						C2-STD_RNAscope_bglap_msxb_GFP_1dpi_25102018.lif - Series008	7.28	334.31		0.0553877	0.907731													STD_ray02_center.czi	32.82	111.59		0.10761	0.311033							STD_ray04_center.czi	57.99	144.57		0.102429	0.357527
						C2-STD_RNAscope_bglap_msxb_GFP_1dpi_25102018.lif - Series008	10.27	339.07		0.356495	0.922564													STD_ray02_center.czi	44.37	19.92		0.301207	0.0463431							STD_ray04_center.czi	48.44	49.72		0.0183914	0.0591159
						C2-STD_RNAscope_bglap_msxb_GFP_1dpi_25102018.lif - Series008	8.06	342.73		0.133938	0.933969													STD_ray02_center.czi	39.88	174.56		0.225947	0.492854
						C2-STD_RNAscope_bglap_msxb_GFP_1dpi_25102018.lif - Series008	10.39	344.43		0.36858	0.939266													STD_ray02_center.czi	26.4	286.42		0	0.81584
						C2-STD_RNAscope_bglap_msxb_GFP_1dpi_25102018.lif - Series008	10.24	350.45		0.353474	0.958026													STD_ray02_center.czi	36.67	76.67		0.172142	0.210204
						C2-STD_RNAscope_bglap_msxb_GFP_1dpi_25102018.lif - Series008	9.72	351.85		0.301108	0.962388													STD_ray02_center.czi	43.03	154.53		0.278746	0.435019
						C2-STD_RNAscope_bglap_msxb_GFP_1dpi_25102018.lif - Series008	8.86	355.29		0.214502	0.973108													STD_ray02_center.czi	27.78	297.5		0.0231311	0.847833
						C2-STD_RNAscope_bglap_msxb_GFP_1dpi_25102018.lif - Series008	7.57	356.6		0.0845921	0.97719													STD_ray02_center.czi	46.08	44.48		0.329869	0.117258
						C2-STD_RNAscope_bglap_msxb_GFP_1dpi_25102018.lif - Series008	9.4	360.53		0.268882	0.989436													STD_ray02_center.czi	35.3	252.7		0.149179	0.718477
						C2-STD_RNAscope_bglap_msxb_GFP_1dpi_25102018.lif - Series008	10.3	363.92		0.359517	1													STD_ray02_center.czi	33.4	281.74		0.117332	0.802327
																								STD_ray02_center.czi	32.37	275.46		0.100067	0.784194
																								STD_ray02_center.czi	42.89	163.42		0.2764	0.460688
																								STD_ray02_center.czi	34.08	188.42		0.128729	0.532873
																								STD_ray02_center.czi	33.62	193.72		0.121019	0.548177
																								STD_ray02_center.czi	49.07	200.61		0.379987	0.568071
																								STD_ray02_center.czi	44.8	219.55		0.308414	0.622759
																								STD_ray02_center.czi	28.2	100.97		0.030171	0.280368
																								STD_ray02_center.czi	32.67	58.78		0.105096	0.158548
																								STD_ray02_center.czi	28.18	322.93		0.0298357	0.92126
																								STD_ray02_center.czi	42.63	76.44		0.272042	0.20954
																								STD_ray02_center.czi	27.52	329.26		0.018773	0.939537
																								STD_ray02_center.czi	37.89	49.41		0.192591	0.131493
																								STD_ray02_center.czi	26.94	265.26		0.00905129	0.754743
																								STD_ray02_center.czi	33.85	169.75		0.124874	0.478965
																								STD_ray02_center.czi	31.18	301.69		0.0801207	0.859931
																								STD_ray02_center.czi	30.69	332.19		0.0719075	0.947998
																								STD_ray02_center.czi	29.03	123.99		0.0440831	0.346837
																								STD_ray02_center.czi	40.44	155.86		0.235334	0.438859
																								STD_ray02_center.czi	57.7	110.96		0.52464	0.309214
																								STD_ray02_center.czi	29.41	334.74		0.0504526	0.95536
																								STD_ray02_center.czi	30.29	133.46		0.0652028	0.374181
																								STD_ray02_center.czi	43.66	28.69		0.289306	0.0716658
																								STD_ray02_center.czi	27.48	328.92		0.0181026	0.938556
																								STD_ray02_center.czi	30.52	9.91		0.069058	0.01744
																								STD_ray02_center.czi	45.47	38.47		0.319645	0.0999047
																								STD_ray02_center.czi	27.42	319.69		0.0170969	0.911905
																								STD_ray02_center.czi	51.69	76.98		0.423902	0.211099
																								STD_ray02_center.czi	31.01	99.27		0.0772712	0.27546
																								STD_ray02_center.czi	43.13	52.58		0.280422	0.140646
																								STD_ray02_center.czi	29.77	168.62		0.0564868	0.475702
																								STD_ray02_center.czi	29	198.3		0.0435803	0.561401
																								STD_ray02_center.czi	26.86	305.41		0.00771036	0.870672
																								STD_ray02_center.czi	39.01	178.53		0.211364	0.504317
																								STD_ray02_center.czi	34.36	186.48		0.133423	0.527272
																								STD_ray02_center.czi	32.08	141.76		0.0952062	0.398146
																								STD_ray02_center.czi	26.54	192.28		0.00234663	0.544019
																								STD_ray02_center.czi	41.59	107.73		0.254609	0.299887
																								STD_ray02_center.czi	29.02	81.23		0.0439155	0.223371
																								STD_ray02_center.czi	33.12	19.52		0.112638	0.0451881
																								STD_ray02_center.czi	41.51	183.35		0.253269	0.518234
																								STD_ray02_center.czi	30.88	253.61		0.0750922	0.721104
																								STD_ray02_center.czi	28.88	223.32		0.0415689	0.633644
																								STD_ray02_center.czi	34.5	211.61		0.135769	0.599833
																								STD_ray02_center.czi	57.39	70.63		0.519444	0.192764
																								STD_ray02_center.czi	46.46	275.38		0.336239	0.783963
																								STD_ray02_center.czi	30.69	144.3		0.0719075	0.40548
																								STD_ray02_center.czi	30.5	86.85		0.0687228	0.239598
																								STD_ray02_center.czi	39.49	43.2		0.21941	0.113562
																								STD_ray02_center.czi	35.07	330.15		0.145323	0.942107
																								STD_ray02_center.czi	32.78	145.66		0.106939	0.409407
																								STD_ray02_center.czi	41.41	110.83		0.251592	0.308838
																								STD_ray02_center.czi	86.04	7.13		0.999665	0.00941299
																								STD_ray02_center.czi	27.41	236.03		0.0169293	0.670343
																								STD_ray02_center.czi	28.39	58.27		0.0333557	0.157076
																								STD_ray02_center.czi	30.31	348.55		0.065538	0.995236
																								STD_ray02_center.czi	31.05	299.02		0.0779417	0.852222
																								STD_ray02_center.czi	79.6	46.4		0.89172	0.122802
																								STD_ray02_center.czi	50.77	25.57		0.408481	0.062657
																								STD_ray02_center.czi	29.8	335.55		0.0569896	0.957699
																								STD_ray02_center.czi	27.5	79.19		0.0184378	0.21748
																								STD_ray02_center.czi	28.7	146.55		0.0385518	0.411977
																								STD_ray02_center.czi	38.29	350.2		0.199296	1
																								STD_ray02_center.czi	31.96	74.32		0.0931948	0.203419
																								STD_ray02_center.czi	30.14	178.67		0.0626886	0.504721

## Sheet: Fig 6I
ray01	mean	XM	mean	mean scaled	XM scaled	ray02	mean	XM	mean	mean scaled	XM scaled	ray03	mean	XM	mean	mean scaled	XM scaled	ray04	mean	XM	mean	mean scaled	XM scaled	ray05	mean	XM	mean	mean scaled	XM scaled	ray06	mean	XM	mean	mean scaled	XM scaled	ray07	mean	XM	mean	mean scaled	XM scaled
STD_ray01_centre.czi	16.79	7.31	Min	0.0763395	0	STD_ray02_centre-1.czi	30.25	10.85	Min	0.23898	0	STD_ray03_centre.czi	41.68	140.32	Min	0.265746	0	STD_ray04_centre.czi	51.02	43.01	Min	0.33915	0	STD_ray05_centre.czi	21.56	22.18	Min	0.0327998	0	STD_ray06_centre.czi	18	13	Min	0	0	STD_ray07_centre.czi	33.49	28.72	Min	0.357537	0
STD_ray01_centre.czi	34.94	73.85	13.57	0.506638	0.114716	STD_ray02_centre-1.czi	31.1	28.22	12.25	0.250266	0.0349033	STD_ray03_centre.czi	32.86	142.07	17.25	0.169803	0.00417542	STD_ray04_centre.czi	74.4	53.66	20.7	0.600671	0.0327813	STD_ray05_centre.czi	48.15	23.53	18.65	0.332507	0.00544816	STD_ray06_centre.czi	23.6	24.93	18	0.122969	0.0248749	STD_ray07_centre.czi	26.42	30.44	16.01	0.212927	0.00508635
STD_ray01_centre.czi	26.37	131.94	Max	0.303461	0.214864	STD_ray02_centre-1.czi	58.41	35.44	Max	0.612852	0.0494112	STD_ray03_centre.czi	17.64	143.72	Max	0.00424236	0.00811224	STD_ray04_centre.czi	110.1	57.37	Max	1	0.0442009	STD_ray05_centre.czi	51.77	29.9	Max	0.373309	0.0311554	STD_ray06_centre.czi	20.49	37.94	Max	0.0546772	0.0520017	STD_ray07_centre.czi	22.84	38.18	Max	0.139701	0.0279749
STD_ray01_centre.czi	55.75	145	55.75	1	0.23738	STD_ray02_centre-1.czi	14.53	44.89	87.57	0.0302708	0.0684001	STD_ray03_centre.czi	34.1	152.13	109.18	0.183292	0.0281781	STD_ray04_centre.czi	25.82	69.15	110.1	0.0572707	0.0804605	STD_ray05_centre.czi	42.26	31.67	107.37	0.266118	0.0382986	STD_ray06_centre.czi	26.08	48.09	63.54	0.177426	0.0731651	STD_ray07_centre.czi	17.35	40.51	64.9	0.0274085	0.0348652
STD_ray01_centre.czi	40.81	174.16		0.645804	0.287653	STD_ray02_centre-1.czi	19.9	67.1		0.101567	0.113029	STD_ray03_centre.czi	48.75	152.65		0.342652	0.0294188	STD_ray04_centre.czi	30.63	73.15		0.111074	0.0927727	STD_ray05_centre.czi	73.91	42.71		0.622858	0.0828524	STD_ray06_centre.czi	31.93	55.87		0.305885	0.089387	STD_ray07_centre.czi	31.07	47.5		0.308038	0.0555358
STD_ray01_centre.czi	51.56	191.78		0.900664	0.31803	STD_ray02_centre-1.czi	20.09	79.8		0.104089	0.138548	STD_ray03_centre.czi	27.54	153.07		0.111933	0.0304209	STD_ray04_centre.czi	71.28	74.05		0.565772	0.095543	STD_ray05_centre.czi	35.72	59.64		0.192403	0.151176	STD_ray06_centre.czi	19.5	60.08		0.0329381	0.0981651	STD_ray07_centre.czi	45.77	51.19		0.608713	0.0664478
STD_ray01_centre.czi	29.67	219.44		0.381697	0.365716	STD_ray02_centre-1.czi	14.71	98.13		0.0326606	0.175381	STD_ray03_centre.czi	55.21	159.77		0.412923	0.0464068	STD_ray04_centre.czi	67.54	74.12		0.523937	0.0957584	STD_ray05_centre.czi	61.34	59.64		0.481177	0.151176	STD_ray06_centre.czi	18.28	65.89		0.00614844	0.110279	STD_ray07_centre.czi	33.38	52.79		0.355287	0.0711793
STD_ray01_centre.czi	22.8	232.2		0.218824	0.387715	STD_ray02_centre-1.czi	27.03	100.17		0.196229	0.17948	STD_ray03_centre.czi	25.76	159.99		0.0925704	0.0469317	STD_ray04_centre.czi	24.19	80.02		0.039038	0.113919	STD_ray05_centre.czi	23	65.76		0.0490307	0.175875	STD_ray06_centre.czi	23.2	66.44		0.114185	0.111426	STD_ray07_centre.czi	23.11	56.22		0.145224	0.0813225
STD_ray01_centre.czi	26.38	240.72		0.303698	0.402403	STD_ray02_centre-1.czi	22.33	106.5		0.133829	0.192199	STD_ray03_centre.czi	44.94	170.84		0.301207	0.0728192	STD_ray04_centre.czi	30.57	85.99		0.110403	0.132295	STD_ray05_centre.czi	24.29	66.79		0.0635708	0.180031	STD_ray06_centre.czi	21.48	71.5		0.0764163	0.121977	STD_ray07_centre.czi	35.24	57.15		0.393332	0.0840726
STD_ray01_centre.czi	28.03	277.03		0.342817	0.465002	STD_ray02_centre-1.czi	14.57	106.57		0.0308019	0.19234	STD_ray03_centre.czi	27.82	185.37		0.114979	0.107487	STD_ray04_centre.czi	28.53	90.1		0.0875839	0.144946	STD_ray05_centre.czi	22.08	73.89		0.038661	0.208685	STD_ray06_centre.czi	20.68	75.97		0.0588494	0.131297	STD_ray07_centre.czi	17.32	57.23		0.0267948	0.0843092
STD_ray01_centre.czi	22.11	312.66		0.202466	0.526429	STD_ray02_centre-1.czi	41.77	112.86		0.391928	0.204979	STD_ray03_centre.czi	33.32	197.65		0.174807	0.136787	STD_ray04_centre.czi	27.18	91.57		0.0724832	0.149471	STD_ray05_centre.czi	88.17	78.36		0.783589	0.226724	STD_ray06_centre.czi	29.49	78.36		0.252306	0.13628	STD_ray07_centre.czi	24.3	64		0.169564	0.104329
STD_ray01_centre.czi	22.5	312.75		0.211712	0.526584	STD_ray02_centre-1.czi	20.18	121.31		0.105284	0.221959	STD_ray03_centre.czi	28.24	198.77		0.119547	0.139459	STD_ray04_centre.czi	41.95	92.01		0.237696	0.150825	STD_ray05_centre.czi	31.16	78.77		0.141005	0.228379	STD_ray06_centre.czi	27.38	89.63		0.205973	0.159779	STD_ray07_centre.czi	44.11	64.49		0.57476	0.105778
STD_ray01_centre.czi	19.95	336.73		0.151257	0.567926	STD_ray02_centre-1.czi	18.15	126.81		0.0783324	0.23301	STD_ray03_centre.czi	28.33	213.24		0.120526	0.173984	STD_ray04_centre.czi	56.06	93.06		0.395526	0.154057	STD_ray05_centre.czi	57.73	82.49		0.440487	0.243392	STD_ray06_centre.czi	24.13	91.71		0.134607	0.164116	STD_ray07_centre.czi	31.83	66.39		0.323584	0.111397
STD_ray01_centre.czi	36.37	339.41		0.540541	0.572547	STD_ray02_centre-1.czi	23.31	130.79		0.14684	0.241008	STD_ray03_centre.czi	30.95	214.84		0.149026	0.177801	STD_ray04_centre.czi	34.87	101.82		0.158501	0.181021	STD_ray05_centre.czi	55.51	100.05		0.415464	0.314258	STD_ray06_centre.czi	32.52	102.46		0.318841	0.18653	STD_ray07_centre.czi	34.94	67.83		0.387196	0.115655
STD_ray01_centre.czi	17.45	360.31		0.0919867	0.608579	STD_ray02_centre-1.czi	29.54	140.21		0.229554	0.259937	STD_ray03_centre.czi	38.81	231.75		0.234526	0.218148	STD_ray04_centre.czi	29.43	103.6		0.097651	0.1865	STD_ray05_centre.czi	77.06	105.67		0.658363	0.336939	STD_ray06_centre.czi	21.39	102.52		0.0744401	0.186656	STD_ray07_centre.czi	20.79	68.7		0.0977705	0.118228
STD_ray01_centre.czi	18.09	366.91		0.10716	0.619957	STD_ray02_centre-1.czi	39.95	158		0.367764	0.295684	STD_ray03_centre.czi	21.52	232.02		0.0464484	0.218792	STD_ray04_centre.czi	35.13	104.75		0.161409	0.190039	STD_ray05_centre.czi	38.84	107.81		0.22757	0.345575	STD_ray06_centre.czi	38.37	102.59		0.447299	0.186802	STD_ray07_centre.czi	35.81	72.85		0.404991	0.1305
STD_ray01_centre.czi	15.72	366.95		0.050972	0.620026	STD_ray02_centre-1.czi	24.16	176.48		0.158125	0.332818	STD_ray03_centre.czi	35.09	232.03		0.194061	0.218816	STD_ray04_centre.czi	65.11	106.54		0.496756	0.195549	STD_ray05_centre.czi	48.5	120.46		0.336452	0.396626	STD_ray06_centre.czi	22.24	109.14		0.093105	0.200459	STD_ray07_centre.czi	31.86	74.12		0.324197	0.134256
STD_ray01_centre.czi	16.93	369.23		0.0796586	0.623957	STD_ray02_centre-1.czi	19.26	177.27		0.0930696	0.334405	STD_ray03_centre.czi	34.59	236.15		0.188622	0.228646	STD_ray04_centre.czi	27.12	107.67		0.0718121	0.199027	STD_ray05_centre.czi	18.65	122.8		0	0.40607	STD_ray06_centre.czi	33.83	111.26		0.347606	0.204879	STD_ray07_centre.czi	32.91	74.83		0.345674	0.136356
STD_ray01_centre.czi	16.63	380.96		0.0725462	0.64418	STD_ray02_centre-1.czi	26.17	181.47		0.184811	0.342845	STD_ray03_centre.czi	21.32	250.43		0.0442728	0.262717	STD_ray04_centre.czi	48.75	112.82		0.313758	0.214879	STD_ray05_centre.czi	23.53	123.45		0.0550045	0.408693	STD_ray06_centre.czi	38.37	112.12		0.447299	0.206672	STD_ray07_centre.czi	30.43	78.95		0.294948	0.148539
STD_ray01_centre.czi	22.06	386.99		0.20128	0.654576	STD_ray02_centre-1.czi	24.81	181.76		0.166755	0.343427	STD_ray03_centre.czi	32.86	252		0.169803	0.266463	STD_ray04_centre.czi	51.59	115.25		0.345526	0.222359	STD_ray05_centre.czi	21.86	128.89		0.0361812	0.430647	STD_ray06_centre.czi	28.96	119.47		0.240668	0.221997	STD_ray07_centre.czi	19.76	79.26		0.0767028	0.149456
STD_ray01_centre.czi	16.28	393.15		0.0642485	0.665196	STD_ray02_centre-1.czi	16.34	192.8		0.0543016	0.365611	STD_ray03_centre.czi	18.03	254.58		0.00848472	0.272619	STD_ray04_centre.czi	27.83	116.6		0.0797539	0.226514	STD_ray05_centre.czi	45.67	132.16		0.304554	0.443844	STD_ray06_centre.czi	29.64	123.43		0.255599	0.230254	STD_ray07_centre.czi	31.36	80.01		0.31397	0.151674
STD_ray01_centre.czi	19.59	402.73		0.142722	0.681712	STD_ray02_centre-1.czi	22.38	192.9		0.134493	0.365812	STD_ray03_centre.czi	34.17	259.52		0.184053	0.284405	STD_ray04_centre.czi	21.51	117		0.0090604	0.227746	STD_ray05_centre.czi	26.52	132.41		0.088706	0.444852	STD_ray06_centre.czi	22.99	126.64		0.109574	0.236947	STD_ray07_centre.czi	28.89	80.54		0.263449	0.153241
STD_ray01_centre.czi	20.59	408.94		0.16643	0.692418	STD_ray02_centre-1.czi	35.07	193.01		0.302974	0.366033	STD_ray03_centre.czi	25.91	260.49		0.0942021	0.28672	STD_ray04_centre.czi	57.59	119.93		0.41264	0.236764	STD_ray05_centre.czi	27.02	142.04		0.0943417	0.483716	STD_ray06_centre.czi	31.21	131.22		0.290075	0.246497	STD_ray07_centre.czi	25.38	85.1		0.191655	0.166726
STD_ray01_centre.czi	27.66	412.86		0.334045	0.699176	STD_ray02_centre-1.czi	12.25	208.04		0	0.396234	STD_ray03_centre.czi	29.55	277.38		0.133797	0.327019	STD_ray04_centre.czi	32.24	123.59		0.129083	0.24803	STD_ray05_centre.czi	84.45	143.2		0.741659	0.488397	STD_ray06_centre.czi	24.25	147.84		0.137242	0.281151	STD_ray07_centre.czi	23.9	89.74		0.161383	0.180447
STD_ray01_centre.czi	20.26	445.41		0.158606	0.755293	STD_ray02_centre-1.czi	39.62	213.08		0.363383	0.406362	STD_ray03_centre.czi	26.42	286		0.0997498	0.347585	STD_ray04_centre.czi	40.95	124.1		0.22651	0.2496	STD_ray05_centre.czi	22.72	147.01		0.0458747	0.503773	STD_ray06_centre.czi	26.29	148.32		0.182038	0.282152	STD_ray07_centre.czi	37.43	90.96		0.438126	0.184055
STD_ray01_centre.czi	28.4	446.14		0.351588	0.756551	STD_ray02_centre-1.czi	47.55	214.9		0.468667	0.410019	STD_ray03_centre.czi	40.89	292.73		0.257152	0.363643	STD_ray04_centre.czi	67.33	126.63		0.521588	0.257387	STD_ray05_centre.czi	107.37	155.93		1	0.539772	STD_ray06_centre.czi	23.17	149.65		0.113527	0.284925	STD_ray07_centre.czi	36.78	92.26		0.424831	0.187899
STD_ray01_centre.czi	13.57	482.47		0	0.819185	STD_ray02_centre-1.czi	42.62	222.22		0.403213	0.424728	STD_ray03_centre.czi	44	316.14		0.290982	0.419498	STD_ray04_centre.czi	34.05	129.39		0.149329	0.265883	STD_ray05_centre.czi	23.01	156.59		0.0491434	0.542435	STD_ray06_centre.czi	43.42	153.08		0.558191	0.292077	STD_ray07_centre.czi	31.61	92.79		0.319084	0.189467
STD_ray01_centre.czi	17.16	493.49		0.0851114	0.838184	STD_ray02_centre-1.czi	20.1	233.06		0.104222	0.44651	STD_ray03_centre.czi	28.89	323.07		0.126618	0.436033	STD_ray04_centre.czi	24.44	129.81		0.0418345	0.267176	STD_ray05_centre.czi	28.69	164.34		0.113165	0.573712	STD_ray06_centre.czi	19.96	157.49		0.0430391	0.301272	STD_ray07_centre.czi	33.44	95.2		0.356515	0.196593
STD_ray01_centre.czi	17.14	497.95		0.0846373	0.845873	STD_ray02_centre-1.czi	55.3	260.76		0.571561	0.50217	STD_ray03_centre.czi	19.75	325.05		0.0271946	0.440757	STD_ray04_centre.czi	26.73	137.81		0.0674497	0.2918	STD_ray05_centre.czi	46.99	174.93		0.319432	0.616449	STD_ray06_centre.czi	23.15	160.07		0.113087	0.306651	STD_ray07_centre.czi	53.52	101.19		0.767233	0.214307
STD_ray01_centre.czi	21.25	518.95		0.182077	0.882077	STD_ray02_centre-1.czi	15.02	267.89		0.0367764	0.516497	STD_ray03_centre.czi	25.7	331.1		0.0919178	0.455192	STD_ray04_centre.czi	49.61	139.35		0.323378	0.29654	STD_ray05_centre.czi	58.29	175.85		0.446799	0.620162	STD_ray06_centre.czi	32.81	171.26		0.325209	0.329983	STD_ray07_centre.czi	32.27	109.99		0.332583	0.24033
STD_ray01_centre.czi	34.77	519.61		0.502608	0.883215	STD_ray02_centre-1.czi	28.17	269.33		0.211365	0.519391	STD_ray03_centre.czi	34.06	340.16		0.182857	0.476809	STD_ray04_centre.czi	21.96	144.08		0.014094	0.311099	STD_ray05_centre.czi	22.03	176.83		0.0380974	0.624117	STD_ray06_centre.czi	24.62	176.84		0.145367	0.341618	STD_ray07_centre.czi	33.63	111.64		0.360401	0.245209
STD_ray01_centre.czi	30.44	521		0.399953	0.885611	STD_ray02_centre-1.czi	16.46	295		0.0558948	0.570972	STD_ray03_centre.czi	28.42	340.28		0.121505	0.477095	STD_ray04_centre.czi	40.82	160.44		0.225056	0.361457	STD_ray05_centre.czi	37.62	209.84		0.213819	0.757335	STD_ray06_centre.czi	32.02	181.54		0.307861	0.351418	STD_ray07_centre.czi	21.32	117.97		0.108611	0.263928
STD_ray01_centre.czi	17.12	540.33		0.0841631	0.918937	STD_ray02_centre-1.czi	20.35	309.68		0.107541	0.60047	STD_ray03_centre.czi	33.27	355.68		0.174263	0.513839	STD_ray04_centre.czi	54.2	161.59		0.37472	0.364996	STD_ray05_centre.czi	41.76	210.3		0.260482	0.759191	STD_ray06_centre.czi	31.94	186.16		0.306105	0.361051	STD_ray07_centre.czi	35.36	118.42		0.395786	0.265259
STD_ray01_centre.czi	16.11	544.32		0.0602181	0.925815	STD_ray02_centre-1.czi	18.34	318.66		0.080855	0.618515	STD_ray03_centre.czi	30.3	361.61		0.141956	0.527987	STD_ray04_centre.czi	61.64	162.65		0.457942	0.368259	STD_ray05_centre.czi	40.5	211.18		0.24628	0.762743	STD_ray06_centre.czi	21.44	188.5		0.075538	0.36593	STD_ray07_centre.czi	28.61	119.61		0.257721	0.268778
STD_ray01_centre.czi	14.49	550.36		0.0218113	0.936229	STD_ray02_centre-1.czi	30.44	319.45		0.241503	0.620102	STD_ray03_centre.czi	64.72	363.24		0.516371	0.531876	STD_ray04_centre.czi	79.14	166.67		0.653691	0.380633	STD_ray05_centre.czi	67.42	214.9		0.549707	0.777755	STD_ray06_centre.czi	30.51	188.96		0.274704	0.366889	STD_ray07_centre.czi	53.54	124.07		0.767642	0.281967
STD_ray01_centre.czi	17.77	557.61		0.0995733	0.948728	STD_ray02_centre-1.czi	31.11	319.9		0.250398	0.621006	STD_ray03_centre.czi	33.33	375.55		0.174916	0.561247	STD_ray04_centre.czi	34.02	171.3		0.148993	0.394884	STD_ray05_centre.czi	64.31	226.7		0.514653	0.825376	STD_ray06_centre.czi	33.35	202.37		0.337066	0.39485	STD_ray07_centre.czi	38.48	125.05		0.459603	0.284865
STD_ray01_centre.czi	15.39	562.22		0.0431484	0.956675	STD_ray02_centre-1.czi	21.57	333.11		0.123739	0.647551	STD_ray03_centre.czi	31.24	379.14		0.152181	0.569813	STD_ray04_centre.czi	33.01	172.05		0.137696	0.397193	STD_ray05_centre.czi	65.76	228.77		0.530996	0.83373	STD_ray06_centre.czi	40.61	206.12		0.496487	0.402669	STD_ray07_centre.czi	37.8	127.09		0.445694	0.290898
STD_ray01_centre.czi	15.76	563.14		0.0519203	0.958261	STD_ray02_centre-1.czi	87.57	342.2		1	0.665816	STD_ray03_centre.czi	48.82	383.29		0.343413	0.579715	STD_ray04_centre.czi	25.08	182.99		0.0489933	0.430867	STD_ray05_centre.czi	42.3	229.73		0.266569	0.837604	STD_ray06_centre.czi	38.67	211.51		0.453887	0.413907	STD_ray07_centre.czi	34.87	127.17		0.385764	0.291134
STD_ray01_centre.czi	17.57	569.83		0.0948317	0.969795	STD_ray02_centre-1.czi	26.96	345.47		0.1953	0.672387	STD_ray03_centre.czi	26.58	397.25		0.10149	0.613023	STD_ray04_centre.czi	26.88	185.19		0.0691275	0.437639	STD_ray05_centre.czi	69.62	238.81		0.574504	0.874248	STD_ray06_centre.czi	32.74	212.06		0.323671	0.415054	STD_ray07_centre.czi	41.65	134.21		0.524443	0.311953
STD_ray01_centre.czi	19.59	580.83		0.142722	0.988759	STD_ray02_centre-1.czi	24.53	352.58		0.163038	0.686674	STD_ray03_centre.czi	19.29	402.95		0.0221908	0.626622	STD_ray04_centre.czi	48.6	186.47		0.312081	0.441578	STD_ray05_centre.czi	31.6	250.13		0.145965	0.919932	STD_ray06_centre.czi	24.76	221.44		0.148441	0.434612	STD_ray07_centre.czi	29.59	135.6		0.277766	0.316063
STD_ray01_centre.czi	34.23	583.35		0.489806	0.993104	STD_ray02_centre-1.czi	28.46	371.84		0.215215	0.725375	STD_ray03_centre.czi	35.88	406.57		0.202654	0.63526	STD_ray04_centre.czi	26.1	193.46		0.0604027	0.463094	STD_ray05_centre.czi	20.96	269.97		0.026037	1	STD_ray06_centre.czi	26.15	222.7		0.178964	0.437239	STD_ray07_centre.czi	16.84	137.51		0.0169769	0.321712
STD_ray01_centre.czi	15.66	587.35		0.0495495	1	STD_ray02_centre-1.czi	38.45	377.23		0.347849	0.736205	STD_ray03_centre.czi	44	409.34		0.290982	0.641869	STD_ray04_centre.czi	31.6	196.61		0.121924	0.47279							STD_ray06_centre.czi	34.22	226.74		0.35617	0.445663	STD_ray07_centre.czi	26.18	137.84		0.208018	0.322687
						STD_ray02_centre-1.czi	19.96	377.26		0.102363	0.736266	STD_ray03_centre.czi	21.97	432.48		0.0513434	0.69708	STD_ray04_centre.czi	60.58	211.42		0.446085	0.518376							STD_ray06_centre.czi	29.74	229.85		0.257795	0.452148	STD_ray07_centre.czi	17.24	140.85		0.0251585	0.331589
						STD_ray02_centre-1.czi	49.35	387.95		0.492565	0.757746	STD_ray03_centre.czi	18.88	432.71		0.0177309	0.697628	STD_ray04_centre.czi	68.47	213.37		0.53434	0.524378							STD_ray06_centre.czi	43.57	230.28		0.561484	0.453044	STD_ray07_centre.czi	19.08	141.78		0.062794	0.334339
						STD_ray02_centre-1.czi	31.94	420.73		0.261418	0.823615	STD_ray03_centre.czi	17.25	434.01		0	0.70073	STD_ray04_centre.czi	41.66	214.87		0.234452	0.528995							STD_ray06_centre.czi	32.44	234.44		0.317084	0.461718	STD_ray07_centre.czi	23.34	142.03		0.149928	0.335078
						STD_ray02_centre-1.czi	22.91	427.36		0.141529	0.836937	STD_ray03_centre.czi	19.69	435.6		0.0265419	0.704524	STD_ray04_centre.czi	24.41	226.61		0.0414989	0.565132							STD_ray06_centre.czi	25.92	239.04		0.173913	0.471309	STD_ray07_centre.czi	22.17	144.58		0.125997	0.342619
						STD_ray02_centre-1.czi	27.44	435.29		0.201673	0.852871	STD_ray03_centre.czi	21.85	436.45		0.0500381	0.706552	STD_ray04_centre.czi	61.03	233.3		0.451119	0.585724							STD_ray06_centre.czi	41.5	242.4		0.51603	0.478315	STD_ray07_centre.czi	25.85	145.54		0.201268	0.345458
						STD_ray02_centre-1.czi	62.38	474.08		0.66556	0.930816	STD_ray03_centre.czi	24.64	437.84		0.0803873	0.709868	STD_ray04_centre.czi	23.88	237.18		0.0355705	0.597667							STD_ray06_centre.czi	54.54	246.92		0.802372	0.48774	STD_ray07_centre.czi	16.01	152.42		0	0.365803
						STD_ray02_centre-1.czi	40	479.87		0.368428	0.942451	STD_ray03_centre.czi	18.28	445.68		0.0112042	0.728574	STD_ray04_centre.czi	23.3	238.12		0.0290828	0.60056							STD_ray06_centre.czi	26.38	251.78		0.184014	0.497873	STD_ray07_centre.czi	30.49	164.07		0.296175	0.400254
						STD_ray02_centre-1.czi	48.15	480.19		0.476633	0.943094	STD_ray03_centre.czi	30.48	451.02		0.143914	0.741315	STD_ray04_centre.czi	82.99	239.33		0.696756	0.604285							STD_ray06_centre.czi	29.19	253.01		0.245718	0.500438	STD_ray07_centre.czi	19.41	168.3		0.0695439	0.412763
						STD_ray02_centre-1.czi	21.64	497.19		0.124668	0.977254	STD_ray03_centre.czi	33.72	464.95		0.179158	0.774551	STD_ray04_centre.czi	57.16	239.97		0.40783	0.606255							STD_ray06_centre.czi	30.1	260.2		0.2657	0.51543	STD_ray07_centre.czi	33.91	171.49		0.366128	0.422197
						STD_ray02_centre-1.czi	32.83	508.51		0.273234	1	STD_ray03_centre.czi	109.18	559.44		1	1	STD_ray04_centre.czi	69.03	239.99		0.540604	0.606316							STD_ray06_centre.czi	24.11	261.64		0.134168	0.518432	STD_ray07_centre.czi	27.59	178.29		0.236858	0.442305
																		STD_ray04_centre.czi	77.77	241.01		0.638367	0.609456							STD_ray06_centre.czi	23.8	265		0.127361	0.525438	STD_ray07_centre.czi	35.36	178.69		0.395786	0.443488
																		STD_ray04_centre.czi	32.32	254.71		0.129978	0.651625							STD_ray06_centre.czi	49.33	266.7		0.687967	0.528982	STD_ray07_centre.czi	36.19	183.74		0.412763	0.458422
																		STD_ray04_centre.czi	38.01	261.25		0.193624	0.671756							STD_ray06_centre.czi	21.87	268.98		0.0849802	0.533736	STD_ray07_centre.czi	37.66	187.55		0.442831	0.469689
																		STD_ray04_centre.czi	36.57	262.5		0.177517	0.675603							STD_ray06_centre.czi	22.46	270.22		0.0979359	0.536322	STD_ray07_centre.czi	53.8	187.58		0.77296	0.469778
																		STD_ray04_centre.czi	60.18	264.94		0.441611	0.683114							STD_ray06_centre.czi	23.27	275.11		0.115722	0.546518	STD_ray07_centre.czi	24.98	190.71		0.183473	0.479034
																		STD_ray04_centre.czi	21.33	265.81		0.00704698	0.685792							STD_ray06_centre.czi	22.87	276.4		0.106939	0.549208	STD_ray07_centre.czi	46.81	195.44		0.629986	0.493021
																		STD_ray04_centre.czi	49.13	272.15		0.318009	0.705307							STD_ray06_centre.czi	60.16	280.06		0.92578	0.556839	STD_ray07_centre.czi	27.32	195.84		0.231336	0.494204
																		STD_ray04_centre.czi	24.33	272.73		0.040604	0.707092							STD_ray06_centre.czi	22.06	281.29		0.0891524	0.559404	STD_ray07_centre.czi	23.44	200.7		0.151974	0.508576
																		STD_ray04_centre.czi	75.03	273.31		0.607718	0.708877							STD_ray06_centre.czi	49.62	282.13		0.694335	0.561155	STD_ray07_centre.czi	16.98	206.37		0.0198405	0.525343
																		STD_ray04_centre.czi	24.35	276.35		0.0408277	0.718234							STD_ray06_centre.czi	21.24	285.2		0.0711462	0.567556	STD_ray07_centre.czi	26.08	208.11		0.205973	0.530489
																		STD_ray04_centre.czi	55.87	287.5		0.3934	0.752555							STD_ray06_centre.czi	23.28	298.53		0.115942	0.59535	STD_ray07_centre.czi	17.79	210.24		0.0364083	0.536787
																		STD_ray04_centre.czi	20.7	287.84		0	0.753601							STD_ray06_centre.czi	21.88	304.33		0.0851998	0.607444	STD_ray07_centre.czi	17.26	212.96		0.0255676	0.544831
																		STD_ray04_centre.czi	58.77	288.07		0.425839	0.754309							STD_ray06_centre.czi	27.2	307.19		0.20202	0.613407	STD_ray07_centre.czi	28.52	215.18		0.255881	0.551396
																		STD_ray04_centre.czi	34.61	294.34		0.155593	0.773609							STD_ray06_centre.czi	25.99	311.98		0.17545	0.623394	STD_ray07_centre.czi	21.26	226.48		0.107384	0.584812
																		STD_ray04_centre.czi	67.08	294.7		0.518792	0.774717							STD_ray06_centre.czi	25.7	314.39		0.169082	0.62842	STD_ray07_centre.czi	39.93	229.29		0.489262	0.593122
																		STD_ray04_centre.czi	54.88	296.4		0.382327	0.77995							STD_ray06_centre.czi	32.82	317.18		0.325428	0.634237	STD_ray07_centre.czi	21.51	230.94		0.112497	0.598001
																		STD_ray04_centre.czi	34.24	299.35		0.151454	0.78903							STD_ray06_centre.czi	32.51	325.05		0.318621	0.650646	STD_ray07_centre.czi	27.62	243.14		0.237472	0.634079
																		STD_ray04_centre.czi	53.09	299.55		0.362304	0.789645							STD_ray06_centre.czi	31.22	329.15		0.290294	0.659195	STD_ray07_centre.czi	28.25	248.79		0.250358	0.650787
																		STD_ray04_centre.czi	26.37	301.36		0.0634228	0.795217							STD_ray06_centre.czi	28.1	338.5		0.221783	0.678691	STD_ray07_centre.czi	19.39	251.36		0.0691348	0.658387
																		STD_ray04_centre.czi	62.11	303.12		0.463199	0.800634							STD_ray06_centre.czi	32.96	344.71		0.328502	0.691639	STD_ray07_centre.czi	49.61	251.44		0.687257	0.658623
																		STD_ray04_centre.czi	37.53	306.67		0.188255	0.811561							STD_ray06_centre.czi	26.12	346.53		0.178305	0.695434	STD_ray07_centre.czi	27.68	258.77		0.238699	0.680299
																		STD_ray04_centre.czi	23.33	307.97		0.0294183	0.815563							STD_ray06_centre.czi	44.53	349.59		0.582565	0.701814	STD_ray07_centre.czi	30.97	260.45		0.305993	0.685267
																		STD_ray04_centre.czi	36.48	310.54		0.17651	0.823473							STD_ray06_centre.czi	44.2	351.36		0.575318	0.705505	STD_ray07_centre.czi	27.46	263.32		0.234199	0.693754
																		STD_ray04_centre.czi	45.06	314.48		0.272483	0.835601							STD_ray06_centre.czi	35.83	359.5		0.391524	0.722477	STD_ray07_centre.czi	27.98	265.76		0.244835	0.70097
																		STD_ray04_centre.czi	24.56	326.24		0.0431767	0.871799							STD_ray06_centre.czi	29.71	364.6		0.257137	0.733111	STD_ray07_centre.czi	38.29	268.88		0.455717	0.710196
																		STD_ray04_centre.czi	60.32	330.01		0.443177	0.883403							STD_ray06_centre.czi	29.92	364.98		0.261748	0.733903	STD_ray07_centre.czi	38.63	271.37		0.462671	0.71756
																		STD_ray04_centre.czi	82.93	330.7		0.696085	0.885527							STD_ray06_centre.czi	51.02	370.39		0.725077	0.745183	STD_ray07_centre.czi	37.3	271.57		0.435467	0.718151
																		STD_ray04_centre.czi	55.97	333.41		0.394519	0.893869							STD_ray06_centre.czi	29.69	373.55		0.256697	0.751772	STD_ray07_centre.czi	20.98	274.47		0.101657	0.726727
																		STD_ray04_centre.czi	54.82	333.84		0.381655	0.895192							STD_ray06_centre.czi	25.65	377.47		0.167984	0.759946	STD_ray07_centre.czi	18.75	276.78		0.0560442	0.733558
																		STD_ray04_centre.czi	46.32	337.96		0.286577	0.907874							STD_ray06_centre.czi	48.28	386.05		0.66491	0.777836	STD_ray07_centre.czi	20.97	278.84		0.101452	0.73965
																		STD_ray04_centre.czi	95.04	340.91		0.831544	0.916954							STD_ray06_centre.czi	30.8	387.14		0.281072	0.780108	STD_ray07_centre.czi	27.58	281.02		0.236654	0.746097
																		STD_ray04_centre.czi	54.12	347.53		0.373826	0.937331							STD_ray06_centre.czi	35.98	388.31		0.394818	0.782548	STD_ray07_centre.czi	20.22	282.68		0.0861117	0.751005
																		STD_ray04_centre.czi	57.89	349.41		0.415996	0.943117							STD_ray06_centre.czi	28.82	388.69		0.237593	0.78334	STD_ray07_centre.czi	26.68	284.21		0.218245	0.75553
																		STD_ray04_centre.czi	48.85	349.81		0.314877	0.944349							STD_ray06_centre.czi	44.41	393.1		0.57993	0.792535	STD_ray07_centre.czi	24.01	284.28		0.163633	0.755737
																		STD_ray04_centre.czi	27.57	351.43		0.0768456	0.949335							STD_ray06_centre.czi	30.23	395.61		0.268555	0.797769	STD_ray07_centre.czi	28.42	287.12		0.253835	0.764135
																		STD_ray04_centre.czi	29.8	352.01		0.10179	0.95112							STD_ray06_centre.czi	63.54	399.9		1	0.806714	STD_ray07_centre.czi	29.69	291.66		0.279812	0.777561
																		STD_ray04_centre.czi	71.57	360.09		0.569016	0.975991							STD_ray06_centre.czi	29.05	407.92		0.242644	0.823436	STD_ray07_centre.czi	45.22	304.03		0.597464	0.814141
																		STD_ray04_centre.czi	26.84	366.77		0.0686801	0.996553							STD_ray06_centre.czi	25.77	407.97		0.170619	0.82354	STD_ray07_centre.czi	19.62	305.92		0.0738392	0.81973
																		STD_ray04_centre.czi	30.62	367.89		0.110962	1							STD_ray06_centre.czi	28.67	410.95		0.2343	0.829754	STD_ray07_centre.czi	26.11	314.72		0.206586	0.845753
																														STD_ray06_centre.czi	26.55	413.64		0.187747	0.835363	STD_ray07_centre.czi	64.9	315.19		1	0.847143
																														STD_ray06_centre.czi	25.89	414.71		0.173254	0.837594	STD_ray07_centre.czi	33.58	316.78		0.359378	0.851845
																														STD_ray06_centre.czi	29.03	415.66		0.242205	0.839575	STD_ray07_centre.czi	32.53	318.89		0.337901	0.858085
																														STD_ray06_centre.czi	29.13	416		0.244401	0.840284	STD_ray07_centre.czi	46.8	319.11		0.629781	0.858736
																														STD_ray06_centre.czi	29.99	419.39		0.263285	0.847352	STD_ray07_centre.czi	50.63	325.72		0.70812	0.878282
																														STD_ray06_centre.czi	25.83	419.84		0.171937	0.84829	STD_ray07_centre.czi	32.14	326.46		0.329924	0.880471
																														STD_ray06_centre.czi	45.39	425.91		0.601449	0.860947	STD_ray07_centre.czi	20.73	326.66		0.0965433	0.881062
																														STD_ray06_centre.czi	25.64	431.03		0.167765	0.871622	STD_ray07_centre.czi	39.48	336.3		0.480057	0.909569
																														STD_ray06_centre.czi	29.25	431.74		0.247036	0.873103	STD_ray07_centre.czi	36.49	339.85		0.4189	0.920067
																														STD_ray06_centre.czi	41.27	432.72		0.510979	0.875146	STD_ray07_centre.czi	23.22	340.48		0.147474	0.92193
																														STD_ray06_centre.czi	57.7	437.57		0.871761	0.885259	STD_ray07_centre.czi	38.32	341.9		0.456331	0.92613
																														STD_ray06_centre.czi	32.74	437.92		0.323671	0.885988	STD_ray07_centre.czi	23.45	342.81		0.152178	0.928821
																														STD_ray06_centre.czi	46.08	442.42		0.616601	0.895371	STD_ray07_centre.czi	37.98	349.03		0.449376	0.947214
																														STD_ray06_centre.czi	32.96	443.51		0.328502	0.897644	STD_ray07_centre.czi	23.21	350.33		0.147269	0.951059
																														STD_ray06_centre.czi	30.29	445.44		0.269873	0.901668	STD_ray07_centre.czi	40.79	359.46		0.506852	0.978058
																														STD_ray06_centre.czi	53.2	455.23		0.772947	0.922081	STD_ray07_centre.czi	34.6	366.88		0.380241	1
																														STD_ray06_centre.czi	48.4	458.08		0.667545	0.928023
																														STD_ray06_centre.czi	39.8	458.3		0.4787	0.928482
																														STD_ray06_centre.czi	56.84	459.24		0.852877	0.930442
																														STD_ray06_centre.czi	29.01	468.4		0.241765	0.949541
																														STD_ray06_centre.czi	21.39	469.85		0.0744401	0.952565
																														STD_ray06_centre.czi	43.76	474		0.565657	0.961218
																														STD_ray06_centre.czi	35.77	474.31		0.390206	0.961864
																														STD_ray06_centre.czi	25.48	480.87		0.164251	0.975542
																														STD_ray06_centre.czi	28.31	481.27		0.226394	0.976376
																														STD_ray06_centre.czi	19.91	491.28		0.0419412	0.997248
																														STD_ray06_centre.czi	22.53	492.6		0.099473	1

## Sheet: Fig 6J
HR_029										HR_025
fish	proximal 0 dpi	proximal 1 dpi	distal 0 dpi	distal 1 dpi	D distance proximal (µm)	D distance distal (µm)	migration proximal (%)	migration distal (%)		fish	proximal 0 dpi	proximal 1 dpi	distal 0 dpi	distal 1 dpi	D distance proximal (µm)	D distance distal (µm)	migration proximal (%)	migration distal (%)
1dpi:3_HR_1dpi_fish_GFP2 ET	52.33	6.34	27.74	3.65	45.99	24.09	-87.8846	-86.8421		control01	52.65	20.31	42.3	3.71	32.34	38.59	-61.4245	-91.2293
1dpi:3_HR_1dpi_fish_GFP2 ET0001	63.25	10.88	78.7	3.08	52.37	75.62	-82.7984	-96.0864		control02	65.74	23.44	65.95	23.49	42.3	42.46	-64.3444	-64.3821
1dpi:3_HR_1dpi_fish_GFP2 ET0002	43.32	22.31	55.92	8.28	21.01	47.64	-48.4995	-85.1931		control05	80.43	3.49	31.6	4.69	76.94	26.91	-95.6608	-85.1582
1dpi:3_HR_1dpi_fish_GFP2 ET0003	49.83	9.23	54.2	13.85	40.6	40.35	-81.477	-74.4465		control07	28.3	9.5	34.69	11.25	18.8	23.44	-66.4311	-67.5699
1dpi:3_HR_1dpi_fish_GFP2 ET0004	66.23	1.54	18.46	3.08	64.69	15.38	-97.6748	-83.3153		control08	60.01	17.26	31.25	2.88	42.75	28.37	-71.2381	-90.784
1dpi:3_HR_1dpi_fish_GFP2 ET0005	58.54	7.69	64.62	20.93	50.85	43.69	-86.8637	-67.6106		control09	63.7	23.75	70.75	9.7	39.95	61.05	-62.7159	-86.2898
1dpi:3_HR_1dpi_fish_GFP2 ET0006	58.03	6.34	43.85	25.52	51.69	18.33	-89.0746	-41.8016		control11	95.08	13.75	70.17	20.66	81.33	49.51	-85.5385	-70.5572
1dpi:3_HR_1dpi_fish_GFP2 ET0007	51.67	10.77	48.74	23.32	40.9	25.42	-79.1562	-52.1543		control12	65.25	21.59	72.3	13.22	43.66	59.08	-66.9119	-81.7151
1dpi:3_HR_1dpi_fish_GFP2 ET0008	47.79	4.62	32.34	2.18	43.17	30.16	-90.3327	-93.2591		control13	73.22	6.25	59.7	4.69	66.97	55.01	-91.4641	-92.1441
1dpi:3_HR_1dpi_fish_GFP2 ET0009	65.07	10.77	30.81	7.84	54.3	22.97	-83.4486	-74.5537		control14	61.02	9.37	73.96	9.37	51.65	64.59	-84.6444	-87.331
1dpi:3_HR_1dpi_fish_GFP2 ET0010	32.34	3.08	34.71	3.44	29.26	31.27	-90.4762	-90.0893		control15	57.32	9.37	68.3	15.62	47.95	52.68	-83.6532	-77.1303
1dpi:3_HR_1dpi_fish_GFP2 ET0011	38.46	3.08	18.53	6.15	35.38	12.38	-91.9917	-66.8106		control19	24.41	3.12	74.58	25	21.29	49.58	-87.2184	-66.4789
1dpi:3_HR_1dpi_fish_GFP2 ET0012	54.74	1.54	66.31	12.4	53.2	53.91	-97.1867	-81.3		control24	46.9	3.12	25.05	3.49	43.78	21.56	-93.3475	-86.0679
1dpi:3_HR_1dpi_fish_GFP2 ET0013	69.5	4.62	43.76	23.28	64.88	20.48	-93.3525	-46.8007		control25	28.17	6.25	60.07	9.19	21.92	50.88	-77.8133	-84.7012
1dpi:3_HR_1dpi_fish_GFP2 ET0014	65.31	35.52	80.01	20.06	29.79	59.95	-45.6132	-74.9281		control26	57.5	20.31	53.49	18.75	37.19	34.74	-64.6783	-64.9467
1dpi:3_HR_1dpi_fish_GFP2 ET0015	71.83	3.08	50.75	20	68.75	30.75	-95.7121	-60.5911		control27	65.7	9.5	67.19	10.94	56.2	56.25	-85.5403	-83.7178
1dpi:3_HR_1dpi_fish_GFP2 ET0016	49.23	3.44	68.54	7.69	45.79	60.85	-93.0124	-88.7803		control37	74.44	22.5	28.81	10.94	51.94	17.87	-69.7743	-62.0271
1dpi:3_HR_1dpi_fish_GFP2 ET0017	64.2	38.46	51.59	22.24	25.74	29.35	-40.0935	-56.8909		control41	79.7	10.75	54.78	17.19	68.95	37.59	-86.5119	-68.6199
1dpi:3_HR_1dpi_fish_GFP2 ET0018	53.93	4.62	34.4	12.4	49.31	22	-91.4333	-63.9535		control42	50.39	19.33	70.33	16.07	31.06	54.26	-61.6392	-77.1506
1dpi:3_HR_1dpi_fish_GFP2 ET0019	61.94	1.54	66.08	7.69	60.4	58.39	-97.5137	-88.3626
1dpi:3_HR_1dpi_fish_GFP2 ET0020	57.93	17.2	12.31	4.62	40.73	7.69	-70.309	-62.4695		HR_022
1dpi:3_HR_1dpi_fish_GFP2 ET0021	79.67	49.25	60.77	25.47	30.42	35.3	-38.1825	-58.0879		fish	proximal 0 dpi	proximal 1 dpi	distal 0 dpi	distal 1 dpi	D distance proximal (µm)	D distance distal (µm)	migration proximal (%)	migration distal (%)
1dpi:3_HR_1dpi_fish_GFP2 ET0022	77.75	32.34	55.73	23.32	45.41	32.41	-58.4051	-58.1554		control01	70.34	3.49	67.26	3.52	66.85	63.74	-95.0384	-94.7666
1dpi:3_HR_1dpi_fish_GFP2 ET0023	50.98	4.62	24.18	9.36	46.36	14.82	-90.9376	-61.2903		control02	75.62	19.33	57.81	1.56	56.29	56.25	-74.438	-97.3015
1dpi:3_HR_1dpi_fish_GFP2 ET0024	47.79	28.46	44.72	11.42	19.33	33.3	-40.4478	-74.4633		control05	63.33	3.12	66.8	21.93	60.21	44.87	-95.0734	-67.1707
1dpi:3_HR_1dpi_fish_GFP2 ET0025	56.92	7.69	55.23	21.59	49.23	33.64	-86.4898	-60.9089		control07	70.62	17.26	69.35	10.9	53.36	58.45	-75.5593	-84.2826
1dpi:3_HR_1dpi_fish_GFP2 ET0026	93.9	3.08	81.9	7.69	90.82	74.21	-96.7199	-90.6105		control08	66.27	6.56	50.1	3.49	59.71	46.61	-90.1011	-93.0339
1dpi:3_HR_1dpi_fish_GFP2 ET0027	61.31	4.62	61.54	4.62	56.69	56.92	-92.4645	-92.4927		control09	61.93	23.44	32.21	7.81	38.49	24.4	-62.1508	-75.7529
1dpi:3_HR_1dpi_fish_GFP2 ET0028	54.04	27.69	81.55	6.15	26.35	75.4	-48.7602	-92.4586		control11	57.19	20.37	35.25	14.06	36.82	21.19	-64.3819	-60.1135
1dpi:3_HR_1dpi_fish_GFP2 ET0029	63.25	3.08	45.38	26.96	60.17	18.42	-95.1304	-40.5906		control12	53.15	4.69	77.52	26.9	48.46	50.62	-91.1759	-65.2993
1dpi:3_HR_1dpi_fish_GFP2 ET0030	44.62	7.69	47.79	6.15	36.93	41.64	-82.7656	-87.1312		control13	68.12	4.94	65.38	16.83	63.18	48.55	-92.7481	-74.2582
1dpi:3_HR_1dpi_fish_GFP2 ET0031	58.64	4.62	40	15.46	54.02	24.54	-92.1214	-61.35		control14	34.38	13.4	63.22	21.93	20.98	41.29	-61.0239	-65.3116
1dpi:3_HR_1dpi_fish_GFP2 ET0032	63.38	3.44	66.44	12.4	59.94	54.04	-94.5724	-81.3365		control15	37.53	4.69	64.06	10.02	32.84	54.04	-87.5033	-84.3584
1dpi:3_HR_1dpi_fish_GFP2 ET0033	35.42	8.28	85.17	6.88	27.14	78.29	-76.6234	-91.922		control19	63.73	21.87	68.61	9.83	41.86	58.78	-65.6834	-85.6726
1dpi:3_HR_1dpi_fish_GFP2 ET0034	74.69	7.69	48.31	7.69	67	40.62	-89.7041	-84.082		control24	53.55	17.26	56.47	10.94	36.29	45.53	-67.7684	-80.6269
1dpi:3_HR_1dpi_fish_GFP2 ET0035	73.35	1.54	38.06	6.15	71.81	31.91	-97.9005	-83.8413		control25	75	22.3	51.94	4.69	52.7	47.25	-70.2667	-90.9704
1dpi:3_HR_1dpi_fish_GFP2 ET0036	63.25	28.58	71.58	40	34.67	31.58	-54.8142	-44.1185		control26	43.86	14.15	72.45	18.81	29.71	53.64	-67.7383	-74.0373
1dpi:3_HR_1dpi_fish_GFP2 ET0037	28.07	13.93	58.46	7.69	14.14	50.77	-50.3741	-86.8457		control27	70.66	27.29	41.57	15.62	43.37	25.95	-61.3784	-62.4248
1dpi:3_HR_1dpi_fish_GFP2 ET0038	67.85	6.15	33.85	16.92	61.7	16.93	-90.9359	-50.0148		control37	37.79	1.56	50.02	10.94	36.23	39.08	-95.8719	-78.1287
1dpi:3_HR_1dpi_fish_GFP2 ET0039	64.69	9.23	38.46	18.46	55.46	20	-85.732	-52.0021		control41	78.34	12.22	30.7	7.5	66.12	23.2	-84.4013	-75.57
1dpi:3_HR_1dpi_fish_GFP2 ET0040	40.12	6.34	54.39	3.08	33.78	51.31	-84.1974	-94.3372		control42	55.97	17.19	71.78	21.25	38.78	50.53	-69.2871	-70.3957
1dpi:3_HR_1dpi_fish_GFP2 ET0041	55.89	3.44	105.17	8.28	52.45	96.89	-93.8451	-92.127
1dpi:3_HR_1dpi_fish_GFP2 ET0042	62.82	3.08	103.81	6.34	59.74	97.47	-95.0971	-93.8927
fish	proximal 0 dpi	proximal 1 dpi	distal 0 dpi	distal 1 dpi	D distance proximal (µm)	D distance distal (µm)	migration proximal (%)	migration distal (%)		fish	proximal 0 dpi	proximal 1 dpi	distal 0 dpi	distal 1 dpi	D distance proximal (µm)	D distance distal (µm)	migration proximal (%)	migration distal (%)
1dpi:3_HR_1dpi_fish_GFP2 ET	77.4	16.2	59.03	2.31	61.2	56.72	-79.0698	-96.0867		1dpi:4_HR_1dpi_GFP2 ET	99.44	27.95	90.54	3.11	71.49	87.43	-71.8926	-96.5651
1dpi:3_HR_1dpi_fish_GFP2 ET0001	37.21	12.4	70.79	1.54	24.81	69.25	-66.6756	-97.8246		1dpi:4_HR_1dpi_GFP2 ET1	121.75	21.74	134.44	4.39	100.01	130.05	-82.1437	-96.7346
1dpi:3_HR_1dpi_fish_GFP2 ET0002	31.11	9.23	91.6	4.62	21.88	86.98	-70.3311	-94.9563		1dpi:4_HR_1dpi_GFP2 ET2	80.81	12.8	133.58	4.39	68.01	129.19	-84.1604	-96.7136
1dpi:3_HR_1dpi_fish_GFP2 ET0003	58.78	17.2	35.68		41.58		-70.7383			1dpi:4_HR_1dpi_GFP2 ET4	77.89	24.53	99.38	4.39	53.36	94.99	-68.5069	-95.5826
1dpi:3_HR_1dpi_fish_GFP2 ET0004	64.69	7.69	17.54	6.34	57	11.2	-88.1125	-63.854		1dpi:4_HR_1dpi_GFP2 ET5	155.78	40.37	108.7	36.67	115.41	72.03	-74.0852	-66.2649
1dpi:3_HR_1dpi_fish_GFP2 ET0005	26.87	7.84	60.49	21.59	19.03	38.9	-70.8225	-64.3082		1dpi:4_HR_1dpi_GFP2 ET8	133.58	12.42	102.48	6.94	121.16	95.54	-90.7022	-93.2279
1dpi:3_HR_1dpi_fish_GFP2 ET0006	55.58	23.87	26.56	10.88	31.71	15.68	-57.0529	-59.0361		1dpi:4_HR_1dpi_GFP2 ET11	131.36	36.96	142.86	45.51	94.4	97.35	-71.8636	-68.1436
1dpi:3_HR_1dpi_fish_GFP2 ET0007	92.77	16.99			75.78		-81.6859			1dpi:4_HR_1dpi_GFP2 ET12	106.47	22.8	180.23	21.74	83.67	158.49	-78.5855	-87.9376
1dpi:3_HR_1dpi_fish_GFP2 ET0008	70.16	6.15	70.79	23.08	64.01	47.71	-91.2343	-67.3965		1dpi:4_HR_1dpi_GFP2 ET17	96.27	14.16	96.72	4.39	82.11	92.33	-85.2914	-95.4611
1dpi:3_HR_1dpi_fish_GFP2 ET0009	80.01	14.18			65.83		-82.2772			1dpi:4_HR_1dpi_GFP2 ET18	37.4	6.21	105.64	25.61	31.19	80.03	-83.3957	-75.7573
1dpi:3_HR_1dpi_fish_GFP2 ET0010	92.42	23.08	69.66		69.34		-75.0271			1dpi:4_HR_1dpi_GFP2 ET19	102.67	25.61	55.99	3.11	77.06	52.88	-75.056	-94.4454
1dpi:3_HR_1dpi_fish_GFP2 ET0011	66.23	4.62	60		61.61		-93.0243			1dpi:4_HR_1dpi_GFP2 ET28	180.79	28.12	81.28	9.32	152.67	71.96	-84.446	-88.5335
1dpi:3_HR_1dpi_fish_GFP2 ET0012	73.85	0	72.32	34.2	73.85	38.12	-100	-52.7102		1dpi:4_HR_1dpi_GFP2 ET29	161.76	12.8	96.72	22.39	148.96	74.33	-92.087	-76.8507
1dpi:3_HR_1dpi_fish_GFP2 ET0013	50.98	11.2	66.31	18.01	39.78	48.3	-78.0306	-72.8397		1dpi:4_HR_1dpi_GFP2 ET33	83.62	6.21	93.63	13.11	77.41	80.52	-92.5735	-85.9981
1dpi:3_HR_1dpi_fish_GFP2 ET0014	34.16	4.62			29.54		-86.4754			1dpi:4_HR_1dpi_GFP2 ET34	87.18	25.04	131.36	3.11	62.14	128.25	-71.2778	-97.6325
1dpi:3_HR_1dpi_fish_GFP2 ET0015	46.18	3.08			43.1		-93.3304			1dpi:4_HR_1dpi_GFP2 ET35	121.12	34.79	93.37	26.94	86.33	66.43	-71.2764	-71.147
1dpi:3_HR_1dpi_fish_GFP2 ET0016	53.12	9.23	78.7		43.89		-82.6242			1dpi:4_HR_1dpi_GFP2 ET39	133.58	45.29	152.3	55.51	88.29	96.79	-66.0952	-63.5522
1dpi:3_HR_1dpi_fish_GFP2 ET0017	42.55	9.73	37.21	3.44	32.82	33.77	-77.1328	-90.7552		fish	proximal 0 dpi	proximal 1 dpi	distal 0 dpi	distal 1 dpi	D distance proximal (µm)	D distance distal (µm)	migration proximal (%)	migration distal (%)
1dpi:3_HR_1dpi_fish_GFP2 ET0018	54.39	1.54	38.58		52.85		-97.1686			1dpi:4_HR_1dpi_GFP2 ET	69.74	15.44	67.04	4.66	54.3	62.38	-77.8606	-93.0489
1dpi:3_HR_1dpi_fish_GFP2 ET0019	79.42	12.4	28.74		67.02		-84.3868			1dpi:4_HR_1dpi_GFP2 ET1	65.22	12.42	62.11	6.94	52.8	55.17	-80.9568	-88.8263
1dpi:3_HR_1dpi_fish_GFP2 ET0020	61.71	28.07	10.77	6.15	33.64	4.62	-54.513	-42.8969		1dpi:4_HR_1dpi_GFP2 ET2	90.54	9.32	73.34	26.53	81.22	46.81	-89.7062	-63.826
1dpi:3_HR_1dpi_fish_GFP2 ET0021	49.45	9.36	47.69	6.15	40.09	41.54	-81.0718	-87.1042		1dpi:4_HR_1dpi_GFP2 ET4	68.41	16.72	68.32	6.21	51.69	62.11	-75.5591	-90.9104
1dpi:3_HR_1dpi_fish_GFP2 ET0022	64.91	12.4	48.49	26.2	52.51	22.29	-80.8966	-45.9682		1dpi:4_HR_1dpi_GFP2 ET5	62.19	12.42	99.43	21.96	49.77	77.47	-80.0289	-77.9141
1dpi:3_HR_1dpi_fish_GFP2 ET0023	43.08	15.38			27.7		-64.299			1dpi:4_HR_1dpi_GFP2 ET8	77.64	15.84	106	9.32	61.8	96.68	-79.5981	-91.2075
1dpi:3_HR_1dpi_fish_GFP2 ET0024	64.62	1.54	50.86	4.87	63.08	45.99	-97.6168	-90.4247		1dpi:4_HR_1dpi_GFP2 ET11	128.69	9.32	142.89	33.45	119.37	109.44	-92.7578	-76.5904
1dpi:3_HR_1dpi_fish_GFP2 ET0025	63.38	23.08	40.03	6.15	40.3	33.88	-63.5847	-84.6365		1dpi:4_HR_1dpi_GFP2 ET12	96.27	9.82	105.64	15.84	86.45	89.8	-89.7995	-85.0057
1dpi:3_HR_1dpi_fish_GFP2 ET0026	61.56	3.44	55.58		58.12		-94.412			1dpi:4_HR_1dpi_GFP2 ET17	112.19	18.63	72.5	23.92	93.56	48.58	-83.3942	-67.0069
1dpi:3_HR_1dpi_fish_GFP2 ET0027	58.46	1.54	75.4		56.92		-97.3657			1dpi:4_HR_1dpi_GFP2 ET18	99.43	23.26	198.1	6.21	76.17	191.89	-76.6067	-96.8652
1dpi:3_HR_1dpi_fish_GFP2 ET0028	35.52	1.54	46.26	21.54	33.98	24.72	-95.6644	-53.4371		1dpi:4_HR_1dpi_GFP2 ET19	84.37	11.2	74.6	6.94	73.17	67.66	-86.7251	-90.6971
1dpi:3_HR_1dpi_fish_GFP2 ET0029	35.92	4.62	57.44	3.44	31.3	54	-87.1381	-94.0111		1dpi:4_HR_1dpi_GFP2 ET28	103.23	9.82	90.06	6.21	93.41	83.85	-90.4873	-93.1046
1dpi:3_HR_1dpi_fish_GFP2 ET0030	35.68	1.54	46.79	7.69	34.14	39.1	-95.6839	-83.5649		1dpi:4_HR_1dpi_GFP2 ET29	67.04	9.82	65.22	9.82	57.22	55.4	-85.352	-84.9433
1dpi:3_HR_1dpi_fish_GFP2 ET0031	43.21	20.06	58.46	4.62	23.15	53.84	-53.5756	-92.0972		1dpi:4_HR_1dpi_GFP2 ET33	26.72	6.21	146.26	9.32	20.51	136.94	-76.759	-93.6278
1dpi:3_HR_1dpi_fish_GFP2 ET0032	72.37	4.62	67.85	1.54	67.75	66.31	-93.6161	-97.7303		1dpi:4_HR_1dpi_GFP2 ET34	69.79	15.84	115.28	3.11	53.95	112.17	-77.3033	-97.3022
1dpi:3_HR_1dpi_fish_GFP2 ET0033	38.06	1.54			36.52		-95.9538			1dpi:4_HR_1dpi_GFP2 ET35	132.23	12.42	142.89	9.82	119.81	133.07	-90.6073	-93.1276
1dpi:3_HR_1dpi_fish_GFP2 ET0034	66.15	15.38	36.96	6.34	50.77	30.62	-76.7498	-82.8463		1dpi:4_HR_1dpi_GFP2 ET39	118.05	18.89	90.91	18.63	99.16	72.28	-83.9983	-79.5072
1dpi:3_HR_1dpi_fish_GFP2 ET0035	18.72	4.87	55.38	12.31	13.85	43.07	-73.985	-77.7718
1dpi:3_HR_1dpi_fish_GFP2 ET0036	70.79	32.34	66.17		38.45		-54.3156
1dpi:3_HR_1dpi_fish_GFP2 ET0037	47.39	3.08	20.06		44.31		-93.5007
1dpi:3_HR_1dpi_fish_GFP2 ET0038	44.72	16.99	61.62	16.99	27.73	44.63	-62.0081	-72.4278
1dpi:3_HR_1dpi_fish_GFP2 ET0039	43.08	6.15	83.09	16.92	36.93	66.17	-85.7242	-79.6365
1dpi:3_HR_1dpi_fish_GFP2 ET0040	64.27	4.62	69.25	18.46	59.65	50.79	-92.8116	-73.343
1dpi:3_HR_1dpi_fish_GFP2 ET0041	66.17	15.46	44.16	23.08	50.71	21.08	-76.6359	-47.7355
1dpi:3_HR_1dpi_fish_GFP2 ET0042	51.35	1.54	41.99		49.81		-97.001
HR_026
fish	proximal 0 dpi	proximal 1 dpi	distal 0 dpi	distal 1 dpi	D distance proximal (µm)	D distance distal (µm)	migration proximal (%)	migration distal (%)
HR_1dpi_all-1.tif:c:2/2 - Image003	156.05	49.41	84.77	32.63	106.64	52.14	-68.3371	-61.5076
HR_1dpi_all-1.tif:c:2/2 - Image004	118.66	15.39	62.19	18.48	103.27	43.71	-87.0302	-70.2846
HR_1dpi_all-1.tif:c:2/2 - Image005	139.79	10.26	108.74	11.46	129.53	97.28	-92.6604	-89.4611
HR_1dpi_all-1.tif:c:2/2 - Image006	180.37	53.55	83.91	7.25	126.82	76.66	-70.311	-91.3598
HR_1dpi_all-1.tif:c:2/2 - Image009	136.79	15.39	83.91	5.12	121.4	78.79	-88.7492	-93.8982
HR_1dpi_all-1.tif:c:2/2 - Image010	131.02	10.26	80.98	7.25	120.76	73.73	-92.1691	-91.0472
HR_1dpi_all-1.tif:c:2/2 - Image011	93.17	15.39	86.96	19.63	77.78	67.33	-83.4818	-77.4264
HR_1dpi_all-1.tif:c:2/2 - Image012	158.39	11.46	127.67	7.25	146.93	120.42	-92.7647	-94.3213
HR_1dpi_all-1.tif:c:2/2 - Image018	80.98	30.75	95.01	32.26	50.23	62.75	-62.0277	-66.0457
HR_1dpi_all-1.tif:c:2/2 - Image019	118.05	5.12	84.6	31.31	112.93	53.29	-95.6629	-62.9905
HR_1dpi_all-1.tif:c:2/2 - Image021	77.7	26.13	142.86	5.12	51.57	137.74	-66.3707	-96.4161
HR_1dpi_all-1.tif:c:2/2 - Image024	78.2	10.25	158.35	7.25	67.95	151.1	-86.8926	-95.4215
HR_1dpi_all-1.tif:c:2/2 - Image025	86.96	0	159.87	11.46	86.96	148.41	-100	-92.8317
HR_1dpi_all-1.tif:c:2/2 - Image026	136.65	5.12	141.43	36.6	131.53	104.83	-96.2532	-74.1215
HR_1dpi_all-1.tif:c:2/2 - Image034	83.91	11.46	87.01	5.12	72.45	81.89	-86.3425	-94.1156
HR_1dpi_all-1.tif:c:2/2 - Image035	56.24	5.12	105.64	5.12	51.12	100.52	-90.8962	-95.1534
fish	proximal 0 dpi	proximal 1 dpi	distal 0 dpi	distal 1 dpi	D distance proximal (µm)	D distance distal (µm)	migration proximal (%)	migration distal (%)
HR_1dpi_all-1.tif:c:2/2 - Image003	127.67	11.65	177.26	11.65	116.02	165.61	-90.8749	-93.4277
HR_1dpi_all-1.tif:c:2/2 - Image004	40.37	10.25	93.17	21.74	30.12	71.43	-74.6099	-76.6663
HR_1dpi_all-1.tif:c:2/2 - Image005	177.45	10.25	90.06	16.2	167.2	73.86	-94.2237	-82.012
HR_1dpi_all-1.tif:c:2/2 - Image006	93.16	21.74	152.3	7.25	71.42	145.05	-76.6638	-95.2397
HR_1dpi_all-1.tif:c:2/2 - Image009	102.44	0	149.07	18.48	102.44	130.59	-100	-87.6031
HR_1dpi_all-1.tif:c:2/2 - Image010	101.73	7.25	62.11	5.12	94.48	56.99	-92.8733	-91.7566
HR_1dpi_all-1.tif:c:2/2 - Image011	87.18	5.12	164.71	16.2	82.06	148.51	-94.1271	-90.1645
HR_1dpi_all-1.tif:c:2/2 - Image012	104.16	23.94	139.79	11.46	80.22	128.33	-77.0161	-91.802
HR_1dpi_all-1.tif:c:2/2 - Image018	99.38	7.25	108.87	41.31	92.13	67.56	-92.7048	-62.0557
HR_1dpi_all-1.tif:c:2/2 - Image019	102.91	22.92	111.84	27.59	79.99	84.25	-77.7281	-75.3308
HR_1dpi_all-1.tif:c:2/2 - Image021	84.08	15.37	99.57	11.46	68.71	88.11	-81.7198	-88.4905
HR_1dpi_all-1.tif:c:2/2 - Image024	59.01	16.2	87.01	5.12	42.81	81.89	-72.547	-94.1156
HR_1dpi_all-1.tif:c:2/2 - Image025	143.7	10.25	93.17	7.25	133.45	85.92	-92.8671	-92.2185
HR_1dpi_all-1.tif:c:2/2 - Image026	108.74	16.2	113.34	7.25	92.54	106.09	-85.1021	-93.6033
HR_1dpi_all-1.tif:c:2/2 - Image034	65.51	5.12	68.39	21.13	60.39	47.26	-92.1844	-69.1037
HR_1dpi_all-1.tif:c:2/2 - Image035	121.16	10.25	99.43	16.2	110.91	83.23	-91.5401	-83.7071

## Sheet: Fig 6K,L
DISTAL FIRST REMOVED							1 dpi								2 dpi
fish 0 dpi	fish 1 dpi	fish 2 dpi	proximal 0 dpi	proximal 1 dpi	distal 0 dpi	distal 1 dpi	D distance proximal (µm)	D distance distal (µm)	migration proximal (%)	migration distal (%)	migration proximal (%)	migration distal (%)	proximal 2 dpi	distal 2 dpi	D distance proximal (µm)	D distance distal (µm)	migration proximal (%)	migration distal (%)	migration proximal (%)	migration distal (%)			1 dpi							2 dpi
_0002	_	_	51.49	57.36	7.94	5.88	-5.87	2.06	11.4003	-25.9446	-11.4003	25.9446	0	0	51.49	7.94	-100	-100	100	100			Distal 1st							Distal 1st
_0003	_0001	_0001	19.12	52.96	33.82	19.34	-33.84	14.48	176.987	-42.8149	-176.987	42.8149	3.12	0	16	33.82	-83.682	-100	83.682	100			proximal		distal		p-value prox vs dist			proximal		distal		p-value prox vs dist
_0010	_0002	_0015	32.39	82.35	11.76	4.65	-49.96	7.11	154.245	-60.4592	-154.245	60.4592	4.94	0	27.45	11.76	-84.7484	-100	84.7484	100			mean	sem	mean	sem				mean	sem	mean	sem
_0011	_0003		26.47	66.19	58.82	50.34	-39.72	8.48	150.057	-14.4169	-150.057	14.4169										distance 0 dpi	32.23	2.45902	39.345	4.60099			distance 0 dpi	73.1858	14.1454	2.4475	0.594312
_0015	_0004	_0004	28.29	33.95	46.14	45.68	-5.66	0.46	20.0071	-0.996966	-20.0071	0.996966	4.69	3.49	23.6	42.65	-83.4217	-92.4361	83.4217	92.4361		D distance	-22.2128	4.07855	25.0489	4.7635			D distance	30.5	2.97695	36.9431	4.92785
_0016	_0005	_0005	44.22	47.08	57.37	30.92	-2.86	26.45	6.46766	-46.1042	-6.46766	46.1042	2.21	0	42.01	57.37	-95.0023	-100	95.0023	100
_0018	_0006	_0013	36.76	76.47	42.67	1.47	-39.71	41.2	108.025	-96.555	-108.025	96.555	0	0	36.76	42.67	-100	-100	100	100		Migration	73.1858	14.1454	-60.796	6.65398			Migration	-90.98	2.2705	-97.0287	0.946907
_0019	_0007	_0014	38.82	72.3	33.86	11.76	-33.48	22.1	86.2442	-65.2688	-86.2442	65.2688	2.21	3.12	36.61	30.74	-94.3071	-90.7856	94.3071	90.7856
_	_0008	_0002	14.71	17.71	50	19.34	-3	30.66	20.3943	-61.32	-20.3943	61.32	2.21	2.21	12.5	47.79	-84.9762	-95.58	84.9762	95.58
_0001	_0009	_0003	26.47	28.06	19.12	11.76	-1.59	7.36	6.0068	-38.4937	-6.0068	38.4937	4.69	0	21.78	19.12	-82.2818	-100	82.2818	100
_0006	_0010		26.51	39.73	39.73	14.78	-13.22	24.95	49.868	-62.7989	-49.868	62.7989
_0007	_0011	_0006	39.81	42.49	40.14	13.24	-2.68	26.9	6.73198	-67.0154	-6.73198	67.0154	6.44	2.21	33.37	37.93	-83.8232	-94.4943	83.8232	94.4943
_0013	_0012	_0009	50	80.94	83.94	7.35	-30.94	76.59	61.88	-91.2437	-61.88	91.2437	0	3.12	50	80.82	-100	-96.2831	100	96.2831
_0014	_0013	_0010	41.28	86.76	54.41	4.41	-45.48	50	110.174	-91.8949	-110.174	91.8949	0	0	41.28	54.41	-100	-100	100	100
_0021	_0014	_0011	29.99	61.83	31.02	4.41	-31.84	26.61	106.169	-85.7834	-106.169	85.7834	0	2.21	29.99	28.81	-100	-92.8756	100	92.8756
_0004	_0015	_0012	29.99	56.06	57.65	1.47	-26.07	56.18	86.929	-97.4501	-86.929	97.4501	2.21	0	27.78	57.65	-92.6309	-100	92.6309	100
_0005	_0016	_0007	22.06	23.32	22.11	4.65	-1.26	17.46	5.7117	-78.9688	-5.7117	78.9688	6.44	2.21	15.62	19.9	-70.8069	-90.0045	70.8069	90.0045
_0017	_0017	_0008	21.76	54.41	17.71	5.88	-32.65	11.83	150.046	-66.7984	-150.046	66.7984	0	0	21.76	17.71	-100	-100	100	100
PROXIMAL FIRST REMOVED							1 dpi								2 dpi
fish 0 dpi	fish 1 dpi	fish 2 dpi	proximal 0 dpi	proximal 1 dpi	distal 0 dpi	distal 1 dpi	D distance proximal (µm)	D distance distal (µm)	migration proximal (%)	migration distal (%)	migration proximal (%)	migration distal (%)	proximal 2 dpi	distal 2 dpi	D distance proximal (µm)	D distance distal (µm)	migration proximal (%)	migration distal (%)	migration proximal (%)	migration distal (%)			1 dpi							2 dpi
_0019	_0001	_0018	53.93	23.58	27.94	67.65	30.35	-39.71	-56.2767	142.126	56.2767	-142.126	4.94	2.21	48.99	25.73	-90.84	-92.0902	90.84	92.0902			Proximal 1st							Proximal 1st
_0015	_0002	_0015	55.96	41.28	32.39	94.16	14.68	-61.77	-26.233	190.707	26.233	-190.707	3.12	3.12	52.84	29.27	-94.4246	-90.3674	94.4246	90.3674			proximal		distal		p-value prox vs dist			proximal		distal		p-value prox vs dist
_0016	_0003	_0016	57.37	44.34	36.76	73.53	13.03	-36.77	-22.7122	100.027	22.7122	-100.027	0	0	57.37	36.76	-100	-100	100	100			mean	sem	mean	sem				mean	sem	mean	sem
_0011	_0004	_0019	87.08	48.62	48.55	69.18	38.46	-20.63	-44.1663	42.4923	44.1663	-42.4923	4.69	2.21	82.39	46.34	-94.6141	-95.448	94.6141	95.448		distance 0 dpi	64.3114	4.81885	39.5914	2.7913			distance 0 dpi	-41.0299	5.57369	2.42667	0.451118
_0012	_0005	_0020	80.9	48.53	37.71	77.39	32.37	-39.68	-40.0124	105.224	40.0124	-105.224	0	0	80.9	37.71	-100	-100	100	100		D distance	29.5238	5.0014	-33.3881	3.54431			D distance	64.7433	5.10244	38.3656	3.15465
_0003	_0006	_0005	53.27	51.83	37.65	98.53	1.44	-60.88	-2.70321	161.7	2.70321	-161.7	2.21	3.12	51.06	34.53	-95.8513	-91.7131	95.8513	91.7131
_0004	_0007	_0006	35.32	35.29	21.76	50.02	0.03	-28.26	-0.0849377	129.871	0.0849377	-129.871	4.94	2.21	30.38	19.55	-86.0136	-89.8438	86.0136	89.8438		Migration	-41.0299	5.57369	93.723	11.8651			Migration	-95.5819	0.946243	-94.7562	1.10485
_0007	_0008	_0013	17.65	16.24	23.56	60.29	1.41	-36.73	-7.98867	155.9	7.98867	-155.9
_0018	_0010	_0012	40.14	16.18	39.81	73.53	23.96	-33.72	-59.6911	84.7023	59.6911	-84.7023	3.12	4.94	37.02	34.87	-92.2272	-87.5911	92.2272	87.5911
_0017	_0011	_0001	93.39	50.09	61.78	88.24	43.3	-26.46	-46.3647	42.8294	46.3647	-42.8294	0	3.12	93.39	58.66	-100	-94.9498	100	94.9498
_0013	_0012	_0003	62.62	14.71	36.88	61.92	47.91	-25.04	-76.5091	67.8959	76.5091	-67.8959	3.12	3.12	59.5	33.76	-95.0176	-91.5401	95.0176	91.5401
_0014	_0013	_0004	77.94	62.39	39.17	95.6	15.55	-56.43	-19.9512	144.064	19.9512	-144.064	3.49	0	74.45	39.17	-95.5222	-100	95.5222	100
_0020	_0014	_0002	32.49	32.35	33.82	70.65	0.14	-36.83	-0.430902	108.9	0.430902	-108.9	3.12	3.12	29.37	30.7	-90.397	-90.7747	90.397	90.7747
_	_0015		57.65	21.06	50	55.04	36.59	-5.04	-63.4692	10.08	63.4692	-10.08
_0001	_0016	_0010	79.63	33.95	30.4	64.71	45.68	-34.31	-57.3653	112.862	57.3653	-112.862	0	0	79.63	30.4	-100	-100	100	100
_0008	_0017	_0008	62.04	29.41	44.51	67.79	32.63	-23.28	-52.5951	52.3029	52.5951	-52.3029	0	0	62.04	44.51	-100	-100	100	100
_0009	_0018	_0009	82.41	26.63	19.17	23.53	55.78	-4.36	-67.686	22.7439	67.686	-22.7439	4.69	2.21	77.72	16.96	-94.3089	-88.4716	94.3089	88.4716
_0002	_0019	_	64.77	28.1	48.62	64.77	36.67	-16.15	-56.6157	33.2168	56.6157	-33.2168	3.12	3.49	61.65	45.13	-95.183	-92.8219	95.183	92.8219
_0010	_0020	_0007	110.33	11.76	66.24	92.75	98.57	-26.51	-89.3411	40.0211	89.3411	-40.0211	0	0	110.33	66.24	-100	-100	100	100
_0005	_0021	_0014	79.47	54.49	60.29	89.9	24.98	-29.61	-31.4332	49.1126	31.4332	-49.1126	3.12	0	76.35	60.29	-96.074	-100	96.074	100
_0006	_0022		66.18	39.71	34.41	93.39	26.47	-58.98	-39.997	171.404	39.997	-171.404

## Sheet: Fig 6M
control	fish	proximal	distal		FK506	proximal	distal
HR_031	_				ray01	x	x
	_0001				ray02		x
	_0002				ray03	x	x
	_0003				ray04		x
	_0004		x		ray05	x	x
	_0005				ray06	x	x
	_0006		x		ray07		x
	_0007		x		ray08	x	x
	_0008		x		ray10	x	x
	_0009		x		ray11		x
	_0010				ray12		x
	_0011				ray13		x
	_0012				ray14	x	x
	_0013		x		ray15		x
	_0014		x		ray16		x
	_0015				ray17	x	x
	_0016		x
	_0017		x
	_0018
	_0019
	_0020		x
	_0021
	_0022
	_0023
	_0024
HR_029	_
	_0001
	_0002
	_0003
	_0004		x
	_0005
	_0006
	_0007
	_0008
	_0009
	_0010		x
	_0011
	_0012		x
	_0013
	_0014		x
	_0015		x
	_0016
HR_026	_0001
	_0002		x
	_0003		x
	_0005		x
	_0006		x
	_0007		x
	_0008
	_0009
	_0010		x
	_0011
	_0012
	_0013
	_0014
	_0015		x
56		0	22
100		0	39.2857

## Sheet: Fig6 suppl 1A
	1 dpi		2dpi
	yes	no	yes	no	total
numbers	19	17	34	2	36
%	52.7778	47.2222	94.4444	5.55556	100

## Sheet: Fig 6 suppl 1C
	1dpa	distance 1st joint - gfp segment -1 (µm) 0dpa	distance 1st joint - gfp segment -1 (µm) 1dpa	D distance 1st joint	% distance 1st joint change	migration (%)
FK506_fish01	fish010	57.359	14.823	42.536	-74.1575	74.1575
FK506_fish02	fish007	80.602	31.026	49.576	-61.5072	61.5072
FK506_fish03	fish004	32.704	10.714	21.99	-67.2395	67.2395
FK506_fish04	fish008	49.035	14.293	34.742	-70.8514	70.8514
FK506_fish05	fish005	58.54	16.057	42.483	-72.5709	72.5709
FK506_fish06	fish001	46.734	27.828	18.906	-40.4545	40.4545
FK506_fish07	fish002	45.34	9.598	35.742	-78.8311	78.8311
FK506_fish08	fish006	48.464	19.398	29.066	-59.9744	59.9744
FK506_fish09	fish003	35.616	19.07	16.546	-46.4566	46.4566
FK506_fish10	fish009	50.263	18.265	31.998	-63.6611	63.6611
FK506_fish01	fish010	63.97	30.152	33.818	-52.8654	52.8654
FK506_fish02	fish007	69.5	7.041	62.459	-89.8691	89.8691
FK506_fish03	fish004	70.751	20.476	50.275	-71.0591	71.0591
FK506_fish04	fish008	65.163	22.516	42.647	-65.4466	65.4466
FK506_fish05	fish005	41.368	4.388	36.98	-89.3928	89.3928
FK506_fish06	fish001	66.608	29.288	37.32	-56.0293	56.0293
FK506_fish07	fish002	64.37	4.388	59.982	-93.1832	93.1832
FK506_fish08	fish006	56.891	7.313	49.578	-87.1456	87.1456
FK506_fish09	fish003	51.357	17.612	33.745	-65.7067	65.7067
FK506_fish10	fish009	49.814	29.252	20.562	-41.2776	41.2776
control_fish01	fish006	55.076	17.041	38.035	-69.0591	69.0591
control_fish02	fish007	35.586	16.827	18.759	-52.7146	52.7146
control_fish03	fish001	29.398	12.177	17.221	-58.5788	58.5788
control_fish04	fish002	49.491	19.014	30.477	-61.5809	61.5809
control_fish05	fish009	51.086	10.071	41.015	-80.2862	80.2862
control_fish06	fish010	58.229	29.831	28.398	-48.7695	48.7695
control_fish07	fish008	44.483	4.625	39.858	-89.6028	89.6028
control_fish08	fish003	43.902	29.398	14.504	-33.0372	33.0372
control_fish09	fish004	46.894	18.503	28.391	-60.5429	60.5429
control_fish10	fish005	49.663	22.641	27.022	-54.4107	54.4107
control_fish01	fish006	56.057	19.553	36.504	-65.1194	65.1194
control_fish02	fish007	45.411	10.342	35.069	-77.2258	77.2258
control_fish03	fish001	29.398	19.07	10.328	-35.1316	35.1316
control_fish04	fish002	60.834	40.978	19.856	-32.6396	32.6396
control_fish05	fish009	57.116	36.594	20.522	-35.9304	35.9304
control_fish06	fish010	45.434	14.626	30.808	-67.8082	67.8082
control_fish07	fish008	33.924	5.85	28.074	-82.7556	82.7556
control_fish08	fish003	57.06	3.975	53.085	-93.0336	93.0336
control_fish09	fish004	50.496	16.826	33.67	-66.6785	66.6785
control_fish10	fish005	37.03	15.133	21.897	-59.1331	59.1331

[truncated: 3 more sheets: Fig 6 suppl 1D, Fig 6 suppl 1E, Fig 6 suppl 1F]
