# Supplementary material for: Zebrafish fin regeneration involves generic and regeneration-specific osteoblast injury responses
Source: eLife journal article supplement (doi:10.7554/elife.77614), 2022-06-24
Supplement: figures [file elife-77614-figures-v2.pdf]

---

## Figures and figure supplements

Zebrafish fin regeneration involves generic and regeneration-specific osteoblast injury responses

**Ivonne Sehring *et al***

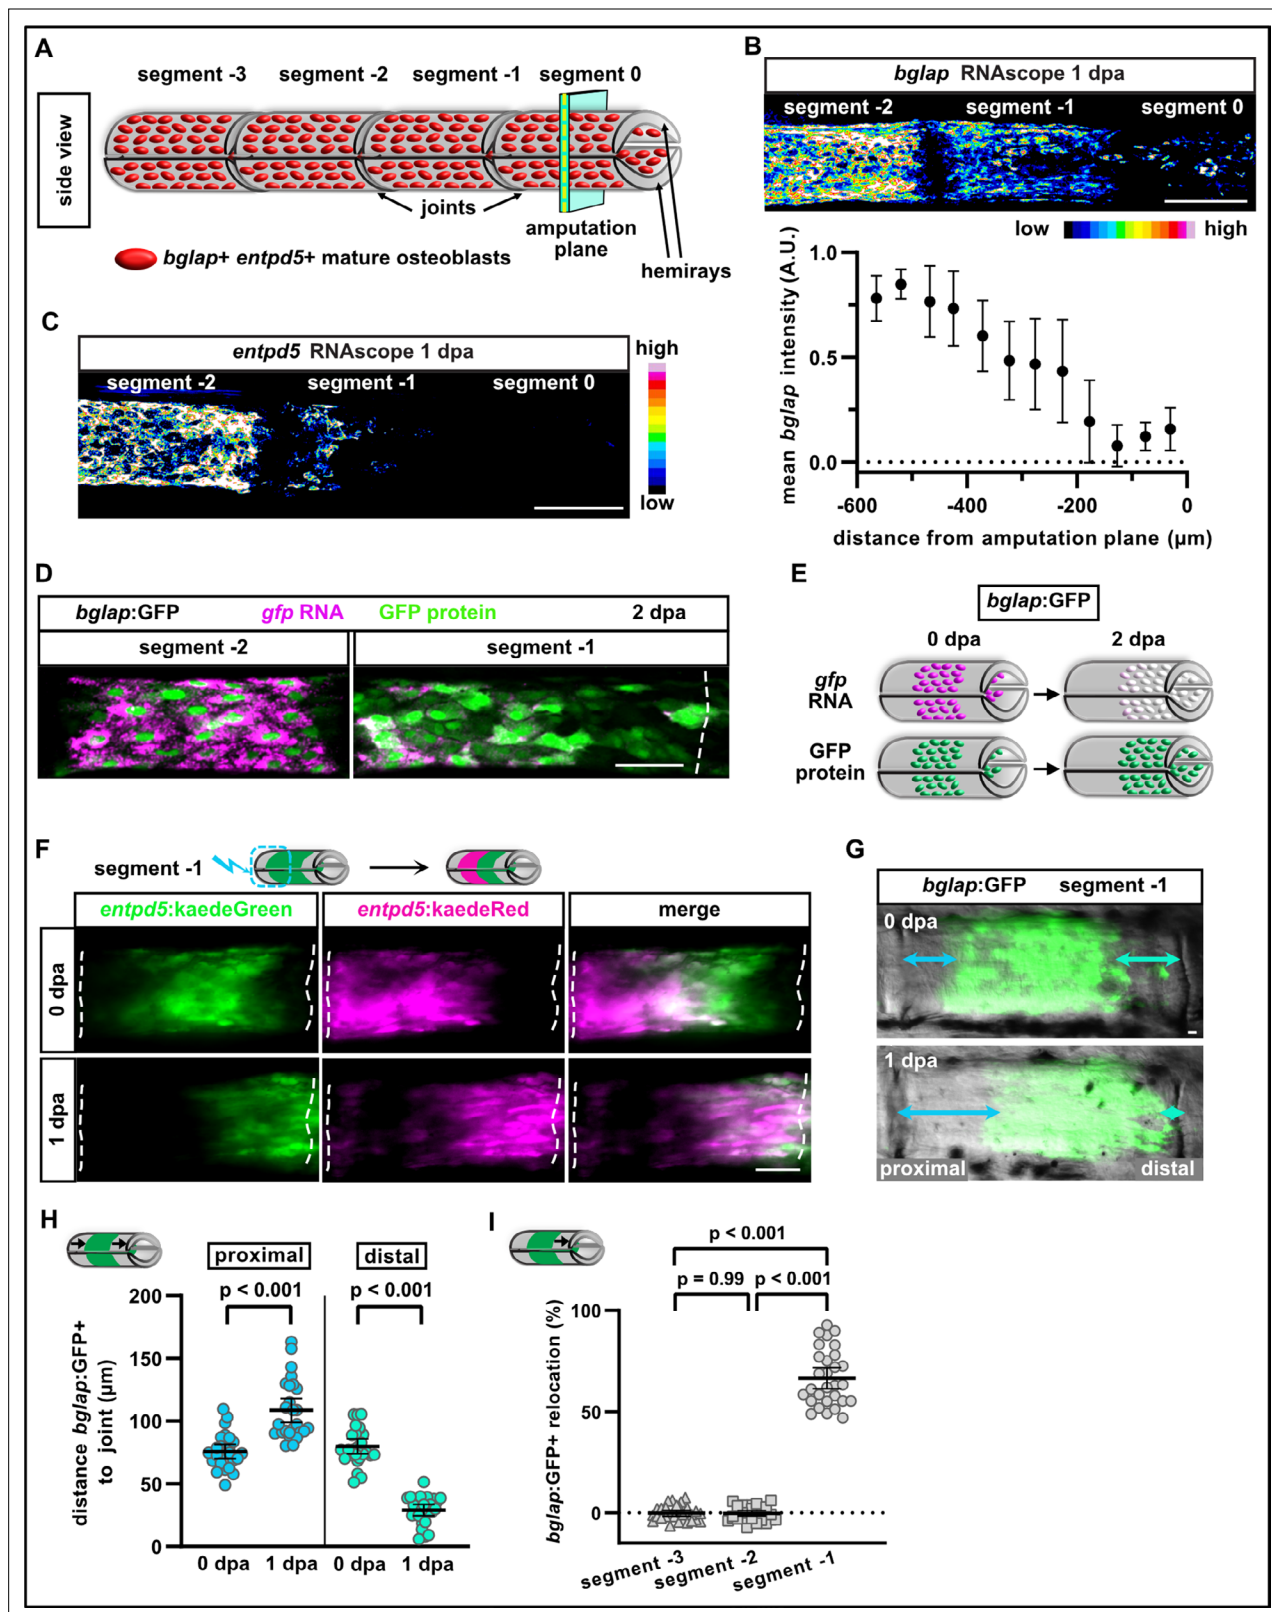

**Figure 1.** Osteoblasts dedifferentiate and migrate in response to fin amputation. **(A)** Schematic presentation of one fin ray with mature osteoblasts expressing *bglap* and *entpd5* lining the hemirays. **(B)** RNAscope in situ analysis of *bglap* expression in segments 0, -1, and -2 at 1 day post amputation (dpa). Expression of *bglap* gradually decreases towards the amputation plane. N (experiments)=1, n (fins)=5, n (rays)=15. Error bars represent SEM. Scale bar, 100 μm. **(C)** RNAscope in situ detection of *entpd5* expression in segments 0, -1, and -2 at 1 dpa. Scale bar, 100 μm. **(D)** In *bglap*:GFP fish,

Figure 1 continued on next page

## Figure 1 continued

expression of *gfp* RNA is downregulated in segment –1 at 2 dpa, while GFP protein persists. Segment –2 shows overlap of *gfp* RNA and GFP protein (note that GFP protein is enriched in the nuclei). Dashed lines indicate segment border. Distal to the right. Scale bar, 50  $\mu$ m. **(E)** Scheme illustrating the use of *bglap*:GFP transgenics for analysis of osteoblast migration via relocation of cells that are negative for *gfp* RNA, but positive for GFP protein. **(F)** At 0 dpa, *entpd5*:Kaede positive osteoblasts in the proximal half of segment –1 were photoconverted from *entpd5*:kaedeGreen to *entpd5*:kaedeRed. Repeated imaging reveals distal relocation of photoconverted osteoblasts by 1 dpa. Dashed lines indicate segment borders. Distal to the right. Scale bar, 50  $\mu$ m. **(G)** *bglap*:GFP is expressed in a subset of osteoblasts in the centre of each segment and absent around the joints. Repeated imaging reveals relocation of GFP+ cells towards the distal joint in segment –1 by 1 dpa. Distal to the right. Scale bar, 10  $\mu$ m. **(H)** Quantification of the distance between the bulk of *bglap*:GFP+ cells and joints in segment –1 at 0 and 1 dpa. At 1 dpa, the proximal distance is increased, while the distal distance is reduced. N (experiments)=3, n (fins)=26, n (rays)=26. Error bars represent 95% CI. Unpaired t-test. **(I)** Quantification of *bglap*:GFP+ bulk migration in segment –3, –2, and –1 at 1 dpa. 100% indicates full crossing of the distance to the respective joint. Osteoblasts migrate distally in segment –1. N (experiments)=2, n (fins)=19, n (rays)=29. Error bars represent 95% CI. Mann Whitney test.

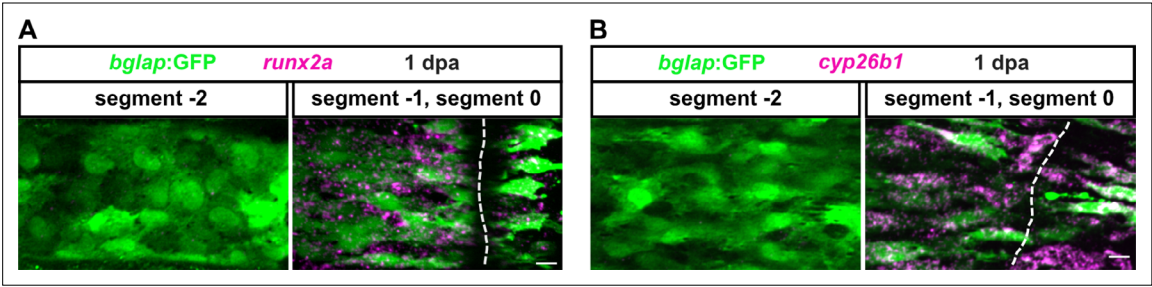

**Figure 1—figure supplement 1.** Osteoblasts upregulate dedifferentiation markers in response to fin amputation. **(A)** RNAscope in situ detection of *runx2a* expression at 1 day post amputation (dpa) in *bglap:GFP* transgenics. *runx2a* is expressed in GFP+ and GFP– cells in segment 0 and segment –1, but not further proximally in segment –2. Dashed lines indicate segment border. Distal to the right. Scale bar, 10 μm. **(B)** RNAscope in situ detection of *cyp26b1* expression at 1 dpa in *bglap:GFP* transgenics. *cyp26b1* is expressed in GFP+ and GFP– cells in segment 0 and segment –1, but not further proximally in segment –2. Dashed lines indicate segment border. Distal to the right. Scale bar, 10 μm.



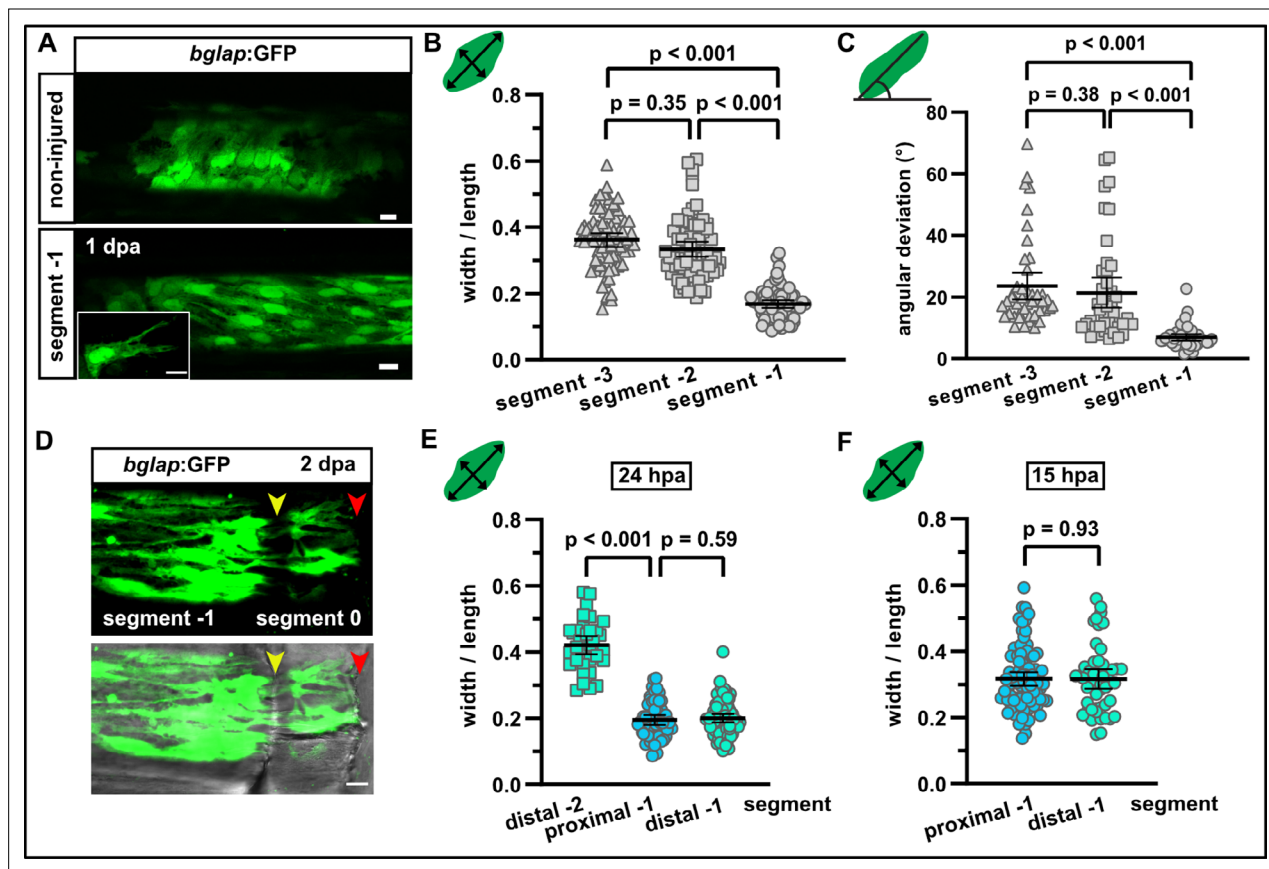

**Figure 2.** Osteoblasts elongate and orient along the proximodistal axis of the fin in response to fin amputation. **(A)** *bglap:GFP*+ osteoblast morphology in a non-injured fin (upper panel) and in segment -1 at 1 day post amputation (dpa) (lower panel). Scale bar, 10  $\mu$ m. **(B)** Quantification of *bglap:GFP*+ osteoblast roundness as width/length ratio at 1 dpa. Osteoblasts are more elongated in segment -1. N (experiments)=1, n (fins)=5, n (rays)=5, n (cells)=72. Error bars represent 95% CI. Kruskal-Wallis test. **(C)** Quantification of *bglap:GFP*+ osteoblast orientation as angular deviation from the proximodistal axis at 1 dpa. In segment -1, osteoblasts display increased alignment along the axis. N (experiments)=1, n (fins)=5, n (rays)=5, n (cells)=44. Error bars represent 95% CI. Kruskal-Wallis test. **(D)** At 2 dpa, *bglap:GFP*+ osteoblasts can be observed within the distal joint of segment -1, and GFP+ protrusions can be seen spanning the joint, indicating that osteoblasts migrate through the joint. Yellow arrowheads, joints; red arrowheads, amputation plane. Scale bar, 10  $\mu$ m. **(E)** Osteoblast roundness in distal and proximal parts of segments (40% of total segment length from the respective end) at 24 hpa. No difference within segment -1 can be detected. N (experiments)=1, n (fins)=5, n (rays)=5, n (cells)=34 (segment -2), 55 (proximal segment -1), 78 (distal segment -1). Error bars represent 95% CI. Mann-Whitney test. **(F)** Osteoblast roundness in distal and proximal parts of segment -1 at 15 hpa. No difference within segment -1 can be detected. N (experiments)=1, n (fins)=6, n (rays)=15, n (cells)=82 (proximal), 49 (distal). Error bars represent 95% CI. Mann-Whitney test. The observed relative difference is 0.3%, the calculated smallest significant difference 13%, which is smaller than what we observe between segment -2 and segment -1 (**B**, 54%).

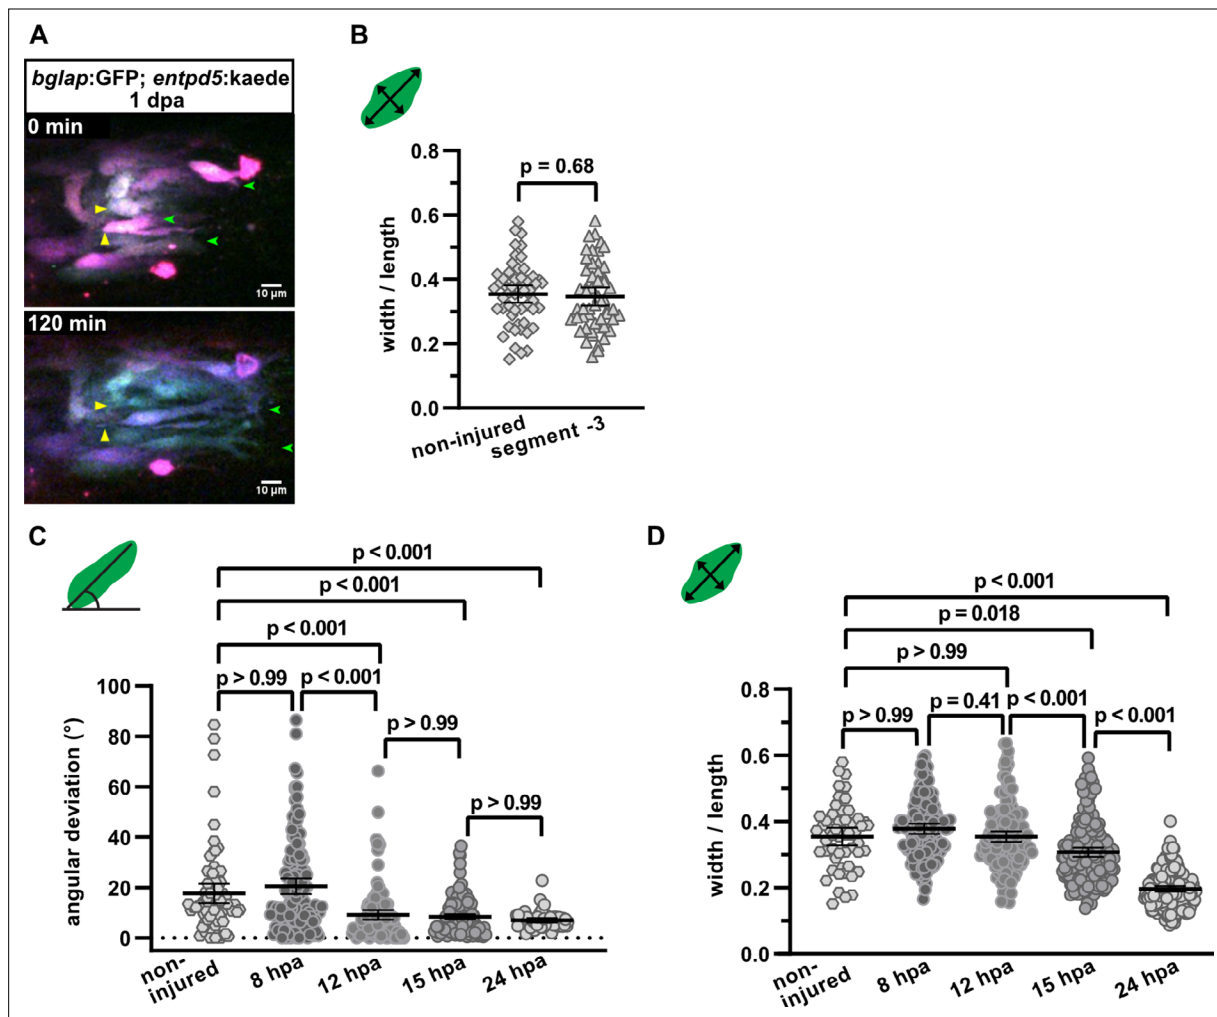

**Figure 2—figure supplement 1.** Osteoblasts elongate and orient along the proximodistal axis of the fin in response to fin amputation. **(A)** Still images from Video 1. *bglap:GFP; entpd5:kaede* osteoblasts at 1 day post amputation (dpa). KaedeGreen was partially converted to kaedeRed, resulting in different colouring for each cell. Yellow arrowheads point at moving cell bodies, green arrowhead at forming protrusions. Distal to the right. Scale bar, 10  $\mu$ m. **(B)** Osteoblast roundness in a segment of the non-injured fin and in segment -3 at 1 dpa. *bglap:GFP+* osteoblasts in segment -3 have a similar morphology as osteoblasts in the non-injured fin. N (experiments)=1, n (fins)=5, n (rays)=5, n (cells)=54. Error bars represent 95% CI. Unpaired t-test. The observed relative difference is 2%, the calculated smallest significant difference is 13% and thus smaller than what we observe between segment -2 and segment -1 (Figure 2B, 54%). **(C)** Osteoblast orientation in non-injured fins and in segment -1 at various time points post fin amputation. Alignment along the proximodistal axis can first be detected at 12 hpa. N (experiments)=1, n (rays)=5 (non-injured), 10 (8 hpa), 8 (12 hpa), 12 (15 hpa), 11 (24 hpa); n (cells)=74 (non-injured), 134 (8 hpa), 124 (12 hpa), 162 (15 hpa), 53 (24 hpa). Error bars represent 95% CI. Kruskal-Wallis test. **(D)** Osteoblast roundness in non-injured fins and in segment -1 at various time points. Elongation can first be detected at 15 hpa. N (experiments)=1, n (rays)=5 (non-injured), 10 (8 hpa), 8 (12 hpa), 12 (15 hpa), 11 (24 hpa); n (cells)=54 (non-injured), 134 (8 hpa), 151 (12 hpa), 176 (15 hpa), 176 (24 hpa). Error bars represent 95% CI. Kruskal-Wallis test.

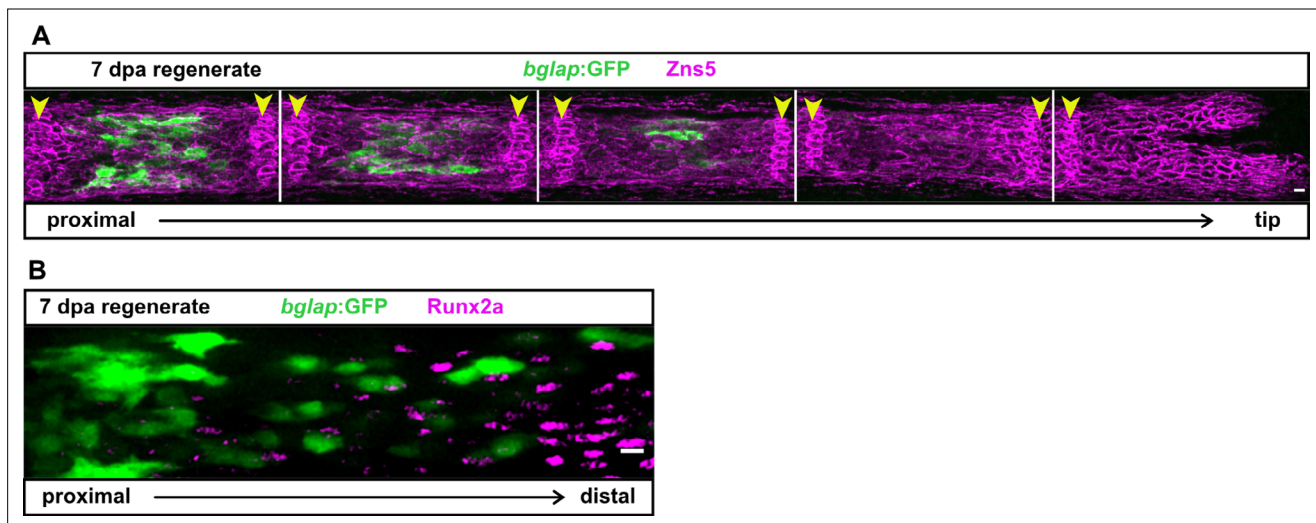

**Figure 2—figure supplement 2.** The *bglap:GFP* transgenic reporter is specific for a subset of differentiated osteoblasts. **(A)** In the fin regenerate, the number of osteoblasts expressing the *bglap:GFP* transgene progressively increases in further proximally located (older) segments, and *bglap:GFP*+ osteoblasts are only located at the centre of each segment. The five distal segments of one fin ray are shown at 7 day post amputation (dpa), with osteoblasts and joint cells labelled by immunofluorescence with the pan-osteoblastic marker *Zns5*. In the two distal-most segments, osteoblasts are not yet mature enough to express *bglap:GFP*. Arrowheads indicate the joints. Scale bar, 10  $\mu$ m. **(B)** In the 7 dpa regenerate, *Runx2* as detected by immunofluorescence is expressed distally in pre-osteoblasts, while *bglap:GFP* is expressed proximally. No overlap between *Runx2* and *GFP* expression can be detected. Scale bar, 10  $\mu$ m.

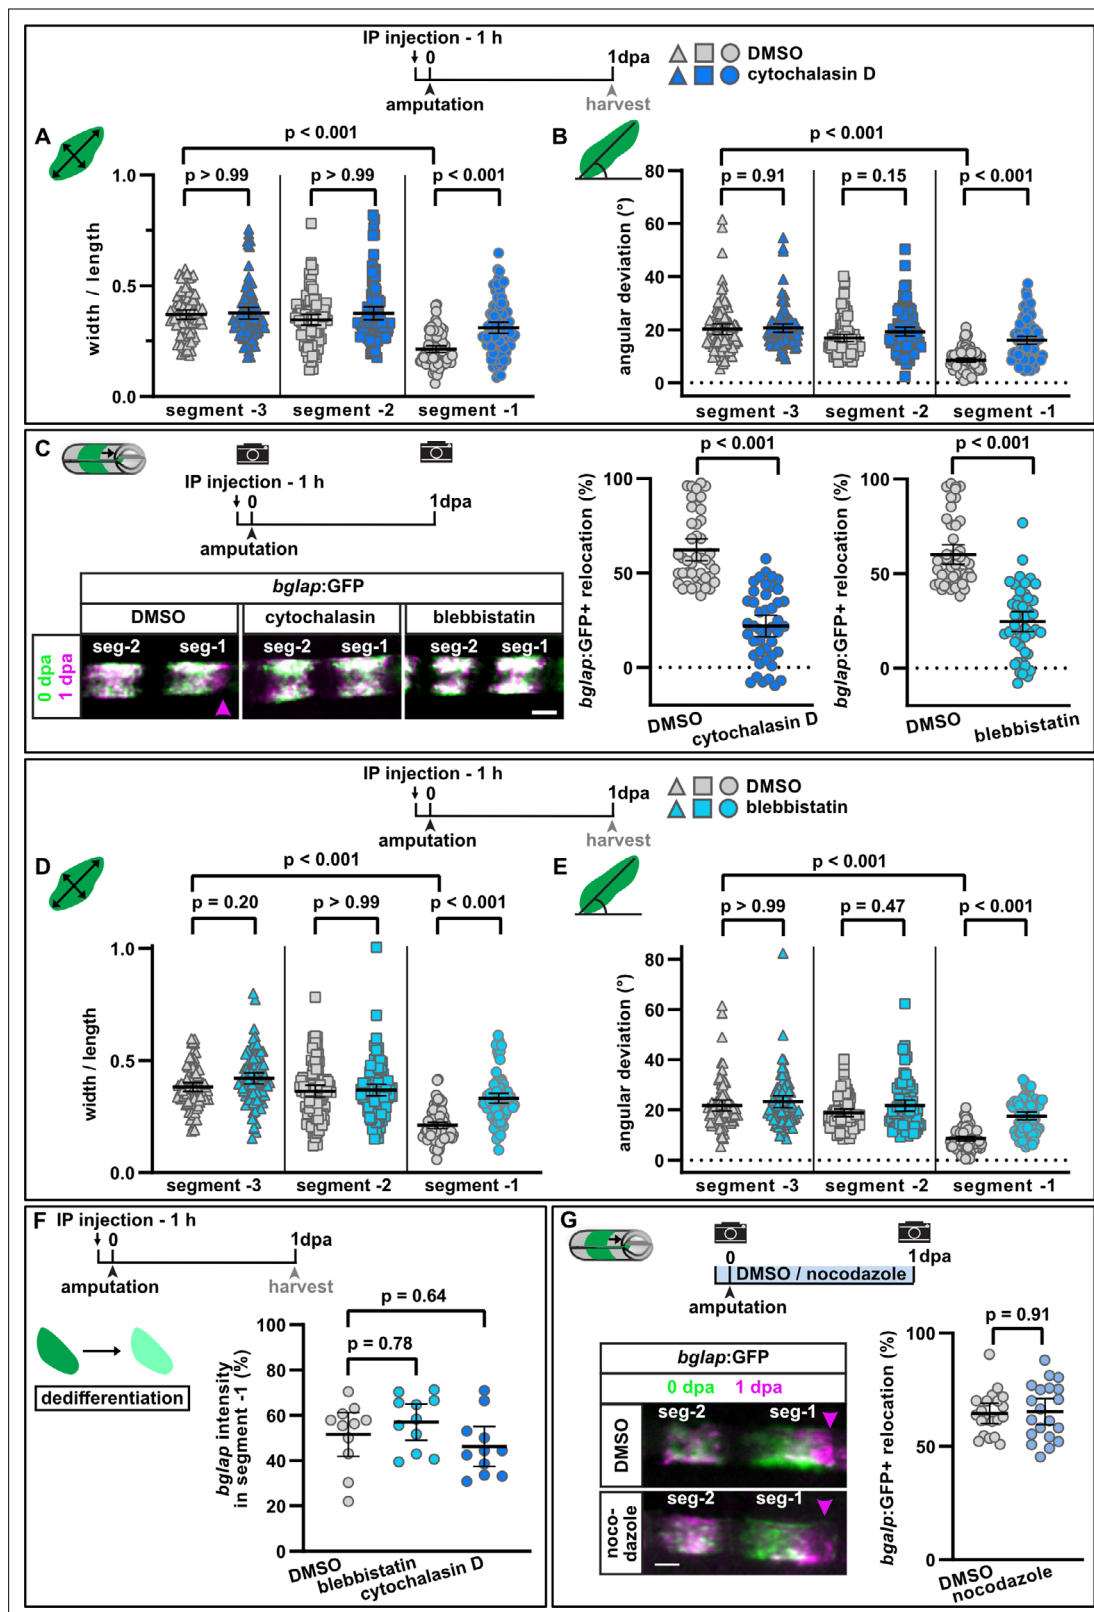

**Figure 3.** Interference with actomyosin, but not microtubule dynamics inhibits osteoblast cell shape changes and migration. **(A)** Osteoblast roundness at 1 day post amputation (dpa). Inhibition of actin dynamics with cytochalasin D does not alter osteoblast cell shape in segments -3 and -2, but cell elongation in segment -1 is inhibited. N (experiments)=3, n (fins)=15, n (rays)=15, n (cells)=87. Error bars represent 95% CI. Kruskal-Wallis test. **(B)** Osteoblast orientation at 1 dpa. Cytochalasin D does not alter osteoblast orientation in segments -3 and -2, but alignment along the proximodistal

Figure 3 continued on next page

## Figure 3 continued

axis in segment –1 is impaired. N (experiments)=3, n (fins)=15, n (rays)=15, n (cells)=93. Error bars represent 95% CI. Kruskal-Wallis test. (C) Both cytochalasin D and blebbistatin treatment impair bulk osteoblast migration. Images show overlay of 0 dpa (green) and 1 dpa (pink) pictures, with the pink arrowhead indicating relocation of osteoblasts in controls, where no signal overlap is observed at the distal side. Graph: 100% indicates full crossing of the distance to the respective joint at 1 dpa. Cytochalasin D: N(experiments)=3, n (fins)=22, n (rays)=44; blebbistatin: n (fins)=24, n (rays)=48, appertaining controls have the same n. Error bars represent 95% CI. Mann-Whitney test. Scale bar, 100  $\mu$ m. (D) Osteoblast roundness at 1 dpa. Inhibition of myosin activity with blebbistatin does not alter osteoblast cell shape in segments –3 and –2, but cell elongation in segment –1 is inhibited. N (experiments)=3, n (fins)=15, n (rays)=15, n (cells)=89. Error bars represent 95% CI. Kruskal-Wallis test. (E) Osteoblast orientation at 1 dpa. Blebbistatin does not alter osteoblast orientation in segments –3 and –2, but alignment along the proximodistal axis in segment –1 is impaired. N (experiments)=3, n (fins)=15, n (rays)=15, n (cells)=77. Error bars represent 95% CI. Kruskal-Wallis test. (F) Neither cytochalasin nor blebbistatin treatment affects osteoblast dedifferentiation. Plotted are the 1 dpa *bglap* RNAscope signal intensity levels in segment –1 relative to those in the same ray in segment –2. N (experiments)=1, n (fins)=6, n (rays)=12. Error bars represent 95% CI. Kruskal-Wallis test. The observed relative difference is 3% (blebbistatin) and 2% (cytochalasin), the calculated smallest significant difference for both assays is 9%, which is smaller than what we observe after retinoic acid treatment (Figure 4B, 63%). (G) Inhibition of microtubule dynamics with nocodazole does not affect osteoblast migration. Images show overlay of 0 dpa (green) and 1 dpa (pink) pictures. N (experiments)=1, n (fins)=10, n (rays)=20. Error bars represent 95% CI. Unpaired t-test. The observed relative difference is 1%, the calculated smallest significant difference is 24% and thus smaller than what we observe in actomyosin treatment regimens (C, 60–63%). Scale bar, 100  $\mu$ m.

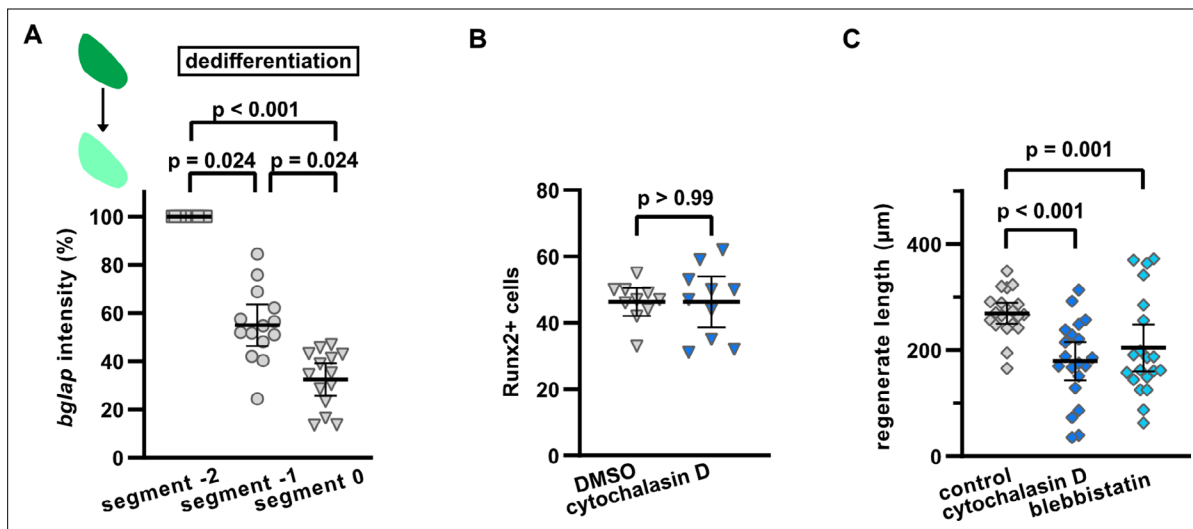

**Figure 3—figure supplement 1.** Interference with actomyosin dynamics does not affect upregulation of the preosteoblast marker Runx2 in dedifferentiating osteoblasts, but reduces growth of the regenerate. **(A)** *bglap* RNAscope at 1 day post amputation (dpa) in segment -2, segment -1, and segment 0 of the same fin ray. Expression in segment -2 was set to 100%. N (experiments)=1, n (fins)=7, n (rays)=14. Error bars represent 95% CI. Dunn's test. **(B)** Cytochalasin D does not affect the number of cells upregulating Runx2 as determined by immunofluorescence in segment 0 at 2 dpa. N (experiments)=1, n (fins)=6, n (rays)=10. Error bars represent 95% CI. Unpaired t-test. **(C)** Absolute regenerate length at 3 dpa is reduced by both cytochalasin D and blebbistatin treatment. N (experiments)=2, n (fins)=20 (DMSO, cytochalasin), 19 (blebbistatin). Error bars represent 95% CI. Unpaired t-test.

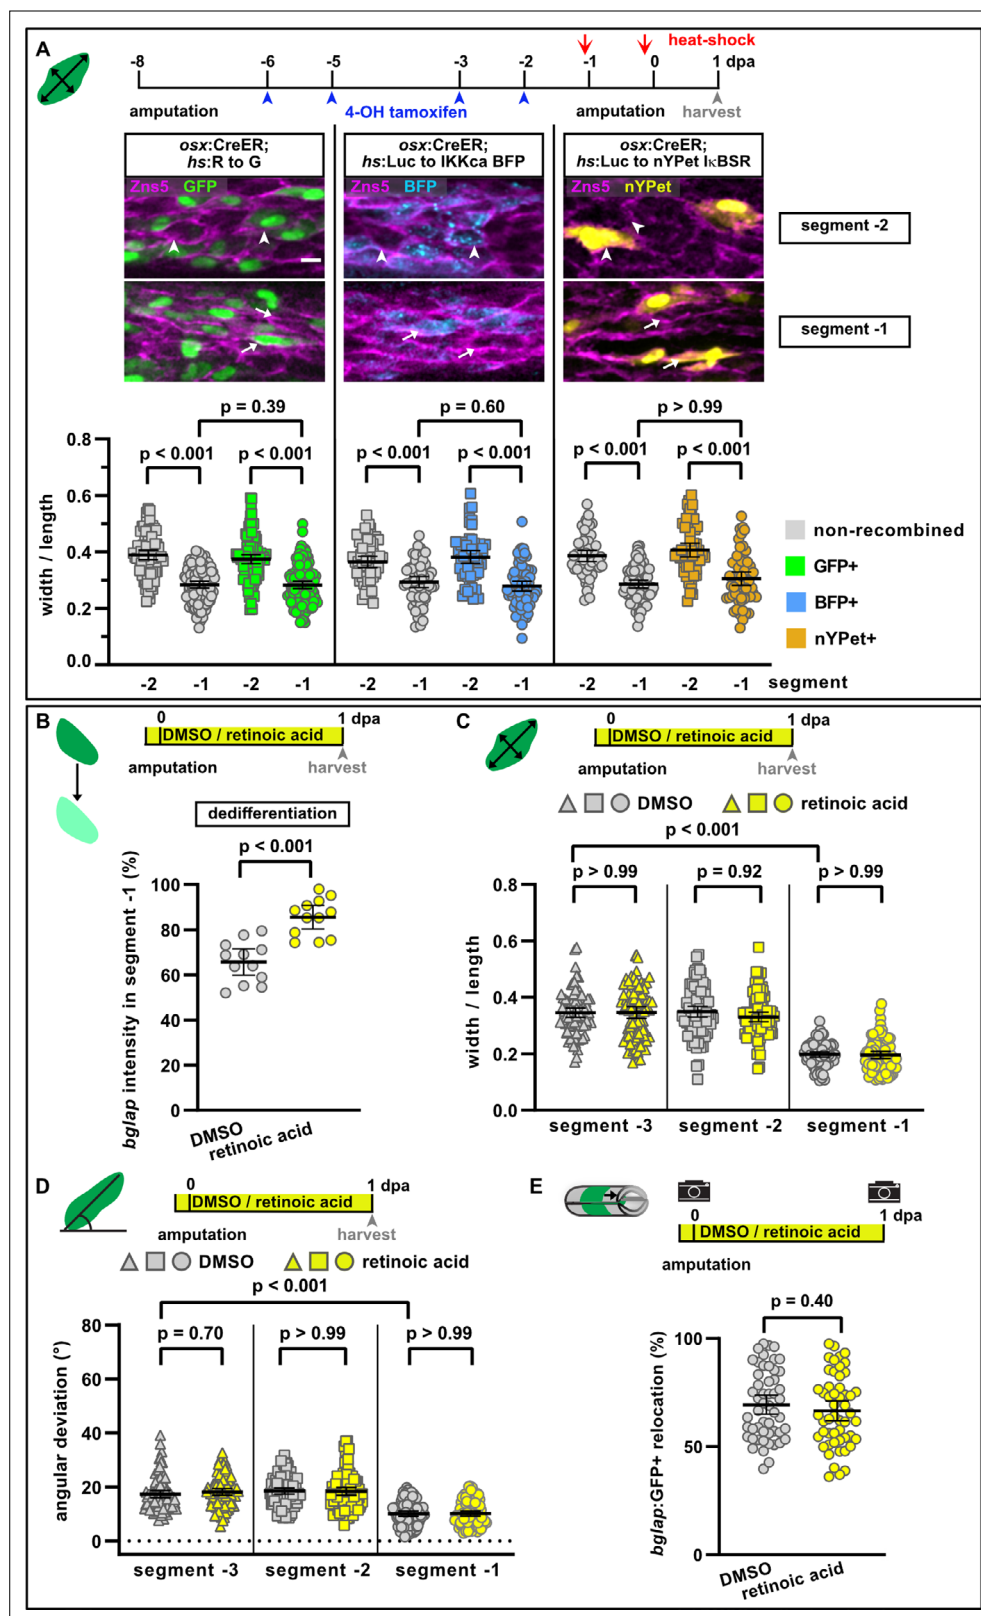

**Figure 4.** NF- $\kappa$ B and retinoic acid signalling regulate osteoblast dedifferentiation but not migration. **(A)** Mosaic recombination in *osx:CreER; hs:R to G*, *osx:CreER; hs:Luc to IKKα BFP* and *osx:CreER; hs:Luc to nYPet IκBSR* fish. Zns5 labels the membrane of osteoblasts. White arrowheads highlight roundish osteoblasts, white arrows highlight elongated osteoblasts. Osteoblast roundness in recombined and non-recombined osteoblasts in segment -2

Figure 4 continued on next page



## Figure 4 continued

and segment -1 at 1 day post amputation (dpa) is plotted. Recombined osteoblasts expressing IKKca (marked by BFP) or  $\text{I}\kappa\text{BSR}$  (marked by nYPet) elongate in segment -1 to a similar extent as osteoblasts expressing the negative control GFP. N (experiments)=1, R to G: n (fins)=3, n (rays)=10, n (cells)=406; IKKca: n (fins)=4, n (rays)=7, n (cells)=244;  $\text{I}\kappa\text{BSR}$ : n (fins)=8, n (rays)=18, n (cells)=246. Error bars represent 95% CI. Kruskal-Wallis test. Scale bar, 10  $\mu\text{m}$ . **(B)** Treatment with retinoic acid (RA) inhibits osteoblast dedifferentiation measured as *bglap* RNAscope intensity at 1 dpa in segment -1 relative to the intensity in segment -2 in the same rays. N (experiments)=1, n (fins)=6, n (rays)=12. Error bars represent 95% CI. Unpaired t-test. **(C)** Osteoblast roundness at 1 dpa. RA treatment does neither alter osteoblast cell shape in segments -3 and -2, nor elongation in segment -1. N (experiments)=2, n (fins)=10, n (rays)=10, n (cells)=83. Error bars represent 95% CI. Kruskal-Wallis test. The observed relative difference in segment -1 is 2%, the calculated smallest significant difference is 7%, which is smaller than what we observe in cytochalasin treatment regimens (**Figure 3A**, 22%). **(D)** Osteoblast orientation at 1 dpa. RA treatment does not affect osteoblast orientation in segments -3 and -2, nor alignment along the proximodistal axis in segment -1. N (experiments)=2, n (fins)=10, n (rays)=10, n (cells)=89. Error bars represent 95% CI. Kruskal-Wallis test. The observed relative difference in segment -1 is 1%, the calculated smallest significant difference is 7%, which is smaller than what we observe in cytochalasin treatment regimens (**Figure 3B**, 32%). **(E)** RA treatment does not affect bulk migration of osteoblasts towards the amputation plane in segment -1. N (experiments)=3, n (fins)=26, n (rays)=52. Error bars represent 95% CI. Unpaired t-test. The observed relative difference is 2%, the calculated smallest significant difference is 22%, which is smaller than what we observe in actomyosin treatment regimens (**Figure 3C** 60–63%).



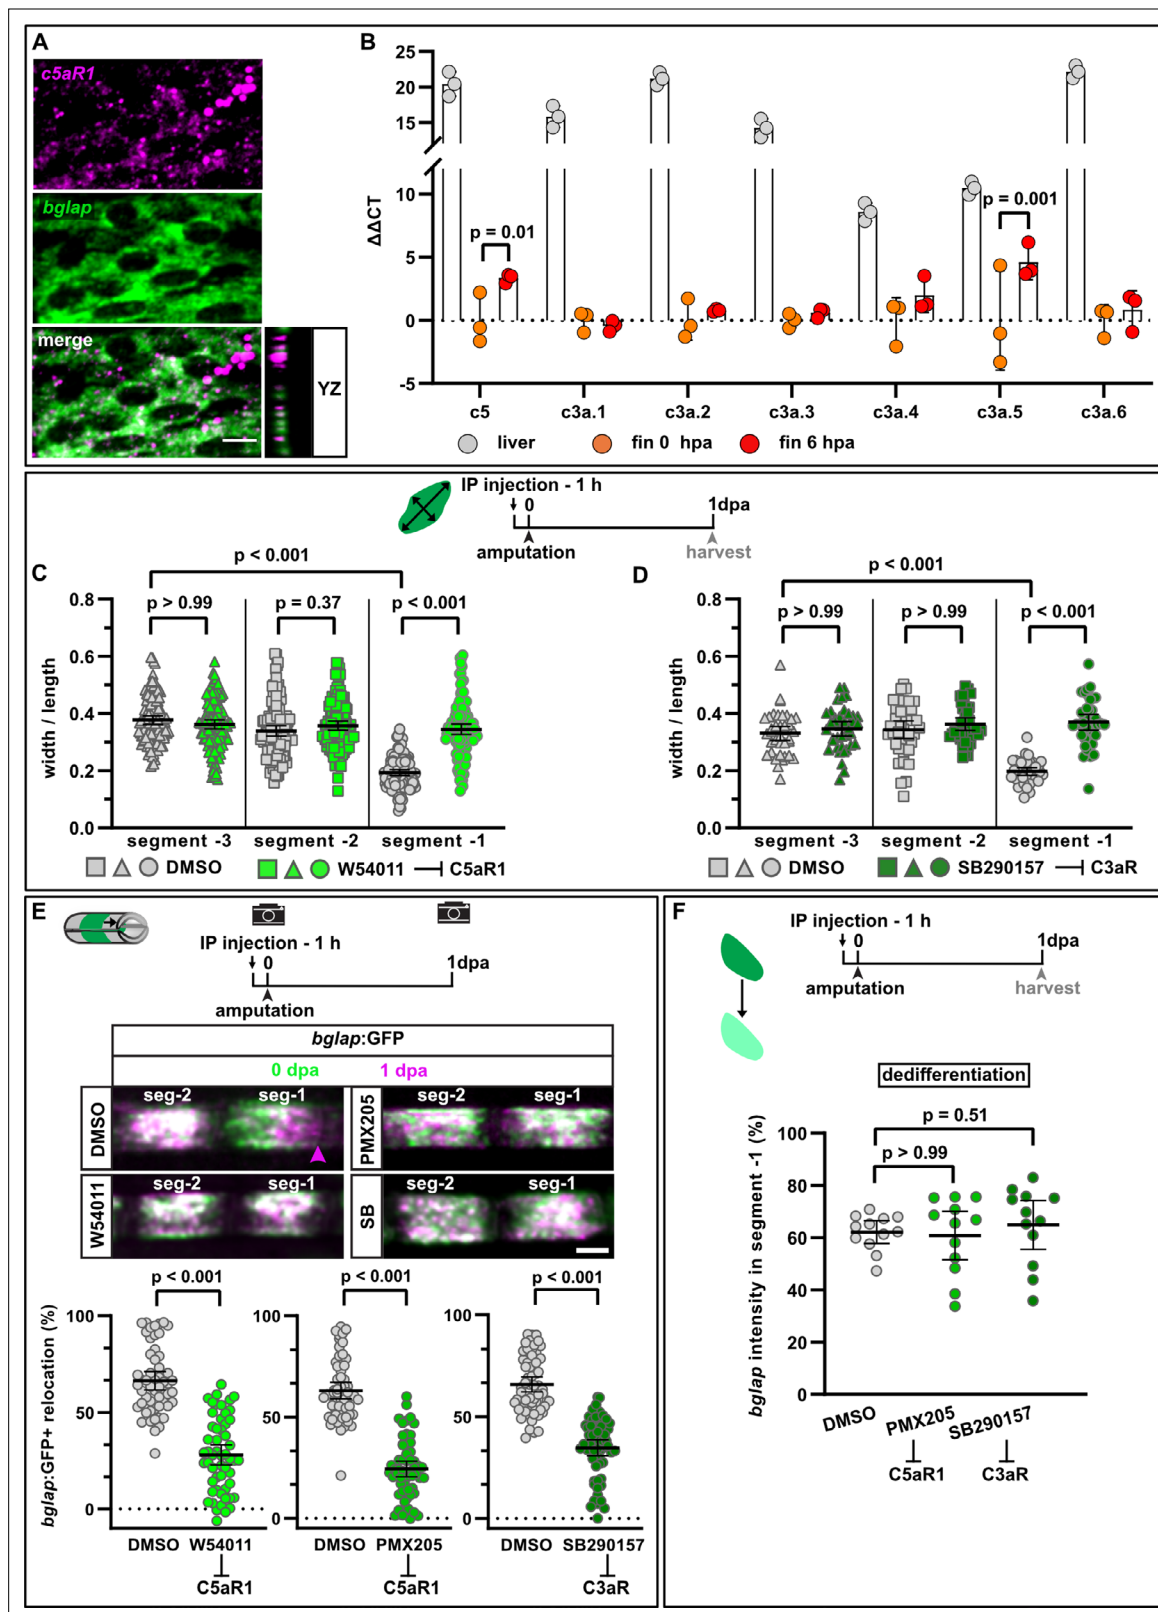

**Figure 5.** Complement system signalling regulates osteoblast cell shape changes and migration in vivo. **(A)** RNAscope in situ detection of *c5aR1* expression in *bglap* expressing osteoblasts in a non-injured fin segment. YZ section shows localisation of both RNAs in the same cell layer. Scale bar, 10  $\mu$ m. **(B)** Expression of complement factors detected by qRT-PCR in the liver, fins at 0 hpa and 6 hpa. Plotted are the  $\Delta\Delta$ CT values relative to the 0 hpa fins. Each data point represents one biological replicate. Error bars represent SD. Two-way ANOVA. **(C)** Osteoblast roundness at 1 day post amputation

Figure 5 continued on next page

## Figure 5 continued

(dpa). The C5aR1 inhibitor W54011 does not alter osteoblast cell shape in segments –3 and –2, but cell elongation in segment –1 is inhibited. N (experiments)=3, n (fins)=5, n (rays)=5, n (cells)=116. Error bars represent 95% CI. Kruskal-Wallis test. **(D)** Osteoblast roundness at 1 dpa. The C3R inhibitor SB290157 does not alter osteoblast cell shape in segments –3 and –2, but cell elongation in segment –1 is inhibited. N (experiments)=1, n (fins)=5, n (rays)=5, n (cells)=38. Error bars represent 95% CI. Kruskal-Wallis test. **(E)** Inhibition of C5aR1 with either W54011 or PMX205, and inhibition of C3aR with SB290157 impairs bulk osteoblast migration. Images show overlay of 0 dpa (green) and 1 dpa (pink) pictures. N (experiments)=3, W54011: n (fins)=27, n (rays)=54; PMX-205, SB290157: n (fins)=29, n (rays)=58. Error bars represent 95% CI. Mann-Whitney tests. Scale bar, 100  $\mu$ m. **(F)** Neither inhibition of C5aR1 (W54011, PMX205) nor of C3aR (SB290157) affects osteoblast dedifferentiation measured as *bglap* RNAscope intensity at 1 dpa in segment –1 relative to the intensity in segment –2 of the same rays. N (experiments)=1; n (fins)=5 (DMSO), 4 (PMX205), 6 (SB290157); n (rays)=12. Error bars represent 95% CI. Kruskal-Wallis test. The observed relative difference is 1% for PMX205 and SB290157, the calculated smallest significant differences are 6% (PMX205) and 5% (SB290157), which are smaller than what we observe after retinoic acid treatment (**Figure 4B**; 7%).

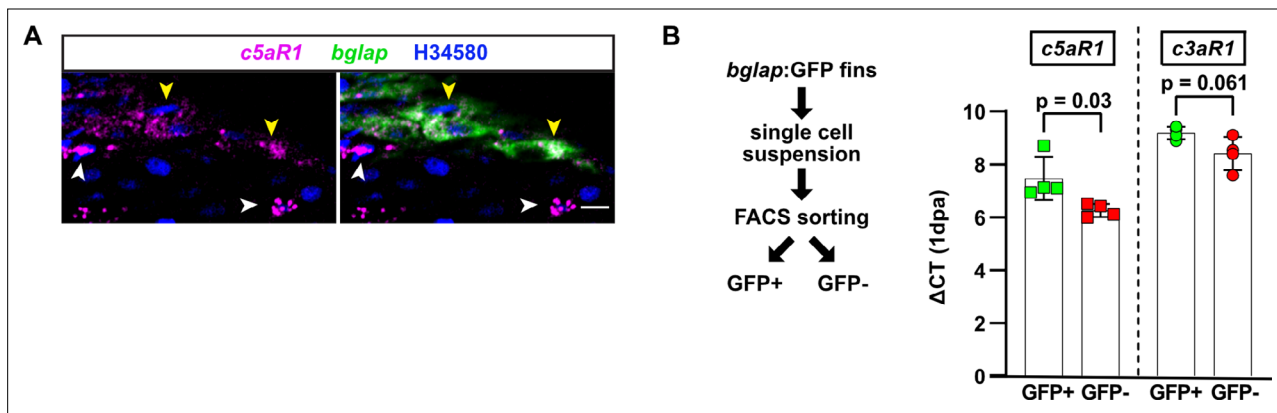

**Figure 5—figure supplement 1.** Localisation of complement receptors in the zebrafish fin. **(A)** RNAscope in situ detection of *c5aR1* and *bglap* expression in a non-injured fin ray segment. Yellow arrowheads, osteoblasts detected by *bglap* expression; white arrowheads, other cell types. Nuclei are stained by H34580. Scale bar, 10  $\mu$ m. **(B)** Cells isolated from segment -1 and segment 0 of *bglap*:GFP fins at 1 day post amputation (dpa) were FACS-sorted for GFP and subjected to qRT-PCR. Both *c5aR1* and *c3aR1* are expressed in *bglap*:GFP osteoblasts (GFP+) as well as other cells (GFP-). Plotted are the  $\Delta$ CT values relative to the average of two house-keeping genes. Error bars represent SD. Unpaired *t*-tests.

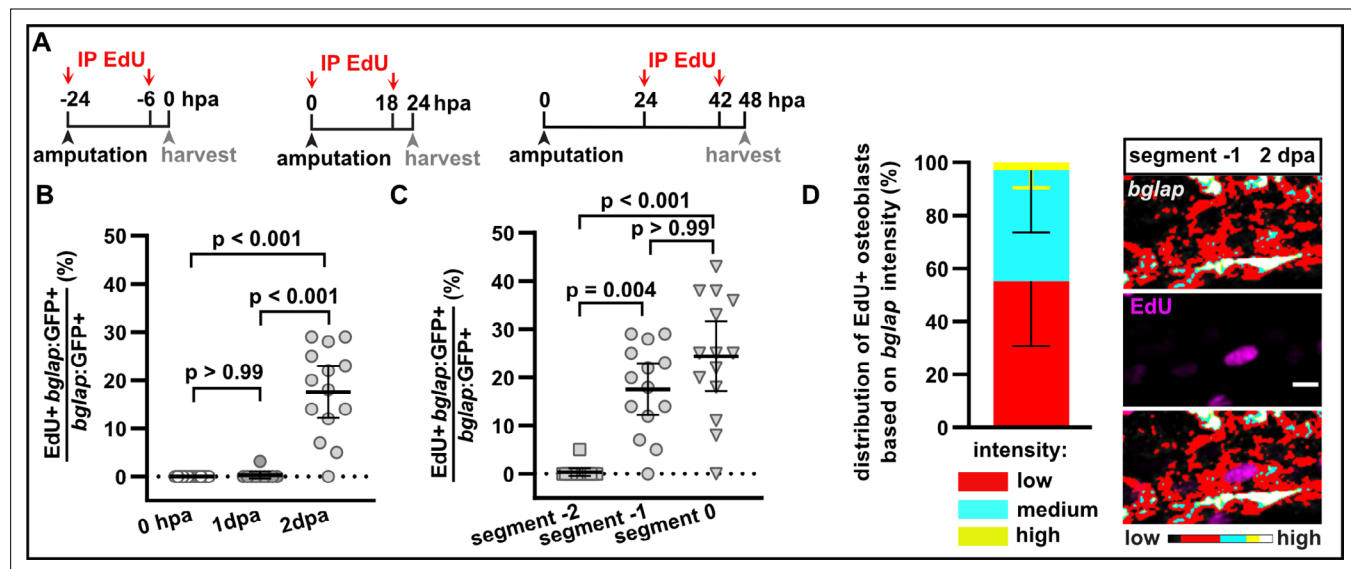

**Figure 5—figure supplement 2.** Proliferation of *bglap:GFP+* osteoblasts. **(A)** Experimental scheme indicating EdU intraperitoneal (IP) injections used to label cycling osteoblasts harvested at different time points for the data presented in panels B–D. **(B)** Proliferation timeline of *bglap:GFP+* osteoblasts in segment -1 as determined by EdU incorporation. N (experiments)=1, n (fins)=4 (0 hpa), 10 (1 day post amputation [dpa]), 9 (2 dpa); n (rays)=14 (0, 2 dpa), 10 (1 dpa). Error bars represent 95% CI. Kruskal-Wallis test. **(C)** Proliferation of *bglap:GFP+* osteoblasts in segment -2, segment -1, and segment 0 at 2 dpa. N (experiments)=1, n (fins)=9, n (rays)=14. Error bars represent 95% CI. Dunn's test. **(D)** *bglap* RNA scope expression levels of EdU+ cells in segment -1 at 2 dpa. *bglap*-expressing osteoblasts were categorised based on RNA scope signal intensity into 'high' (yellow), 'medium' (cyan), and 'low' (red) using a look-up table, with 'high' threshold corresponding to expression levels in segment -2. N (experiments)=1, n (fins)=9, n (rays)=12, n (cells)=62. Error bars represent SD. Scale bar, 10  $\mu\text{m}$ .

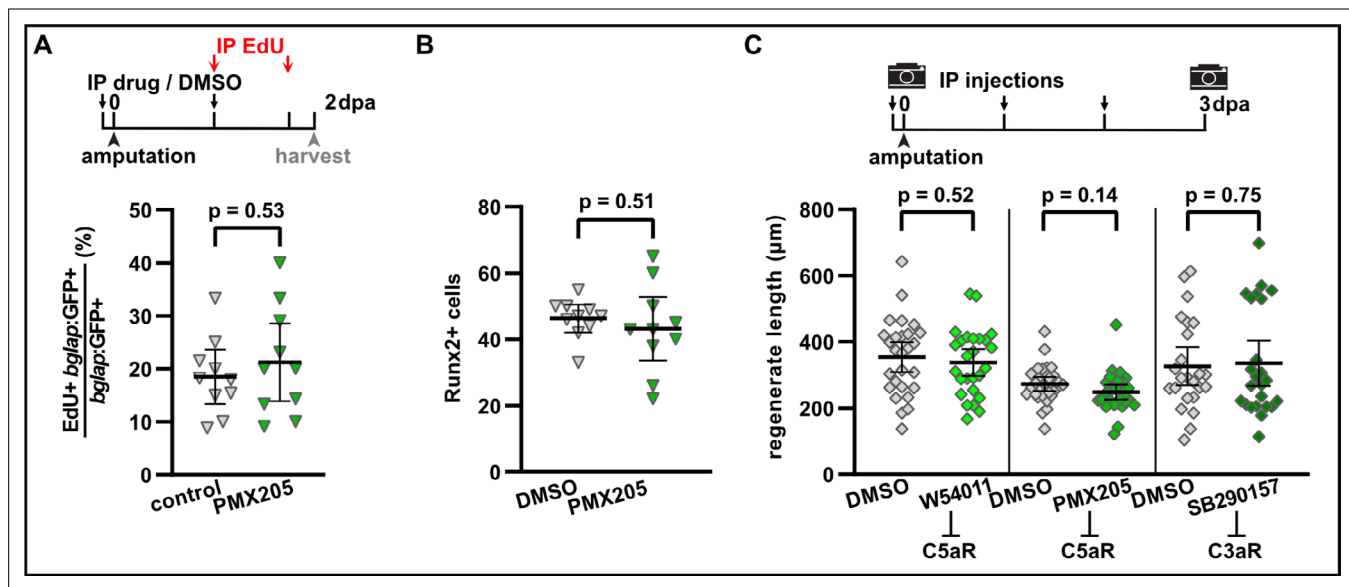

**Figure 5—figure supplement 3.** Complement system signalling is not required for osteoblast proliferation, dedifferentiation, and regenerative growth. **(A)** The fraction of proliferating osteoblasts (EdU+ *bglap:GFP+*) in segment –1 at 2 day post amputation (dpa) is not altered by intraperitoneal (IP) injection of PMX205. N (experiments)=1, n (fish)=10. Error bars represent 95% CI. Unpaired t-tests. The observed relative difference is 7%, the calculated smallest significant difference is 28%. **(B)** PMX205 does not affect the number of cells upregulating Runx2 as detected by immunofluorescence in segment 0 at 2 dpa. N (experiments)=1, n (fins)=10, n (rays)=10. Error bars represent 95% CI. Unpaired t-test. **(C)** Absolute regenerate length at 3 dpa is not affected by W54011, PMX205, or SB290157 treatment. N (experiments)=3, n (fins)=27 (W54011), 29 (PMX205), 24 (SB290157); appertaining controls have the same n. Error bars represent 95% CI. Unpaired t-tests. The observed relative difference is 8% (W54011), 13% (PMX205), and 6% (SB290157), the calculated smallest significant differences are 30% (W54011), 21% (PMX205), and 36% (SB290157), which are smaller than what we have observed previously in a large chemical screen (Mishra et al., 2020), suggesting that in principle our experiment had enough power to detect a similar effect size.

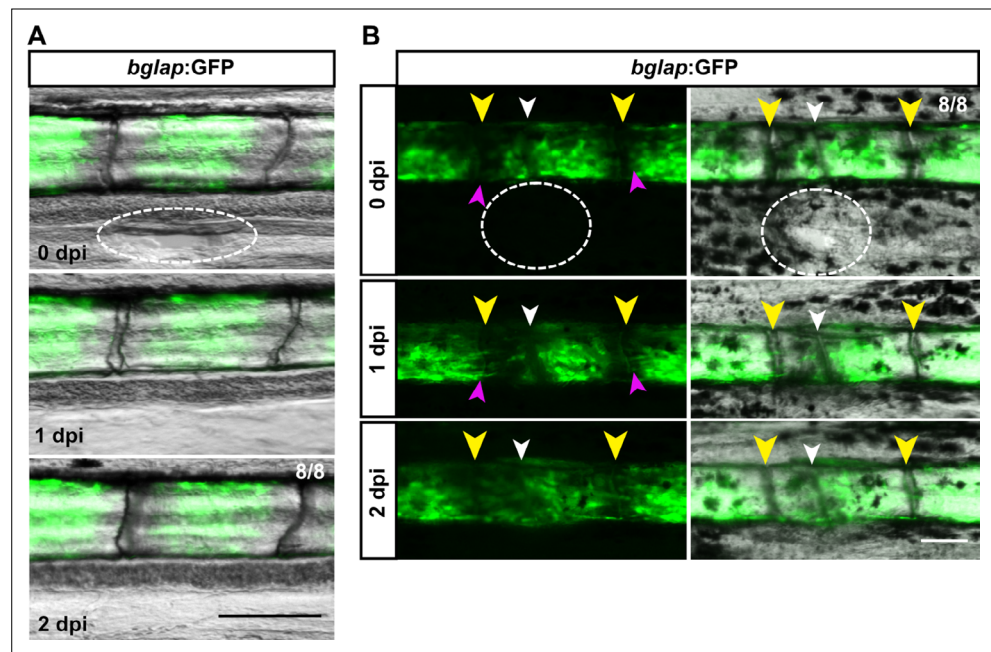

**Figure 5—figure supplement 4.** Injuries that do not trigger structural regeneration do not attract osteoblasts. (A) Incision in the interray skin (dashed oval) close to the bony ray does not induce migration of *bglap:GFP*+ osteoblasts from the bony ray into the interray mesenchyme.  $n=8/8$  fins show no migration. Scale bar, 100 μm. (B) Incision in the interray (dashed oval) in combination with bone fracture (white arrowhead) induces migration of *bglap:GFP*+ osteoblasts towards the fracture (pink arrowheads), but not into the interray. Yellow arrowheads indicate joints.  $n=8/8$  fins. Scale bar, 100 μm.

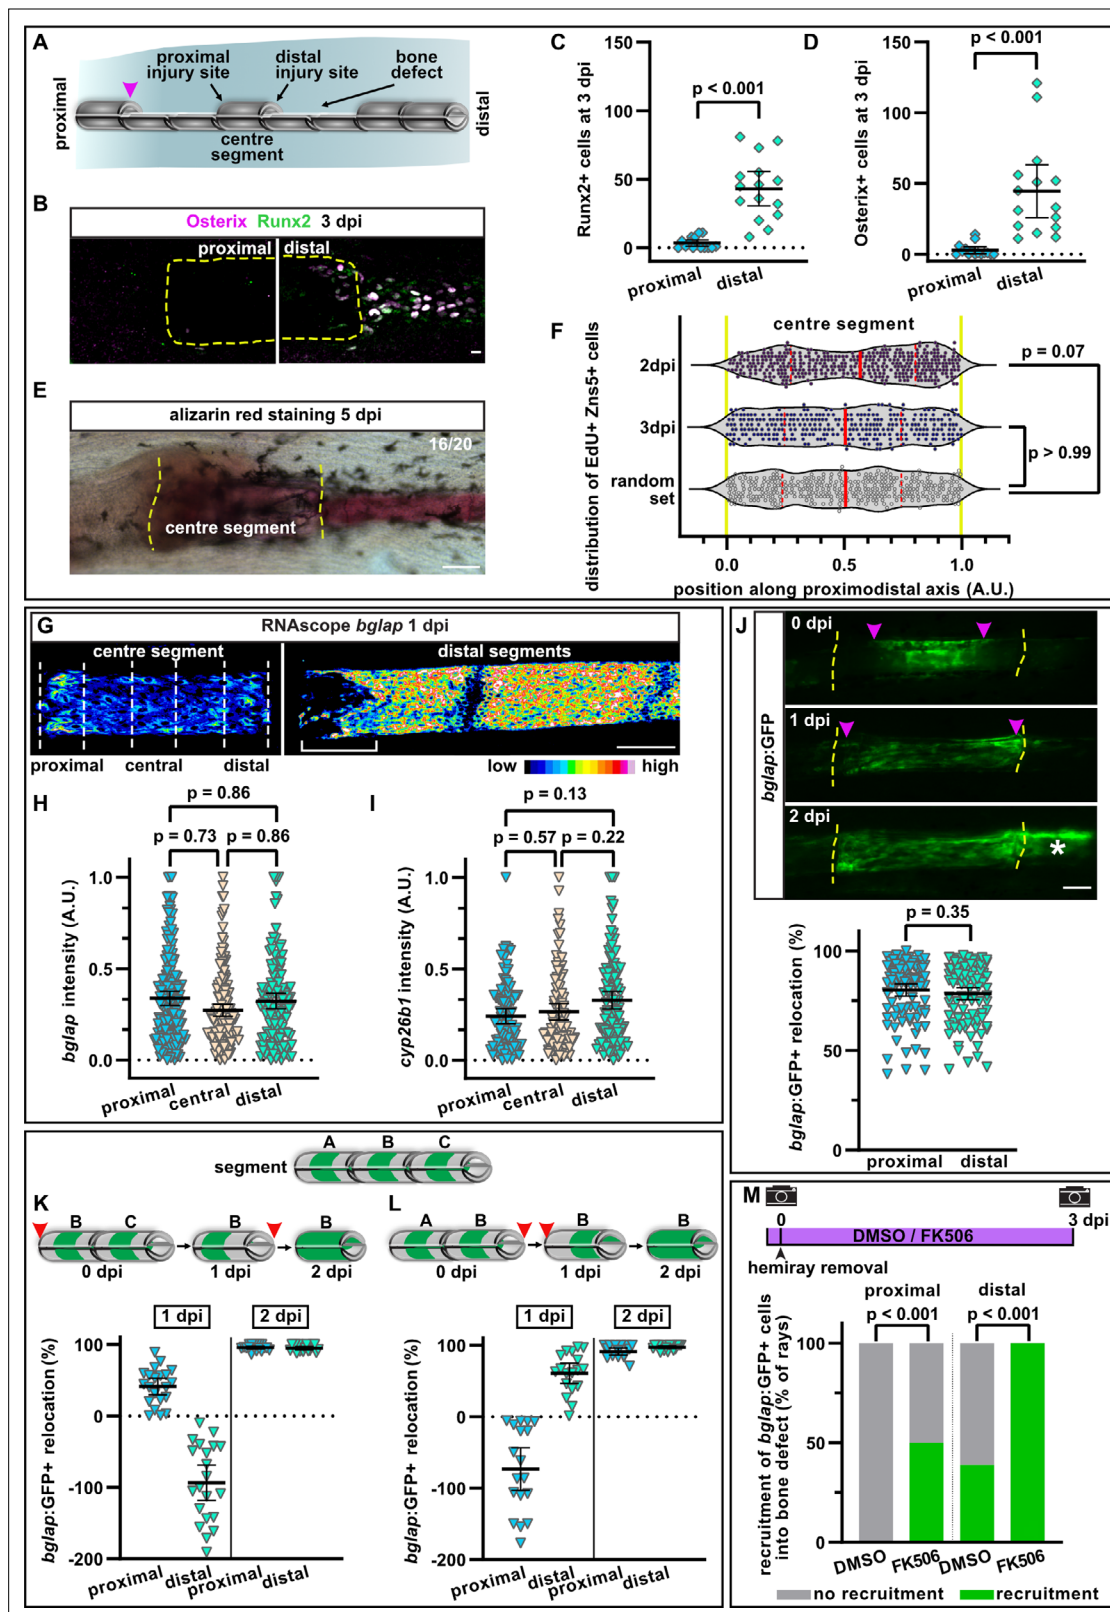

**Figure 6.** A hemiray removal injury model distinguishes generic vs regeneration-specific osteoblast injury responses. **(A)** Hemiray removal scheme creating a proximal and distal facing injury on both sides of a central intact segment. **(B)** At 3 days post injury (dpi), Runx2+ preosteoblasts and committed osteoblasts expressing Osterix have only accumulated in the bone defect beyond the distal injury site of the centre segment, but not beyond the proximal injury site, as determined by immunofluorescence. Dashed line outlines centre segment. Scale bar, 10  $\mu$ m. **(C, D)** Quantification

Figure 6 continued on next page



## Figure 6 continued

of the number of Runx2+ cells (**C**) or Osterix+ cells (**D**) located in the bone defect beyond the proximal and distal injury sites of the centre segment at 3 dpi. N (experiments)=2, n (rays)=15. Error bars represent 95% CI. Wilcoxon matched-pairs test. (**E**) At 5 dpi, mineralised bone as detected by alizarin red staining has formed beyond the distal, but not the proximal injury site of the centre segment. Dashed line indicates centre segment. n=16/20 rays with distal bone formation. Scale bar, 100  $\mu$ m. (**F**) Distribution of all positions along the proximodistal axis of centre segments, where proliferating EdU+ Zns5+ osteoblasts were observed at 2 and 3 dpi. Yellow dashed lines indicate segment border. Solid red lines, median; dashed lines, quartiles. N (experiments)=1, 2 dpi: n (rays)=13, n (cells)=306; 3 dpi: n (rays)=17, n (cells)=305; random set: n (groups)=12, n (points)=360. Kolmogorov-Smirnov test. (**G**) RNAscope in situ detection of *bglap* expression in the centre segment and the two adjacent segments distal to the bone defect at 1 dpi. Dashed lines indicate the proximal, central, and distal regions of the centre segment used for quantification. Bracket indicates dedifferentiation zone in the distal segments. Scale bar, 100  $\mu$ m. (**H**, **I**) Single cell analysis of RNAscope intensity of *bglap* (**H**) or *cyp26b1* (**I**) relative to the brightest signal in proximal, central, and distal regions of the centre segment at 1 dpi. N (experiments)=2, n (segments)=8 (*bglap*), 7 (*cyp26b1*). Error bars represent 95% CI. Holm-Sidak's multiple comparison test. (**J**) Migration of *bglap*:GFP+ osteoblasts towards both injury sites of the centre segment. Yellow dashed lines, segment borders. Pink arrowheads indicate relocation of GFP+ osteoblasts. Asterisk indicates GFP+ osteoblasts that have entered the distal bone defect. Distal to the right. N (experiments)=4, n (segments)=95. Error bars represent 95% CI. Wilcoxon matched-pairs test. Scale bar, 100  $\mu$ m. (**K**, **L**) Sequential hemiray injuries reveal no preference for osteoblast migration in distal vs proximal directions. Relocation of *bglap*:GFP+ osteoblasts in the centre segment (segment B) is plotted. Error bars represent 95% CI. Red arrowheads indicate time points at which the adjacent hemirays (A=proximal, C=distal) were removed. Negative relocation indicates increased distance between GFP+ cells and the joint. (**K**) Removal of the proximal adjacent segment A at 0 dpi, followed by removal of the distal adjacent segment C at 1 dpi. (**L**) Removal of the distal adjacent segment C at 0 dpi, followed by removal of the proximal adjacent segment A at 1 dpi. (**M**) Migration of osteoblasts into the bone defect at 3 dpi. Treatment with FK506 induces recruitment of GFP+ cells beyond the proximal injury site and increases the number of centre segments that show recruitment of GFP+ cells beyond the distal injury site. N (experiments)=1, n (segments)=56 (DMSO), 17 (FK506). Fisher's test.



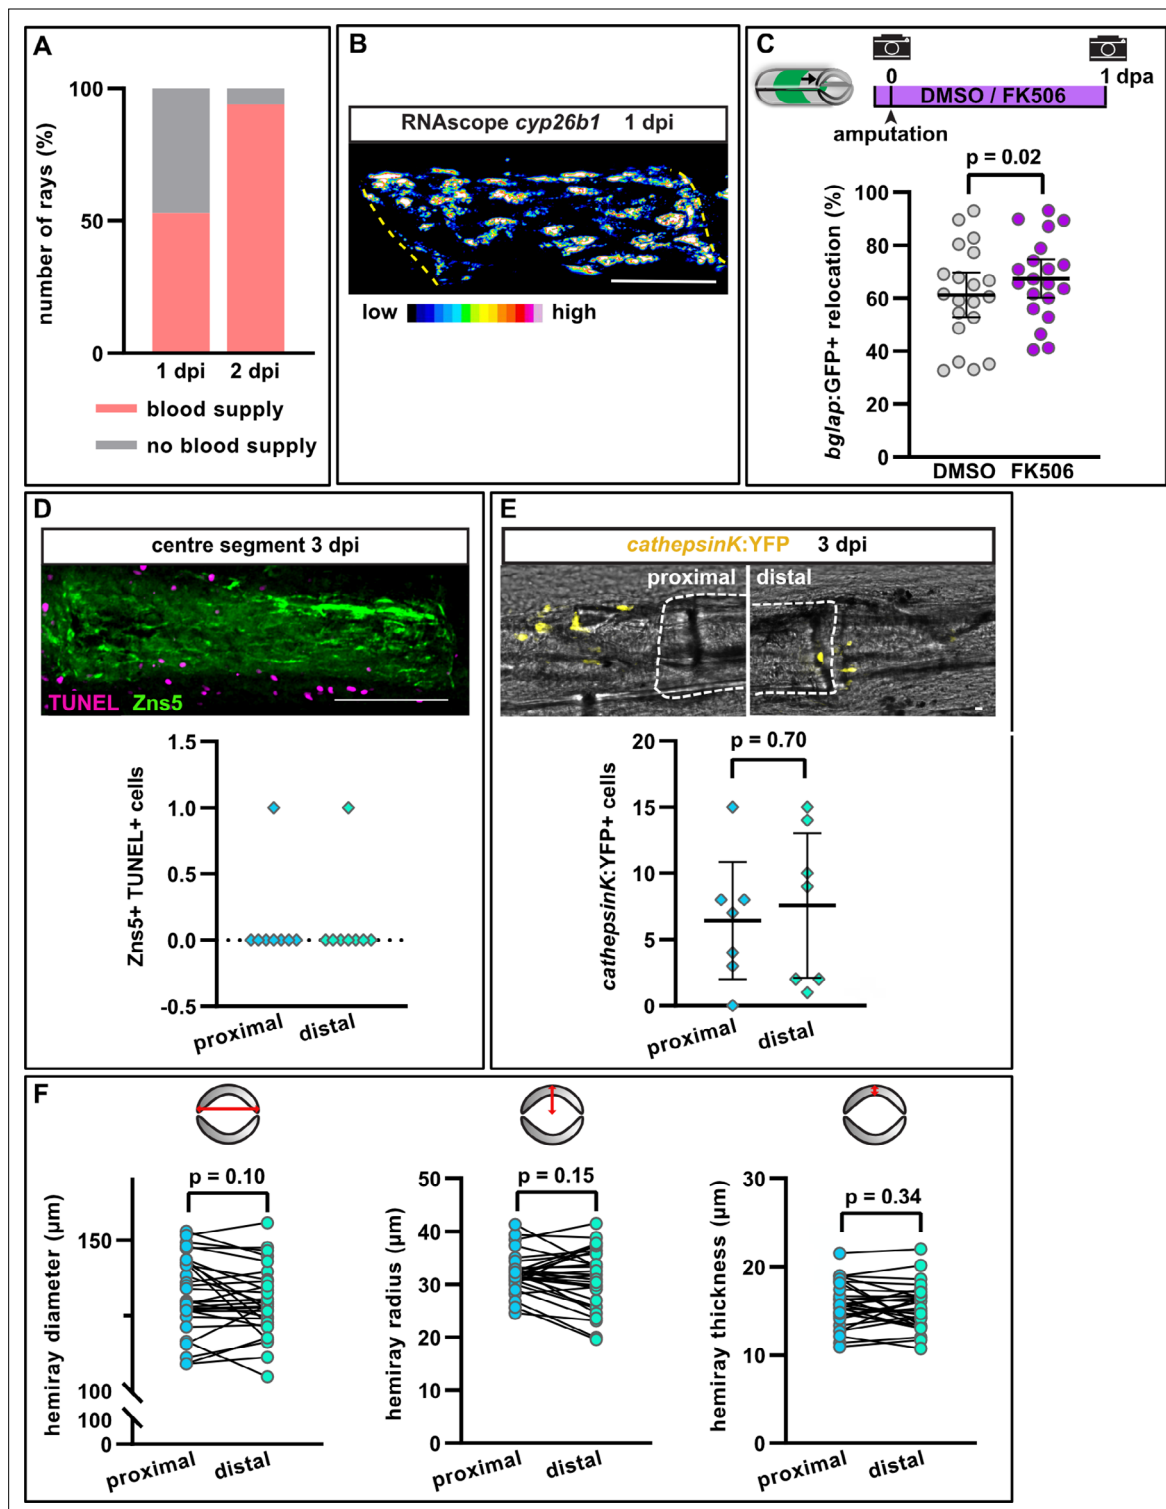

**Figure 6—figure supplement 1.** Properties of the hemiray injury model. **(A)** Revascularisation of the centre segment at 1 and 2 days post injury (dpi). Most segments are fully recovered by 2 dpi. N (experiments)=2, n (segments)=36. **(B)** RNAscope in situ detection of *cyp26b1* expression in a centre segment at 1 dpi. Scale bar, 100  $\mu\text{m}$ . Representative image for quantitative data presented in **Figure 6I**. **(C)** Calcineurin inhibition with FK506 slightly increases osteoblast recruitment towards the amputation plane in segment -1. 100% indicates full crossing of the distance to the respective joint at 1 day post amputation (dpa). N (experiments)=1, n (fins)=10, n (rays)=20. Error bars represent 95% CI. Unpaired t-test. **(D)** TUNEL staining for apoptotic cells with Zns5 labelling of osteoblasts in the centre segment at 3 dpi. n (segments)=8. Scale bar, 100  $\mu\text{m}$ . **(E)** Number of osteoclasts labelled using the *cathepsinK:YFP* transgenic line at the centre segment at 3 dpi. No difference is detected between the proximal and distal injury site. N (experiments)=2, Figure 6—figure supplement 1 continued on next page

*Figure 6—figure supplement 1 continued*

n (segments)=7. Error bars represent 95% CI. Unpaired t-test. Scale bar, 100  $\mu$ m. **(F)** Hemiray morphology at the proximal and distal end of the third segment proximal to the bifurcation of the second dorsal ray (which is the segment used as centre segment in the hemiray removal assays). The diameter and radius of hemirays are analysed, as well as the thickness. No difference between the proximal and distal end can be detected. N (experiments)=1, n (segments)=30. Paired t-tests.

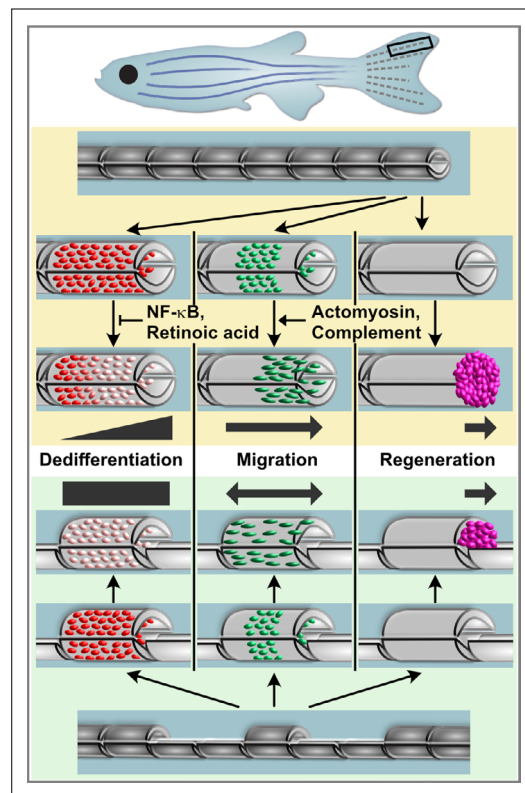

**Figure 7.** Model for osteoblast responses to fin amputation (upper panel) and hemiray removal (lower panel). Osteoblast dedifferentiation and migration represent generic injury responses that are differentially regulated and can occur independently of each other and of regenerative bone growth. Upper panel: After fin amputation, osteoblasts downregulate the expression of differentiation markers. The extent depends on their distance to the amputation site, with osteoblasts close to the amputation site displaying more pronounced dedifferentiation. In addition, osteoblasts elongate and migrate towards the amputation plane and beyond to found osteogenic cells in the blastema (pink). Thus, osteoblast dedifferentiation, migration, and bone regeneration are all distally oriented. Osteoblast dedifferentiation is negatively regulated by NF- $\kappa$ B and retinoic acid signalling, while actomyosin dynamics and the complement system are required for directed osteoblast migration. Lower panel: In the hemiray removal model, a proximal and a distal injury are created on both sides of a remaining centre segment. The extent of osteoblast dedifferentiation is even along the centre segment, and osteoblasts migrate towards both injury sites. Yet, only at the distally-facing site, osteoblasts migrate into the bone defect, and blastema formation and bone regeneration only occur here.
